# Supplementary material
Source: PubMed Central journal article supplement (PMC7304899)
Supplement: jo0c00441_si_001.pdf [file jo0c00441_si_001.pdf]

Supporting Information for:

Modeling the Alkaline Hydrolysis of Diaryl Sulfate  
Diesters: A Mechanistic Study

Klaudia Szeler,<sup>1</sup> Nicholas H. Williams,<sup>2</sup> Alvan C. Hengge,<sup>3,\*</sup> Shina C. L. Kamerlin<sup>1,\*</sup>

1. Department of Chemistry – BMC, Uppsala University, BMC Box 576, S-751 23 Uppsala, Sweden. 2. Department of Chemistry, University of Sheffield, Sheffield, S3 7HF, UK. 3. Department of Chemistry and Biochemistry, Utah State University, Logan, UT 84322-0300, USA.

## Table of Contents

|                                                            |    |
|------------------------------------------------------------|----|
| Supplementary Figures .....                                | 3  |
| Supplementary Tables .....                                 | 12 |
| Cartesian Coordinates of Optimized Stationary Points ..... | 98 |
| Supplementary References.....                              | 99 |

## Supplementary Figures

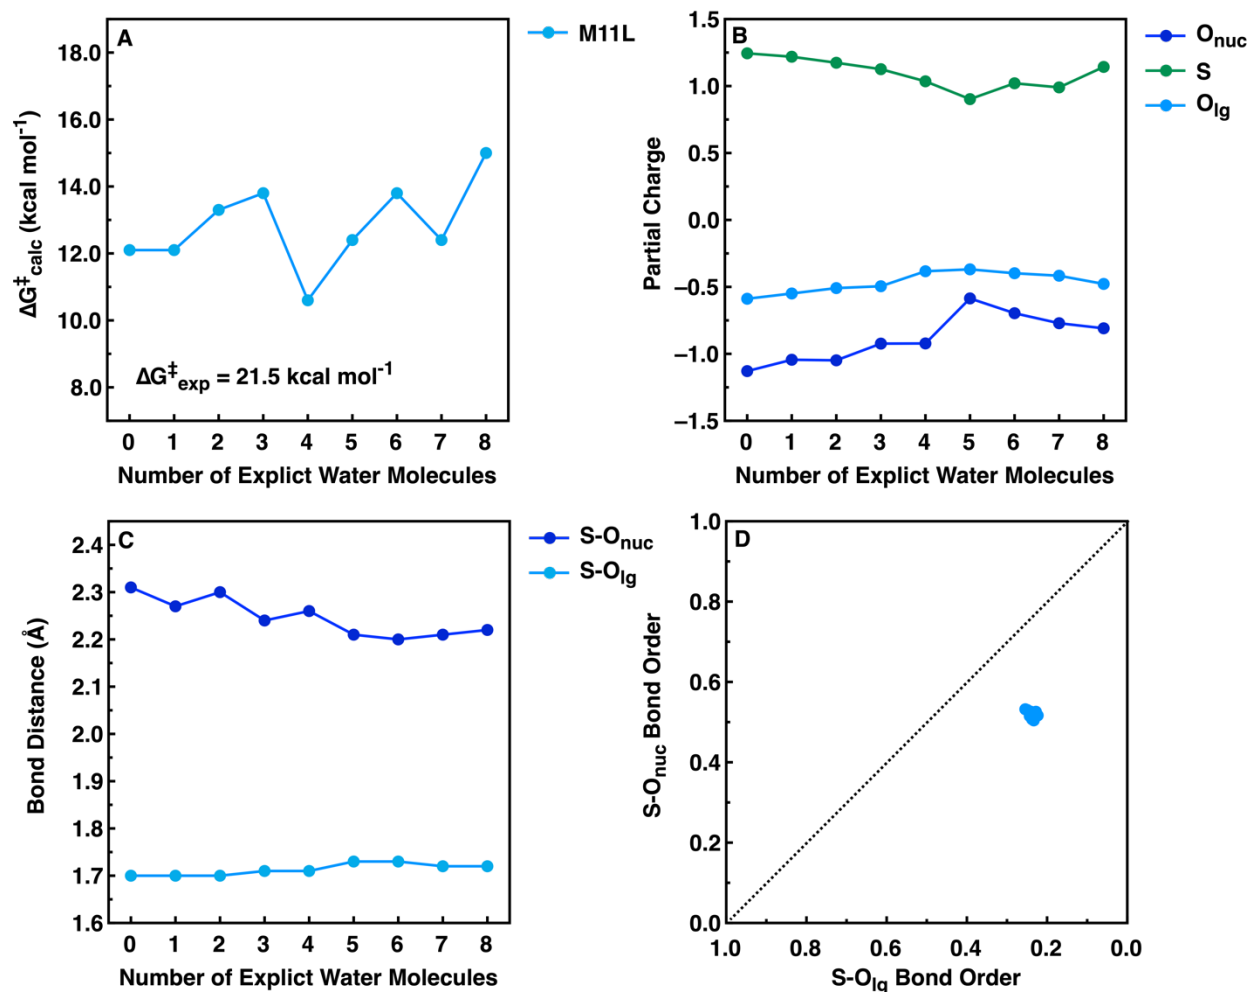

**Figure S1.** Overview of the (A) activation free energies, (B) partial charges at the transition state, (C) S-O<sub>nuc</sub> and S-O<sub>Ig</sub> distances at the transition state and (D) S-O<sub>nuc</sub> and S-O<sub>Ig</sub> bond orders at the transition state for the alkaline hydrolysis of 4-nitrophenyl sulfate with varying numbers of water molecules, obtained using the M11L<sup>1</sup> functional, as described in the **Methodology** section. The calculated activation free energy was obtained using transition state theory at 313.15 K, based on kinetic data provided in ref. <sup>2</sup>. For the corresponding data obtained using the  $\omega$ B97X-D<sup>3</sup> and M062X<sup>4</sup> functionals, see **Figures 3** and **S2**, and for the corresponding raw data see **Tables S1** to **S21**.

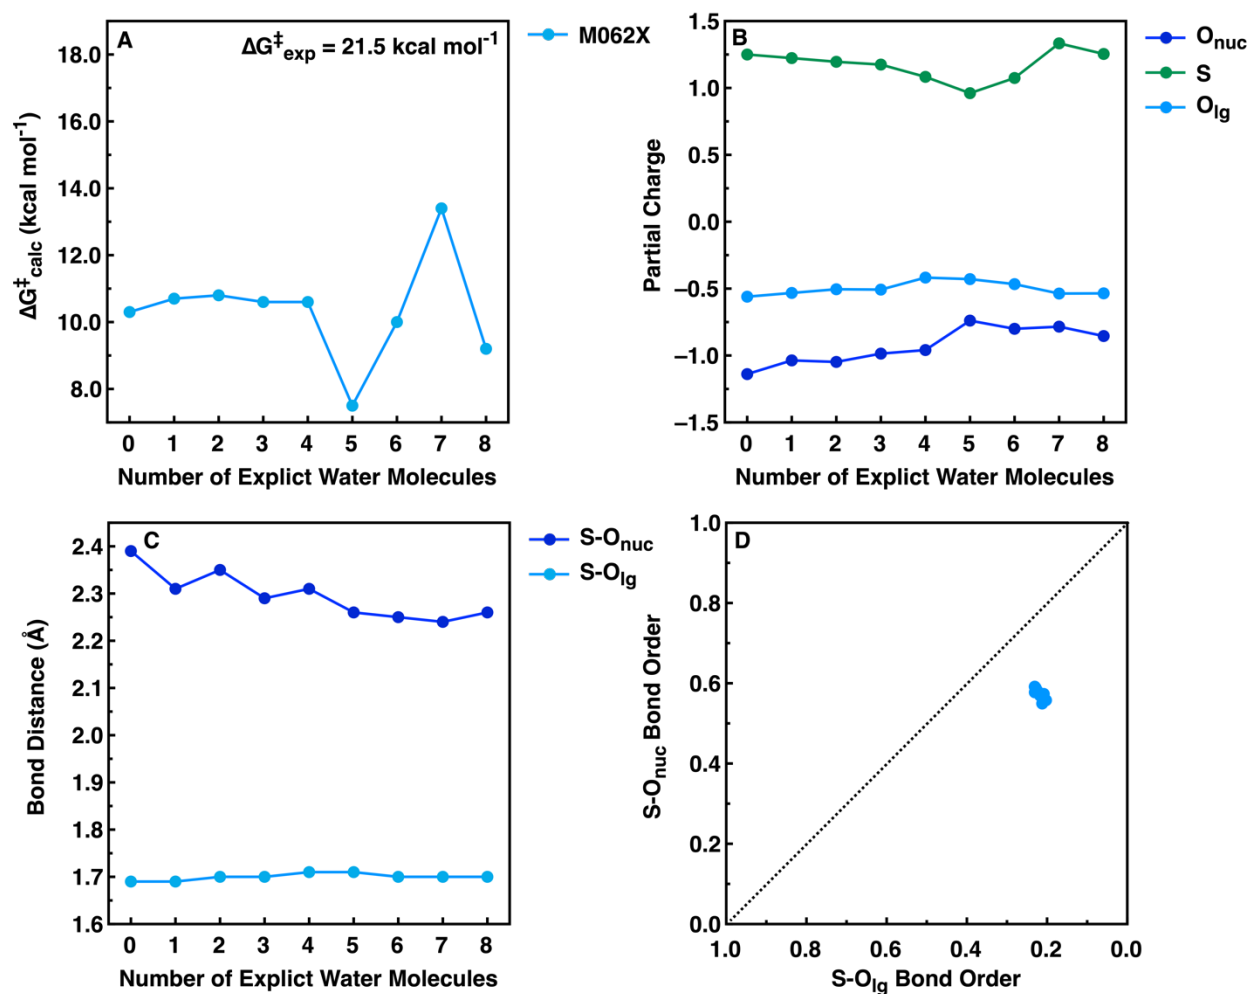

**Figure S2.** Overview of the (A) activation free energies, (B) partial charges at the transition state, (C)  $S-O_{\text{nuc}}$  and  $S-O_{\text{Ig}}$  distances at the transition state and (D)  $S-O_{\text{nuc}}$  and  $S-O_{\text{Ig}}$  bond orders at the transition state for the alkaline hydrolysis of 4-nitrophenyl sulfate with varying numbers of water molecules, obtained using the M062X<sup>4</sup> functional, as described in the **Methodology** section. The calculated activation free energy was obtained using transition state theory at 313.15 K, based on kinetic data provided in ref. <sup>2</sup>. For the corresponding data obtained using the  $\omega$ B97X-D<sup>3</sup> and M11L<sup>1</sup> functionals, see **Figures 3** and **S1**, and for the corresponding raw data see **Tables S1** to **S21**.

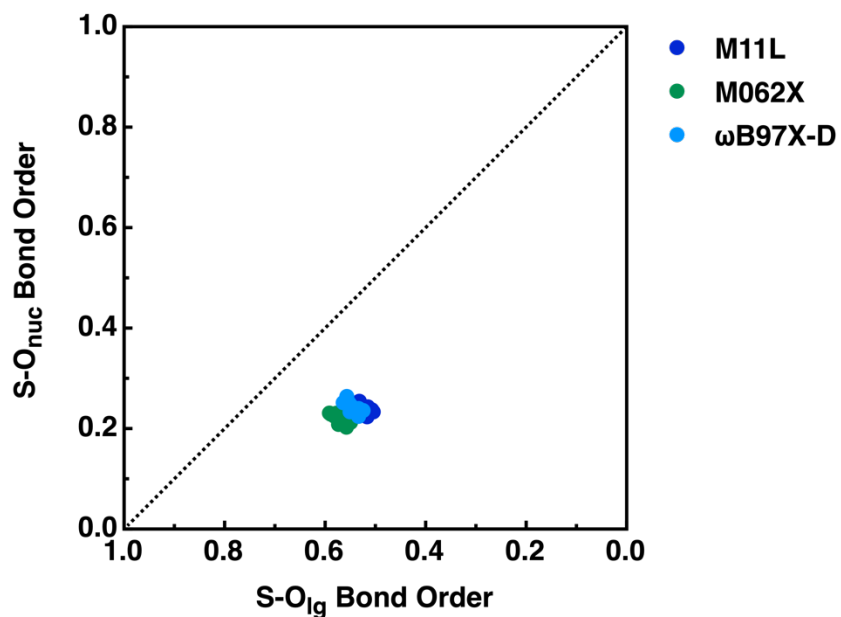

**Figure S3.** Overlay of the S-O<sub>nuc</sub> and S-O<sub>lg</sub> bond orders at the transition state for the alkaline hydrolysis of 4-nitrophenyl sulfate with varying numbers of water molecules, obtained using the ωB97X-D,<sup>3</sup> M062X<sup>4</sup> and M11L<sup>1</sup> functionals, as described in the **Methodology** section. For the corresponding raw data see **Tables S1** to **S21**.

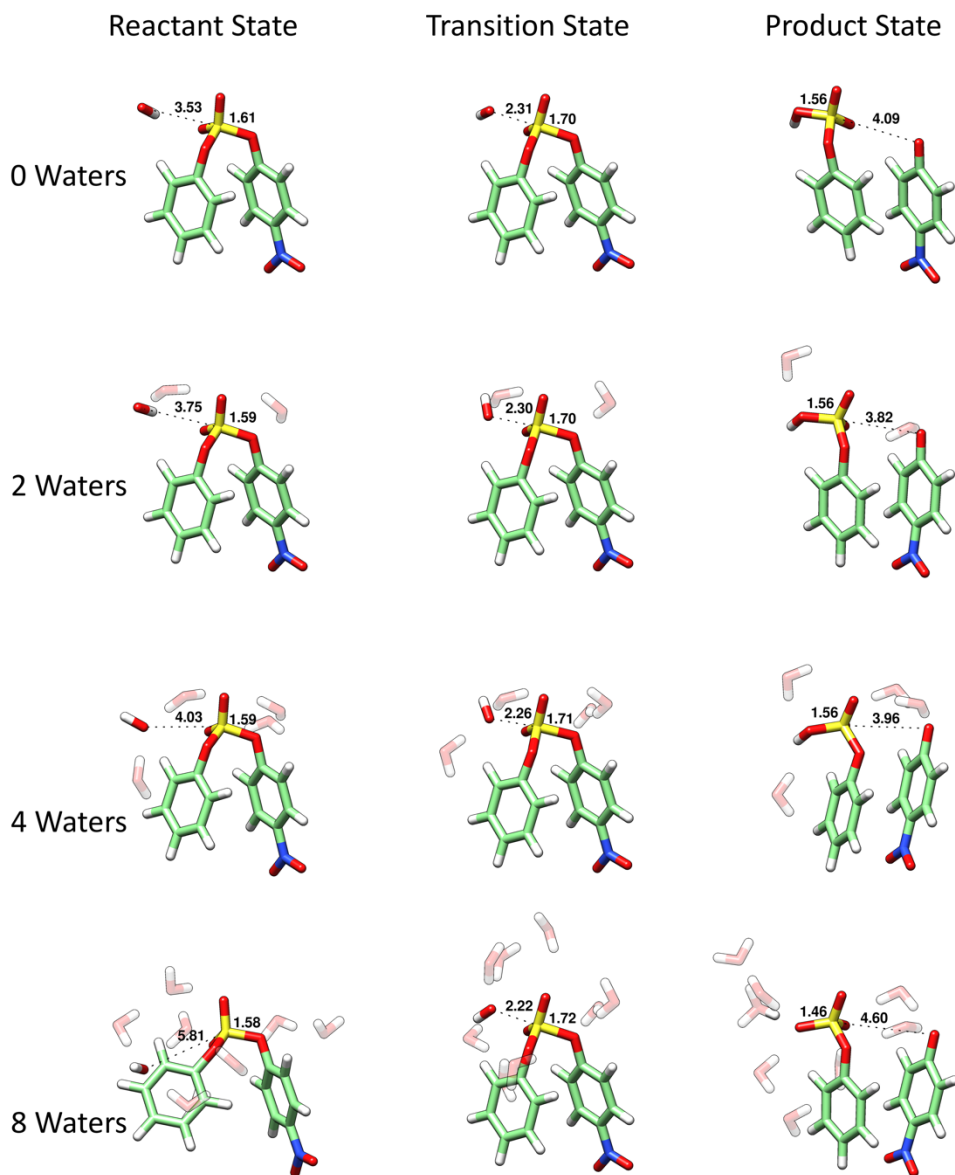

**Figure S4.** Representative structures of the ground, transition and product states for the alkaline hydrolysis of 4-nitrophenyl sulfate obtained using the M11L functional,<sup>1</sup> in the presence of varying numbers of explicit solvent molecules, as described in the **Methodology** section. The calculated S-O<sub>nuc</sub> and S-O<sub>lg</sub> distances are annotated for each optimized reacting state (in Å), and the corresponding data obtained using the  $\omega$ B97X-D<sup>3</sup> and M062X<sup>4</sup> functionals is shown in **Figures 4** and **S5**, respectively. Finally, coordinates of all optimized stationary points are provided as **Supporting Information**.

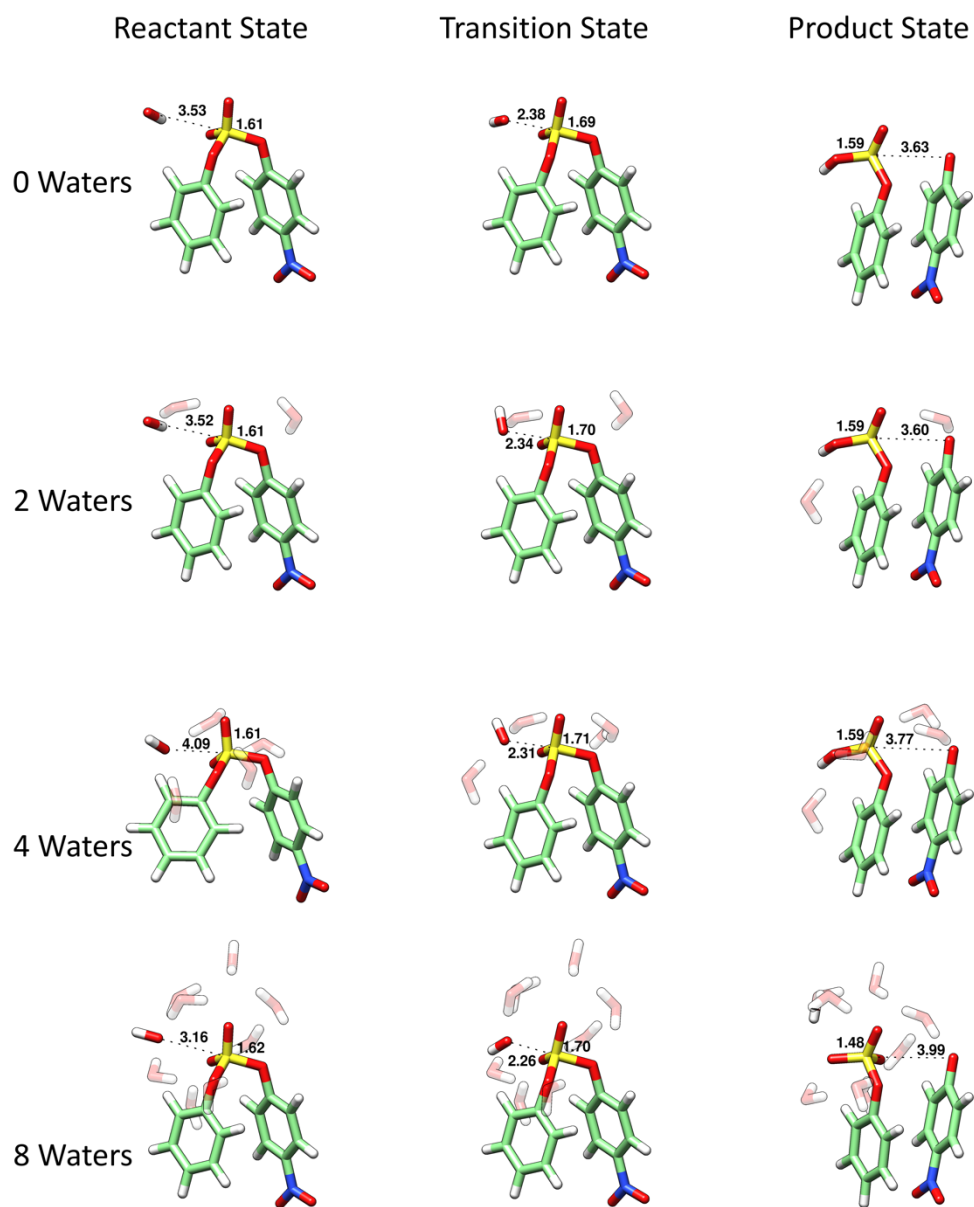

**Figure S5.** Representative structures of the ground, transition and product states for the alkaline hydrolysis of 4-nitrophenyl sulfate obtained using the M062X functional,<sup>4</sup> in the presence of varying numbers of explicit solvent molecules, as described in the **Methodology** section. The calculated S-O<sub>nuc</sub> and S-O<sub>lg</sub> distances are annotated for each optimized reacting state (in Å), and the corresponding data obtained using the  $\omega$ B97X-D<sup>3</sup> and M11L<sup>1</sup> functionals is shown in **Figures 4** and **S4**, respectively. Finally, coordinates of all optimized stationary points are provided as **Supporting Information**.

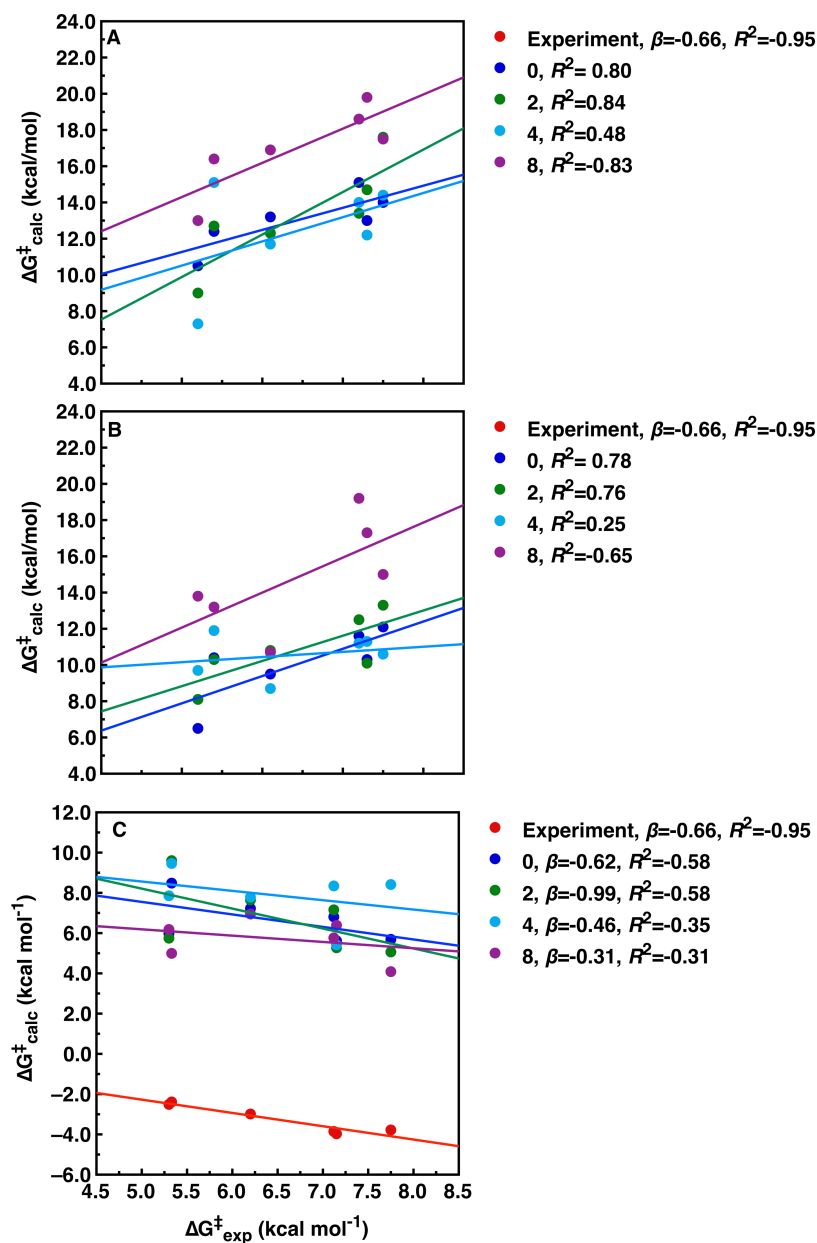

**Figure S6.** A comparison of experimental ( $\Delta G^{\ddagger}_{\text{exp}}$ ) and calculated ( $\Delta G^{\ddagger}_{\text{calc}}$ ) activation free energies for the alkaline hydrolysis of the aryl sulfate diesters studied in this work (**Figure 2**), in the presence of 0 (implicit solvent), 2, 4 or 8 explicit water molecules. Data was obtained using either the (A)  $\omega$ B97X-D,<sup>3</sup> (B) M11L<sup>1</sup> or (C) M062X<sup>4</sup> functionals. The corresponding raw data is presented in **Tables S34 to S57**. Experimental activation free energies were obtained at 313.15 K using transition state theory based on kinetic data provided in ref. <sup>2</sup>.



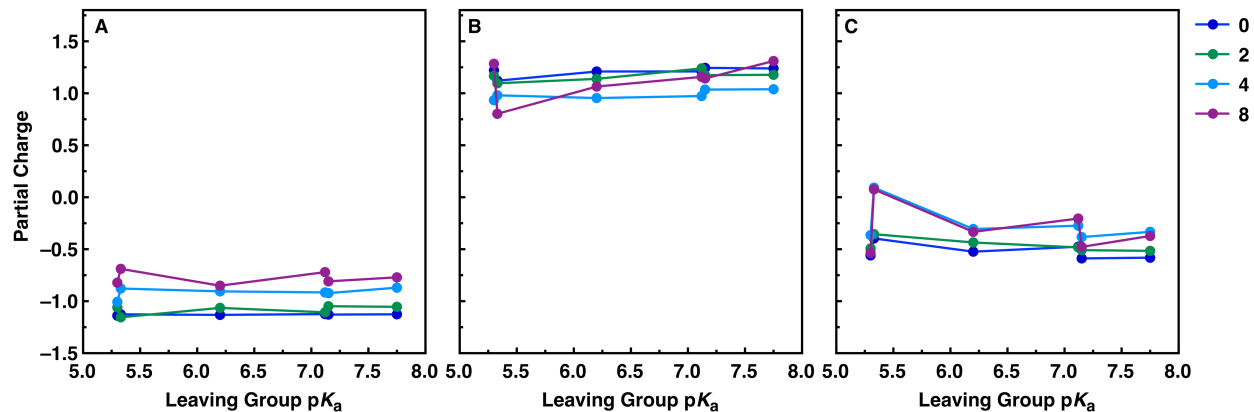

**Figure S7.** Partial charges on (A) the nucleophile oxygen, (B) the sulfur atom and (C) the leaving group oxygen, at the transition states for the alkaline hydrolysis of the aryl sulfate diesters studied in this work (Figure 2), in the presence of 0 (implicit solvent), 2, 4 or 8 explicit water molecules. Partial charges were calculated using the M11L<sup>1</sup> functional and the CHELPG charge calculation scheme<sup>5</sup> as described in the Methodology section. The corresponding charge distributions obtained using the wB97xD<sup>3</sup> and M062X<sup>4</sup> functionals are shown in Figures 6 and S8, respectively, and the corresponding raw data is shown in Table S58 to S81.

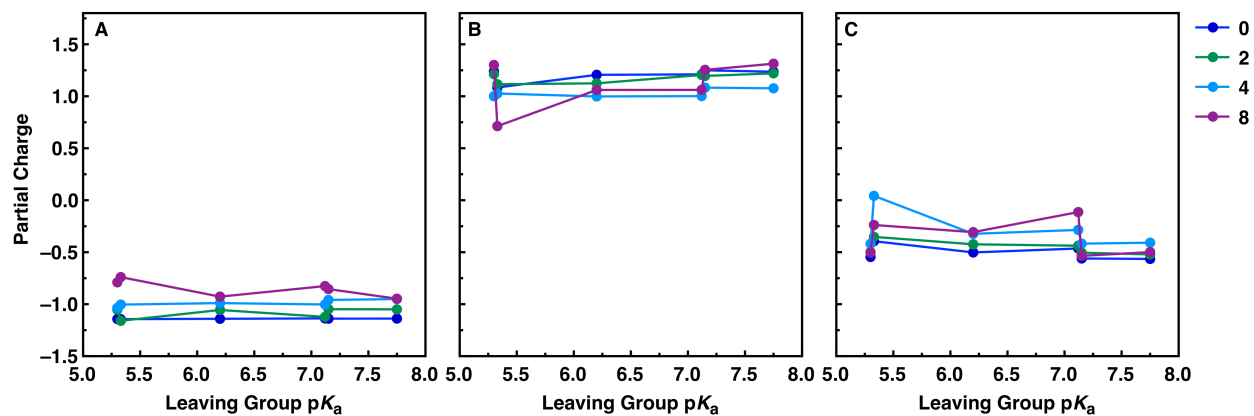

**Figure S8.** Partial charges on (A) the nucleophile oxygen, (B) the sulfur atom and (C) the leaving group oxygen, at the transition states for the alkaline hydrolysis of the aryl sulfate diesters studied in this work (Figure 2), in the presence of 0 (implicit solvent), 2, 4 or 8 explicit water molecules. Partial charges were calculated using the M062X<sup>4</sup> functional and the CHELPG charge calculation scheme<sup>5</sup> as described in the **Methodology** section. The corresponding charge distributions obtained using the wb97xD<sup>3</sup> and M11L<sup>1</sup> functionals are shown in **Figures 6** and **S7**, respectively, and the corresponding raw data is shown in **Table S58 to S81**.

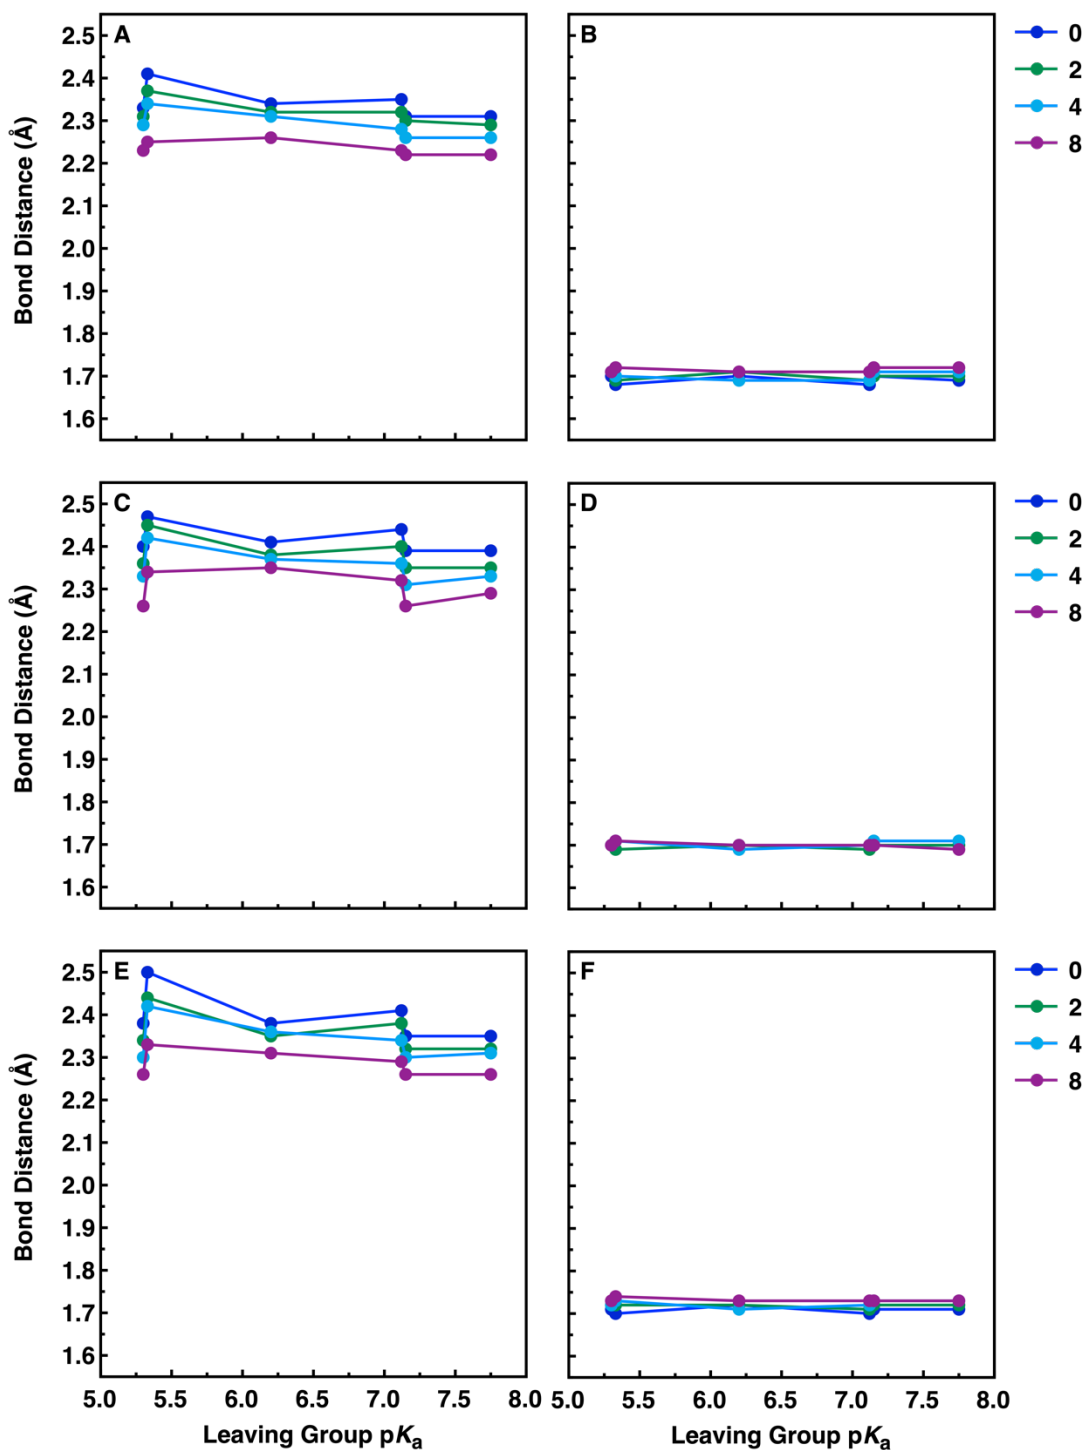

**Figure S9.** Calculated (A,C,E) S-O<sub>nuc</sub> and (B,D,F) S-O<sub>lg</sub> distances at the transition states for the alkaline hydrolysis of the aryl sulfate diesters studied in this work (**Figure 2**), in the presence of 0 (implicit solvent), 2, 4 or 8 explicit water molecules. Data was obtained using either the (A,B) M11L,<sup>1</sup> (C,D) M062X<sup>4</sup> or (E,F)  $\omega$ B97X-D<sup>3</sup> functionals. The corresponding raw data is presented in **Table S82 to S105**.

## Supplementary Tables

**Table S1.** Energy decomposition of the calculated activation free energies ( $\Delta G_{\text{calc}}^{\ddagger}$ ) for the alkaline hydrolysis of 4-nitrophenyl sulfate in the presence of 0 to 8 additional explicit water molecules, obtained using the  $\omega$ B97X-D<sup>3</sup> functional.<sup>a</sup>

| Water Molecules | $\Delta E^{\ddagger}$ | $\Delta ZPE^{\ddagger}$ | $-T\Delta S^{\ddagger}$ | $\Delta G_{\text{calc}}^{\ddagger}$ | $\Delta G_{\text{exp}}^{\ddagger}$ | $\nu$     |
|-----------------|-----------------------|-------------------------|-------------------------|-------------------------------------|------------------------------------|-----------|
| 0               | 10.6                  | 0.2                     | 3.2                     | <b>14</b>                           | <b>21.5</b>                        | -269.6541 |
| 1               | 11.8                  | 0.4                     | 3.2                     | <b>15.4</b>                         | <b>21.5</b>                        | -273.9228 |
| 2               | 17.4                  | -0.4                    | 0.6                     | <b>17.6</b>                         | <b>21.5</b>                        | -289.4289 |
| 3               | 14.5                  | -0.1                    | 1.7                     | <b>16.1</b>                         | <b>21.5</b>                        | -275.8035 |
| 4               | 13.8                  | -0.3                    | 0.9                     | <b>14.4</b>                         | <b>21.5</b>                        | -266.4356 |
| 5               | 20.2                  | -1                      | -3.2                    | <b>16</b>                           | <b>21.5</b>                        | -282.5629 |
| 6               | 20.7                  | -0.9                    | -1.4                    | <b>18.4</b>                         | <b>21.5</b>                        | -281.2544 |
| 7               | 16.2                  | 0.6                     | -1.4                    | <b>14.2</b>                         | <b>21.5</b>                        | -282.4447 |
| 8               | 17.3                  | -0.3                    | 0.5                     | <b>17.5</b>                         | <b>21.5</b>                        | -281.4245 |

<sup>a</sup> All energies are shown in kcal mol<sup>-1</sup>, and vibrational frequencies are shown in cm<sup>-1</sup>.  $\Delta E^{\ddagger}$ ,  $\Delta ZPE^{\ddagger}$  and  $-T\Delta S^{\ddagger}$  denote the contributions to  $\Delta G_{\text{calc}}^{\ddagger}$  from the electronic energy, zero-point energy and activation free energy, respectively.  $\nu$  denotes the first vibrational frequency.  $\Delta G_{\text{exp}}^{\ddagger}$  denotes the experimental activation free energy at 313.15 K, obtained from the kinetic data presented in ref. <sup>2</sup> using transition state theory.

**Table S2.** Energy decomposition of the calculated activation free energies ( $\Delta G^\ddagger_{\text{calc}}$ ) for the alkaline hydrolysis of 4-nitrophenyl sulfate in the presence of 0 to 8 additional explicit water molecules, obtained using the M11L<sup>1</sup> functional.<sup>a</sup>

| Water Molecules | $\Delta E^\ddagger$ | $\Delta ZPE^\ddagger$ | $-T\Delta S^\ddagger$ | $\Delta G^\ddagger_{\text{calc}}$ | $\Delta G^\ddagger_{\text{exp}}$ | $\nu$     |
|-----------------|---------------------|-----------------------|-----------------------|-----------------------------------|----------------------------------|-----------|
| 0               | 9.1                 | -0.1                  | 3.1                   | <b>12.1</b>                       | <b>21.5</b>                      | -331.4516 |
| 1               | 9.1                 | 0.2                   | 2.8                   | <b>12.1</b>                       | <b>21.5</b>                      | -351.8688 |
| 2               | 8.2                 | 0.01                  | 5.1                   | <b>13.3</b>                       | <b>21.5</b>                      | -332.1461 |
| 3               | 13.5                | -0.4                  | 0.7                   | <b>13.8</b>                       | <b>21.5</b>                      | -341.4854 |
| 4               | 9                   | -0.2                  | 1.8                   | <b>10.6</b>                       | <b>21.5</b>                      | -332.1585 |
| 5               | 10.3                | 0.01                  | 2.1                   | <b>12.4</b>                       | <b>21.5</b>                      | -350.3726 |
| 6               | 19.4                | -1.5                  | -4.1                  | <b>13.8</b>                       | <b>21.5</b>                      | -349.6627 |
| 7               | 18.3                | -1.7                  | -4.2                  | <b>12.4</b>                       | <b>21.5</b>                      | -351.3161 |
| 8               | 19                  | -1.2                  | -2.8                  | <b>15</b>                         | <b>21.5</b>                      | -349.729  |

<sup>a</sup> All energies are shown in kcal mol<sup>-1</sup>, and vibrational frequencies are shown in cm<sup>-1</sup>.  $\Delta E^\ddagger$ ,  $\Delta ZPE^\ddagger$  and  $-T\Delta S^\ddagger$  denote the contributions to  $\Delta G^\ddagger_{\text{calc}}$  from the electronic energy, zero-point energy and activation free energy, respectively.  $\nu$  denotes the first vibrational frequency.  $\Delta G^\ddagger_{\text{exp}}$  denotes the experimental activation free energy at 313.15 K, obtained from the kinetic data presented in ref. <sup>2</sup> using transition state theory.

**Table S3.** Energy decomposition of the calculated activation free energies ( $\Delta G^\ddagger_{\text{calc}}$ ) for the alkaline hydrolysis of 4-nitrophenyl sulfate in the presence of 0 to 8 additional explicit water molecules, obtained using the M062X<sup>4</sup> functional.<sup>a</sup>

| Water Molecules | $\Delta E^\ddagger$ | $\Delta ZPE^\ddagger$ | $-T\Delta S^\ddagger$ | $\Delta G^\ddagger_{\text{calc}}$ | $\Delta G^\ddagger_{\text{exp}}$ | $\nu$     |
|-----------------|---------------------|-----------------------|-----------------------|-----------------------------------|----------------------------------|-----------|
| 0               | 7.5                 | 0.1                   | 2.7                   | <b>10.3</b>                       | <b>21.5</b>                      | -316.6842 |
| 1               | 8.5                 | 0.5                   | 2.2                   | <b>10.7</b>                       | <b>21.5</b>                      | -298.9999 |
| 2               | 6.3                 | 0.5                   | 4.0                   | <b>10.8</b>                       | <b>21.5</b>                      | -292.9074 |
| 3               | 9.5                 | 0.03                  | 1.1                   | <b>10.6</b>                       | <b>21.5</b>                      | -286.9348 |
| 4               | 11.0                | -0.4                  | 0.01                  | <b>10.6</b>                       | <b>21.5</b>                      | -287.6699 |
| 5               | 10                  | -0.6                  | -1.9                  | <b>7.5</b>                        | <b>21.5</b>                      | -277.9046 |
| 6               | 8.7                 | 0.6                   | 0.7                   | <b>10</b>                         | <b>21.5</b>                      | -278.046  |
| 7               | 15.1                | 0.01                  | -1.7                  | <b>13.4</b>                       | <b>21.5</b>                      | -279.0495 |
| 8               | 8.2                 | 0.3                   | 0.7                   | <b>9.2</b>                        | <b>21.5</b>                      | -283.7645 |

<sup>a</sup> All energies are shown in kcal mol<sup>-1</sup>, and vibrational frequencies are shown in cm<sup>-1</sup>.  $\Delta E^\ddagger$ ,  $\Delta ZPE^\ddagger$  and  $-T\Delta S^\ddagger$  denote the contributions to  $\Delta G^\ddagger_{\text{calc}}$  from the electronic energy, zero-point energy and activation free energy, respectively.  $\nu$  denotes the first vibrational frequency.  $\Delta G^\ddagger_{\text{exp}}$  denotes the experimental activation free energy at 313.15 K, obtained from the kinetic data presented in ref. <sup>2</sup> using transition state theory.

**Table S4.** Experimental and calculated rate constants for the alkaline hydrolysis of 4-nitrophenyl sulfate in the presence of 0 to 8 additional explicit water molecules, obtained using the  $\omega$ B97X-D<sup>3</sup> functional.<sup>a</sup>

| <b>Water Molecules</b> | <b><math>k_{\text{calc}}</math></b> | <b><math>\log k_{\text{calc}}</math></b> | <b><math>\log k_{\text{exp}}</math></b> |
|------------------------|-------------------------------------|------------------------------------------|-----------------------------------------|
| 0                      | $1.090 \times 10^3$                 | 3.0374                                   | -3.9706                                 |
| 1                      | $1.148 \times 10^2$                 | 2.0599                                   | -3.9706                                 |
| 2                      | $3.339 \times 10^0$                 | 0.5236                                   | -3.9706                                 |
| 3                      | $3.724 \times 10^1$                 | 1.5710                                   | -3.9706                                 |
| 4                      | $5.728 \times 10^2$                 | 2.7580                                   | -3.9706                                 |
| 5                      | $4.373 \times 10^1$                 | 1.6408                                   | -3.9706                                 |
| 6                      | $9.228 \times 10^{-1}$              | -0.0349                                  | -3.9706                                 |
| 7                      | $7.900 \times 10^2$                 | 2.8976                                   | -3.9706                                 |
| 8                      | $3.922 \times 10^0$                 | 0.5935                                   | -3.9706                                 |

<sup>a</sup> The calculated rate constant,  $k_{\text{calc}}$ , was derived from the calculated activation free energy,  $\Delta G^\ddagger$ , at 313.15 K, using transition state theory. The corresponding experimental value was obtained from ref. <sup>2</sup> after correcting the experimental second order rate constant by  $0.017 \text{ M}^{-1}$  to take into account the entropic cost of bringing the reacting fragments into the encounter complex, following ref. <sup>6</sup>.

**Table S5.** Experimental and calculated rate constants for the alkaline hydrolysis of 4-nitrophenyl sulfate in the presence of 0 to 8 additional explicit water molecules, obtained using the M11L<sup>1</sup> functional.<sup>a</sup>

| <b>Water Molecules</b> | <b><math>k_{\text{calc}}</math></b> | <b><math>\log k_{\text{calc}}</math></b> | <b><math>\log k_{\text{exp}}</math></b> |
|------------------------|-------------------------------------|------------------------------------------|-----------------------------------------|
| 0                      | $2.311 \times 10^4$                 | 4.3638                                   | -3.9706                                 |
| 1                      | $7.501 \times 10^3$                 | 3.8751                                   | -3.9706                                 |
| 2                      | $3.356 \times 10^3$                 | 3.5258                                   | -3.9706                                 |
| 3                      | $1.503 \times 10^3$                 | 3.1770                                   | -3.9706                                 |
| 4                      | $2.578 \times 10^5$                 | 5.4113                                   | -3.9706                                 |
| 5                      | $1.427 \times 10^4$                 | 4.1544                                   | -3.9706                                 |
| 6                      | $1.503 \times 10^3$                 | 3.1770                                   | -3.9706                                 |
| 7                      | $1.427 \times 10^4$                 | 4.1544                                   | -3.9706                                 |
| 8                      | $2.183 \times 10^2$                 | 2.3391                                   | -3.9706                                 |

<sup>a</sup> The calculated rate constant,  $k_{\text{calc}}$ , was derived from the calculated activation free energy,  $\Delta G^\ddagger$ , at 313.15 K, using transition state theory. The corresponding experimental value was obtained from ref. <sup>2</sup> after correcting the experimental second order rate constant by  $0.017 \text{ M}^{-1}$  to take into account the entropic cost of bringing the reacting fragments into the encounter complex, following ref. <sup>6</sup>.



**Table S6.** Experimental and calculated rate constants for the alkaline hydrolysis of 4-nitrophenyl sulfate in the presence of 0 to 8 additional explicit water molecules, obtained using the M062X<sup>4</sup> functional.<sup>a</sup>

| <b>Water Molecules</b> | <b><math>k_{\text{calc}}</math></b> | <b><math>\log k_{\text{calc}}</math></b> | <b><math>\log k_{\text{exp}}</math></b> |
|------------------------|-------------------------------------|------------------------------------------|-----------------------------------------|
| 0                      | $4.175 \times 10^5$                 | 5.6207                                   | -3.9706                                 |
| 1                      | $2.195 \times 10^5$                 | 5.3414                                   | -3.9706                                 |
| 2                      | $1.869 \times 10^5$                 | 5.2716                                   | -3.9706                                 |
| 3                      | $2.578 \times 10^5$                 | 5.4113                                   | -3.9706                                 |
| 4                      | $2.578 \times 10^5$                 | 5.4113                                   | -3.9706                                 |
| 5                      | $3.765 \times 10^7$                 | 7.5758                                   | -3.9706                                 |
| 6                      | $6.763 \times 10^5$                 | 5.8301                                   | -3.9706                                 |
| 7                      | $2.073 \times 10^3$                 | 3.3166                                   | -3.9706                                 |
| 8                      | $2.448 \times 10^6$                 | 6.3889                                   | -3.9706                                 |

<sup>a</sup> The calculated rate constant,  $k_{\text{calc}}$ , was derived from the calculated activation free energy,  $\Delta G^\ddagger$ , at 313.15 K, using transition state theory. The corresponding experimental value was obtained from ref. <sup>2</sup> after correcting the experimental second order rate constant by  $0.017 \text{ M}^{-1}$  to take into account the entropic cost of bringing the reacting fragments into the encounter complex, following ref. <sup>6</sup>.

**Table S7.** Absolute and relative energy contributions to the calculated free energies ( $\Delta G_{\text{calc}}$ ) for the alkaline hydrolysis of 4-nitrophenyl sulfate in the presence of 0 to 8 additional explicit water molecules, obtained using the  $\omega$ B97X-D<sup>3</sup> functional.<sup>a</sup>

| <b>0 waters</b> | <b>E</b>      | <b>ZPE</b> | <b>S</b> | <b><math>\Delta E</math></b> | <b><math>\Delta ZPE</math></b> | <b><math>-T\Delta S</math></b> | <b><math>\Delta G_{\text{calc}}</math></b> | <b><math>v</math></b> |
|-----------------|---------------|------------|----------|------------------------------|--------------------------------|--------------------------------|--------------------------------------------|-----------------------|
| RS              | -1442.7105877 | 135.50586  | 153.837  | 0.0                          | 0.0                            | 0.0                            | 0.0                                        | 27.865                |
| TS              | -1442.6936351 | 135.68108  | 143.642  | 10.6                         | 0.2                            | 3.2                            | 14.0                                       | -269.6541             |
| PS              | -1442.7620338 | 135.88209  | 156.698  | -32.3                        | 0.4                            | -0.9                           | -32.8                                      | 2.5343                |
| <b>1 water</b>  | <b>E</b>      | <b>ZPE</b> | <b>S</b> | <b><math>\Delta E</math></b> | <b><math>\Delta ZPE</math></b> | <b><math>-T\Delta S</math></b> | <b><math>\Delta G_{\text{calc}}</math></b> | <b><math>v</math></b> |
| RS              | -1519.1725361 | 150.27362  | 171.609  | 0.0                          | 0.0                            | 0.0                            | 0.0                                        | 10.226                |
| TS              | -1519.1536605 | 150.71761  | 161.301  | 11.8                         | 0.4                            | 3.2                            | 15.4                                       | -273.9228             |
| PS              | -1519.2144700 | 150.92204  | 170.623  | -26.3                        | 0.6                            | 0.3                            | -25.4                                      | 18.9027               |
| <b>2 waters</b> | <b>E</b>      | <b>ZPE</b> | <b>S</b> | <b><math>\Delta E</math></b> | <b><math>\Delta ZPE</math></b> | <b><math>-T\Delta S</math></b> | <b><math>\Delta G_{\text{calc}}</math></b> | <b><math>v</math></b> |
| RS              | -1595.6332193 | 166.11857  | 180.725  | 0.0                          | 0.0                            | 0.0                            | 0.0                                        | 22.0334               |
| TS              | -1595.6054962 | 165.73854  | 178.694  | 17.4                         | -0.4                           | 0.6                            | 17.6                                       | -289.4289             |
| PS              | -1595.6744573 | 166.80655  | 181.284  | -25.9                        | 0.7                            | -0.2                           | -25.4                                      | 17.7028               |
| <b>3 waters</b> | <b>E</b>      | <b>ZPE</b> | <b>S</b> | <b><math>\Delta E</math></b> | <b><math>\Delta ZPE</math></b> | <b><math>-T\Delta S</math></b> | <b><math>\Delta G_{\text{calc}}</math></b> | <b><math>v</math></b> |
| RS              | -1672.0867685 | 181.02450  | 200.557  | 0.0                          | 0.0                            | 0.0                            | 0.0                                        | 16.8582               |
| TS              | -1672.0636513 | 180.93808  | 195.097  | 14.5                         | -0.1                           | 1.7                            | 16.1                                       | -275.8035             |
| PS              | -1672.1371688 | 182.14724  | 195.756  | -31.6                        | 1.1                            | 1.5                            | -29.0                                      | 12.69610              |
| <b>4 waters</b> | <b>E</b>      | <b>ZPE</b> | <b>S</b> | <b><math>\Delta E</math></b> | <b><math>\Delta ZPE</math></b> | <b><math>-T\Delta S</math></b> | <b><math>\Delta G_{\text{calc}}</math></b> | <b><math>v</math></b> |
| RS              | -1748.5825985 | 197.83378  | 209.165  | -28.4                        | 1.7                            | 2.4                            | -24.3                                      | 20.5039               |
| TS              | -1748.5825985 | 197.83378  | 209.165  | -28.4                        | 1.7                            | 2.4                            | -24.3                                      | 20.5039               |
| PS              | -1748.5825985 | 197.83378  | 209.165  | -28.4                        | 1.7                            | 2.4                            | -24.3                                      | 20.5039               |
| <b>5 waters</b> | <b>E</b>      | <b>ZPE</b> | <b>S</b> | <b><math>\Delta E</math></b> | <b><math>\Delta ZPE</math></b> | <b><math>-T\Delta S</math></b> | <b><math>\Delta G_{\text{calc}}</math></b> | <b><math>v</math></b> |
| RS              | -1825.0023189 | 212.77408  | 222.328  | 0.0                          | 0.0                            | 0.0                            | 0.0                                        | 20.2906               |
| TS              | -1824.9701787 | 211.75014  | 232.606  | 20.2                         | -1.0                           | -3.2                           | 16.0                                       | -282.5629             |
| PS              | -1825.0481055 | 214.06832  | 220.043  | -28.7                        | 1.3                            | 0.7                            | -26.7                                      | 20.0403               |
| <b>6 waters</b> | <b>E</b>      | <b>ZPE</b> | <b>S</b> | <b><math>\Delta E</math></b> | <b><math>\Delta ZPE</math></b> | <b><math>-T\Delta S</math></b> | <b><math>\Delta G_{\text{calc}}</math></b> | <b><math>v</math></b> |
| RS              | -1901.4555423 | 227.69456  | 243.654  | 0.0                          | 0.0                            | 0.0                            | 0.0                                        | 9.0437                |
| TS              | -1901.4226068 | 226.84023  | 248.15   | 20.7                         | -0.9                           | -1.4                           | 18.4                                       | -281.2544             |
| PS              | -1901.5139771 | 232.44189  | 221.155  | -36.7                        | 4.7                            | 7.0                            | -24.9                                      | 24.6981               |
| <b>7 waters</b> | <b>E</b>      | <b>ZPE</b> | <b>S</b> | <b><math>\Delta E</math></b> | <b><math>\Delta ZPE</math></b> | <b><math>-T\Delta S</math></b> | <b><math>\Delta G_{\text{calc}}</math></b> | <b><math>v</math></b> |
| RS              | -1977.9024920 | 243.68866  | 255.2    | 0.0                          | 0.0                            | 0.0                            | 0.0                                        | 13.77                 |
| TS              | -1977.8766201 | 243.11390  | 259.797  | 16.2                         | -0.6                           | -1.4                           | 14.2                                       | -282.4447             |
| PS              | -1977.9355331 | 243.31718  | 262.147  | -20.7                        | -0.4                           | -2.2                           | -23.3                                      | 19.0105               |

| <b>8 waters</b> | <b>E</b>      | <b>ZPE</b> | <b>S</b> | <b><math>\Delta E</math></b> | <b><math>\Delta ZPE</math></b> | <b><math>-T\Delta S</math></b> | <b><math>\Delta G_{\text{calc}}</math></b> | <b><math>\nu</math></b> |
|-----------------|---------------|------------|----------|------------------------------|--------------------------------|--------------------------------|--------------------------------------------|-------------------------|
| RS              | -2054.3572856 | 259.26468  | 268.855  | 0.0                          | 0.0                            | 0.0                            | 0.0                                        | 21.8354                 |
| TS              | -2054.3298017 | 259.00254  | 267.27   | 17.2                         | -0.3                           | 0.5                            | 17.5                                       | -281.4245               |
| PS              | -2054.4203233 | 262.31221  | 258.444  | -39.6                        | 3.0                            | 3.3                            | -33.2                                      | 20.8432                 |

<sup>a</sup> RS, TS and PS denote the reactant, transition and product states, respectively. E, ZPE and S denote the absolute electronic energies, zero-point energies and entropies, and  $\Delta E$ ,  $\Delta ZPE$  and  $-T\Delta S$  denote the corresponding values relative to the RS (all values in kcal mol<sup>-1</sup>, except S which is presented in cal mol<sup>-1</sup> K<sup>-1</sup>).  $\nu$  denotes the first vibrational frequency (cm<sup>-1</sup>).

**Table S8.** Absolute and relative energy contributions to the calculated free energies ( $\Delta G_{\text{calc}}$ ) for the alkaline hydrolysis of 4-nitrophenyl sulfate in the presence of 0 to 8 additional explicit water molecules, obtained using the M11L<sup>1</sup> functional.<sup>a</sup>

| <b>0 waters</b> | <b>E</b>      | <b>ZPE</b> | <b>S</b> | <b><math>\Delta E</math></b> | <b><math>\Delta ZPE</math></b> | <b><math>-T\Delta S</math></b> | <b><math>\Delta G_{\text{calc}}</math></b> | <b><math>\nu</math></b> |
|-----------------|---------------|------------|----------|------------------------------|--------------------------------|--------------------------------|--------------------------------------------|-------------------------|
| RS              | -1442.7758730 | 132.60756  | 153.934  | 0.0                          | 0.0                            | 0.0                            | 0.0                                        | 26.0193                 |
| TS              | -1442.7614408 | 132.52363  | 144.06   | 9.1                          | -0.1                           | 3.1                            | 12.1                                       | -331.4516               |
| PS              | -1442.8369596 | 133.54658  | 154.348  | -38.3                        | 0.9                            | -0.1                           | -37.5                                      | 20.0531                 |
| <b>1 water</b>  | <b>E</b>      | <b>ZPE</b> | <b>S</b> | <b><math>\Delta E</math></b> | <b><math>\Delta ZPE</math></b> | <b><math>-T\Delta S</math></b> | <b><math>\Delta G_{\text{calc}}</math></b> | <b><math>\nu</math></b> |
| RS              | -1519.2322701 | 147.70918  | 171.123  | 0.0                          | 0.0                            | 0.0                            | 0.0                                        | 20.9616                 |
| TS              | -1519.2178372 | 147.87940  | 162.067  | 9.1                          | 0.2                            | 2.8                            | 12.1                                       | -351.8688               |
| PS              | -1519.2860610 | 148.03910  | 177.37   | -33.8                        | 0.3                            | -2.0                           | -35.4                                      | 13.5424                 |
| <b>2 waters</b> | <b>E</b>      | <b>ZPE</b> | <b>S</b> | <b><math>\Delta E</math></b> | <b><math>\Delta ZPE</math></b> | <b><math>-T\Delta S</math></b> | <b><math>\Delta G_{\text{calc}}</math></b> | <b><math>\nu</math></b> |
| RS              | -1595.6796661 | 162.80622  | 192.494  | 0.0                          | 0.0                            | 0.0                            | 0.0                                        | 17.8855                 |
| TS              | -1595.6665795 | 162.81241  | 176.348  | 8.2                          | 0.01                           | 5.1                            | 13.3                                       | -332.1461               |
| PS              | -1595.7381136 | 163.80171  | 189.695  | -36.7                        | 1.0                            | 0.9                            | -34.8                                      | 16.8895                 |
| <b>3 waters</b> | <b>E</b>      | <b>ZPE</b> | <b>S</b> | <b><math>\Delta E</math></b> | <b><math>\Delta ZPE</math></b> | <b><math>-T\Delta S</math></b> | <b><math>\Delta G_{\text{calc}}</math></b> | <b><math>\nu</math></b> |
| RS              | -1672.1435071 | 179.18847  | 197.149  | 0.0                          | 0.0                            | 0.0                            | 0.0                                        | 14.1686                 |
| TS              | -1672.1220323 | 178.77017  | 195.019  | 13.5                         | -0.4                           | 0.7                            | 13.8                                       | -341.4854               |
| PS              | -1672.1899994 | 178.86475  | 206.643  | -29.2                        | -0.3                           | -3.0                           | -32.5                                      | 19.8945                 |
| <b>4 waters</b> | <b>E</b>      | <b>ZPE</b> | <b>S</b> | <b><math>\Delta E</math></b> | <b><math>\Delta ZPE</math></b> | <b><math>-T\Delta S</math></b> | <b><math>\Delta G_{\text{calc}}</math></b> | <b><math>\nu</math></b> |
| RS              | -1748.5846590 | 193.92064  | 221.836  | 0.0                          | 0.0                            | 0.0                            | 0.0                                        | 18.1209                 |
| TS              | -1748.5702951 | 193.69953  | 215.956  | 9.0                          | -0.2                           | 1.8                            | 10.6                                       | -332.1585               |
| PS              | -1748.6433847 | 194.01429  | 226.487  | -36.9                        | 0.1                            | -1.5                           | -38.2                                      | 13.0271                 |
| <b>5 waters</b> | <b>E</b>      | <b>ZPE</b> | <b>S</b> | <b><math>\Delta E</math></b> | <b><math>\Delta ZPE</math></b> | <b><math>-T\Delta S</math></b> | <b><math>\Delta G_{\text{calc}}</math></b> | <b><math>\nu</math></b> |
| RS              | -1825.0394562 | 209.29003  | 241.707  | 0.0                          | 0.0                            | 0.0                            | 0.0                                        | 13.5004                 |
| TS              | -1825.0230855 | 209.30180  | 234.984  | 10.3                         | 0.01                           | 2.1                            | 12.4                                       | -350.3726               |
| PS              | -1825.0927422 | 211.46170  | 234.019  | -33.4                        | 2.2                            | 2.4                            | -28.9                                      | 11.3288                 |
| <b>6 waters</b> | <b>E</b>      | <b>ZPE</b> | <b>S</b> | <b><math>\Delta E</math></b> | <b><math>\Delta ZPE</math></b> | <b><math>-T\Delta S</math></b> | <b><math>\Delta G_{\text{calc}}</math></b> | <b><math>\nu</math></b> |
| RS              | -1901.5036073 | 226.17852  | 241.632  | 0.0                          | 0.0                            | 0.0                            | 0.0                                        | 16.054                  |
| TS              | -1901.4726305 | 224.63579  | 254.622  | 19.4                         | -1.5                           | -4.1                           | 13.8                                       | -349.6627               |
| PS              | -1901.5792210 | 229.84625  | 233.146  | -47.4                        | 3.7                            | 2.7                            | -41.1                                      | 11.0626                 |
| <b>7 waters</b> | <b>E</b>      | <b>ZPE</b> | <b>S</b> | <b><math>\Delta E</math></b> | <b><math>\Delta ZPE</math></b> | <b><math>-T\Delta S</math></b> | <b><math>\Delta G_{\text{calc}}</math></b> | <b><math>\nu</math></b> |
| RS              | -1977.9523154 | 242.09906  | 255.206  | 0.0                          | 0.0                            | 0.0                            | 0.0                                        | 16.2606                 |
| TS              | -1977.9231450 | 240.41600  | 268.595  | 18.3                         | -1.7                           | -4.2                           | 12.4                                       | -351.3161               |
| PS              | -1978.0181196 | 244.63820  | 247.676  | -41.3                        | 2.5                            | 2.4                            | -36.4                                      | -0.8686                 |

| <b>8 waters</b> | <b>E</b>      | <b>ZPE</b> | <b>S</b> | <b><math>\Delta E</math></b> | <b><math>\Delta ZPE</math></b> | <b><math>-T\Delta S</math></b> | <b><math>\Delta G_{\text{calc}}</math></b> | <b><math>\nu</math></b> |
|-----------------|---------------|------------|----------|------------------------------|--------------------------------|--------------------------------|--------------------------------------------|-------------------------|
| RS              | -2054.4041216 | 257.57639  | 270.968  | 0.0                          | 0.0                            | 0.0                            | 0.0                                        | 16.7626                 |
| TS              | -2054.3737914 | 256.36054  | 279.803  | 19.0                         | -1.2                           | -2.8                           | 15.0                                       | -349.729                |
| PS              | -2054.4710658 | 260.06720  | 267.761  | -42.0                        | 2.5                            | 1.0                            | -38.5                                      | 12.8992                 |

<sup>a</sup> RS, TS and PS denote the reactant, transition and product states, respectively. E, ZPE and S denote the absolute electronic energies, zero-point energies and entropies, and  $\Delta E$ ,  $\Delta ZPE$  and  $-T\Delta S$  denote the corresponding values relative to the RS (all values in kcal mol<sup>-1</sup>, except S which is presented in cal mol<sup>-1</sup> K<sup>-1</sup>).  $\nu$  denotes the first vibrational frequency (cm<sup>-1</sup>).

**Table S9.** Absolute and relative energy contributions to the calculated free energies ( $\Delta G_{\text{calc}}$ ) for the alkaline hydrolysis of 4-nitrophenyl sulfate in the presence of 0 to 8 additional explicit water molecules, obtained using the M062X<sup>4</sup> functional.<sup>a</sup>

| <b>0 waters</b> | <b>E</b>      | <b>ZPE</b> | <b>S</b> | <b><math>\Delta E</math></b> | <b><math>\Delta ZPE</math></b> | <b><math>-T\Delta S</math></b> | <b><math>\Delta G_{\text{calc}}</math></b> | <b>v</b>  |
|-----------------|---------------|------------|----------|------------------------------|--------------------------------|--------------------------------|--------------------------------------------|-----------|
| RS              | -1442.6434689 | 135.59843  | 151.311  | 0.0                          | 0.0                            | 0.0                            | 0.0                                        | 29.8035   |
| TS              | -1442.6315931 | 135.71633  | 142.807  | 7.5                          | 0.1                            | 2.7                            | 10.3                                       | -316.6842 |
| PS              | -1442.6973623 | 136.14742  | 147.904  | -33.8                        | 0.5                            | 1.1                            | -32.2                                      | 30.4802   |
| <b>1 water</b>  | <b>E</b>      | <b>ZPE</b> | <b>S</b> | <b><math>\Delta E</math></b> | <b><math>\Delta ZPE</math></b> | <b><math>-T\Delta S</math></b> | <b><math>\Delta G_{\text{calc}}</math></b> | <b>v</b>  |
| RS              | -1519.0940823 | 149.96617  | 167.101  | 0.0                          | 0.0                            | 0.0                            | 0.0                                        | 15.3596   |
| TS              | -1519.0813406 | 150.43057  | 160.043  | 8.0                          | 0.5                            | 2.2                            | 10.7                                       | -298.9999 |
| PS              | -1519.1352670 | 150.69595  | 171.254  | -25.8                        | 0.7                            | -1.3                           | -26.4                                      | 20.401    |
| <b>2 waters</b> | <b>E</b>      | <b>ZPE</b> | <b>S</b> | <b><math>\Delta E</math></b> | <b><math>\Delta ZPE</math></b> | <b><math>-T\Delta S</math></b> | <b><math>\Delta G_{\text{calc}}</math></b> | <b>v</b>  |
| RS              | -1595.1585719 | 164.92086  | 189.93   | 0.0                          | 0.0                            | 0.0                            | 0.0                                        | 15.3242   |
| TS              | -1595.1485956 | 165.40078  | 177.103  | 6.3                          | 0.5                            | 4.0                            | 10.8                                       | -292.9074 |
| PS              | -1595.2115938 | 166.56085  | 178.44   | -33.3                        | 1.6                            | 3.6                            | -28.0                                      | 21.2865   |
| <b>3 waters</b> | <b>E</b>      | <b>ZPE</b> | <b>S</b> | <b><math>\Delta E</math></b> | <b><math>\Delta ZPE</math></b> | <b><math>-T\Delta S</math></b> | <b><math>\Delta G_{\text{calc}}</math></b> | <b>v</b>  |
| RS              | -1671.9852185 | 180.84029  | 192.716  | 0.0                          | 0.0                            | 0.0                            | 0.0                                        | 15.0767   |
| TS              | -1671.9700944 | 180.87399  | 189.063  | 9.5                          | 0.03                           | 1.1                            | 10.6                                       | -286.9348 |
| PS              | -1672.0265242 | 182.07435  | 191.96   | -25.9                        | 1.2                            | 0.2                            | -24.4                                      | 24.4032   |
| <b>4 waters</b> | <b>E</b>      | <b>ZPE</b> | <b>S</b> | <b><math>\Delta E</math></b> | <b><math>\Delta ZPE</math></b> | <b><math>-T\Delta S</math></b> | <b><math>\Delta G_{\text{calc}}</math></b> | <b>v</b>  |
| RS              | -1748.4273098 | 196.06219  | 208.126  | 0.0                          | 0.0                            | 0.0                            | 0.0                                        | 21.9257   |
| TS              | -1748.4097162 | 195.70859  | 208.107  | 11.0                         | -0.4                           | 0.01                           | 10.6                                       | -287.6699 |
| PS              | -1748.4702918 | 197.12423  | 207.891  | -27.0                        | 1.1                            | 0.1                            | -25.8                                      | 25.862    |
| <b>5 waters</b> | <b>E</b>      | <b>ZPE</b> | <b>S</b> | <b><math>\Delta E</math></b> | <b><math>\Delta ZPE</math></b> | <b><math>-T\Delta S</math></b> | <b><math>\Delta G_{\text{calc}}</math></b> | <b>v</b>  |
| RS              | -1824.8700820 | 211.28808  | 226.274  | 0.0                          | 0.0                            | 0.0                            | 0.0                                        | 16.6705   |
| TS              | -1824.8541447 | 210.69593  | 232.445  | 10.0                         | -0.6                           | -1.9                           | 7.5                                        | -277.9046 |
| PS              | -1824.9274984 | 213.45421  | 223.182  | -36.0                        | 2.2                            | 1.0                            | -32.9                                      | 11.1737   |
| <b>6 waters</b> | <b>E</b>      | <b>ZPE</b> | <b>S</b> | <b><math>\Delta E</math></b> | <b><math>\Delta ZPE</math></b> | <b><math>-T\Delta S</math></b> | <b><math>\Delta G_{\text{calc}}</math></b> | <b>v</b>  |
| RS              | -1901.3121152 | 226.71693  | 239.679  | 0.0                          | 0.0                            | 0.0                            | 0.0                                        | 19.0124   |
| TS              | -1901.2982843 | 227.33679  | 237.594  | 8.7                          | 0.6                            | 0.7                            | 10.0                                       | -278.046  |
| PS              | -1901.3524776 | 228.28582  | 239.854  | -25.3                        | 1.6                            | -0.1                           | -23.8                                      | 16.8398   |
| <b>7 waters</b> | <b>E</b>      | <b>ZPE</b> | <b>S</b> | <b><math>\Delta E</math></b> | <b><math>\Delta ZPE</math></b> | <b><math>-T\Delta S</math></b> | <b><math>\Delta G_{\text{calc}}</math></b> | <b>v</b>  |
| RS              | -1977.7680384 | 243.84477  | 237.178  | 0.0                          | 0.0                            | 0.0                            | 0.0                                        | 22.6625   |
| TS              | -1977.7439931 | 243.85549  | 242.454  | 15.1                         | 0.01                           | -1.7                           | 13.4                                       | -279.0495 |
| PS              | -1977.7680384 | 245.60397  | 231.35   | 0.0                          | 1.8                            | 1.8                            | 3.6                                        | 25.1431   |

| <b>8 waters</b> | <b>E</b>      | <b>ZPE</b> | <b>S</b> | <b><math>\Delta E</math></b> | <b><math>\Delta ZPE</math></b> | <b><math>-T\Delta S</math></b> | <b><math>\Delta G_{\text{calc}}</math></b> | <b><math>\nu</math></b> |
|-----------------|---------------|------------|----------|------------------------------|--------------------------------|--------------------------------|--------------------------------------------|-------------------------|
| RS              | -2054.1986122 | 258.61012  | 261.306  | 0.0                          | 0.0                            | 0.0                            | 0.0                                        | 19.785                  |
| TS              | -2054.1855888 | 258.95387  | 258.979  | 8.2                          | 0.3                            | 0.7                            | 9.2                                        | -283.7645               |
| PS              | -2054.2672984 | 261.38123  | 250.497  | -43.1                        | 2.8                            | 3.4                            | -36.9                                      | 20.118                  |

<sup>a</sup> RS, TS and PS denote the reactant, transition and product states, respectively. E, ZPE and S denote the absolute electronic energies, zero-point energies and entropies, and  $\Delta E$ ,  $\Delta ZPE$  and  $-T\Delta S$  denote the corresponding values relative to the RS (all values in kcal mol<sup>-1</sup>, except S which is presented in cal mol<sup>-1</sup> K<sup>-1</sup>).  $\nu$  denotes the first vibrational frequency (cm<sup>-1</sup>).

**Table S10.** Partial charges at the transition state for the alkaline hydrolysis of 4-nitrophenyl sulfate in the presence of 0 to 8 additional explicit water molecules, obtained using the  $\omega$ B97X-D<sup>3</sup> functional.<sup>a</sup>

| <b>Water Molecules</b> | <b><math>O_{\text{nuc}}</math></b> | <b>S</b> | <b><math>O_{\text{lg}}</math></b> |
|------------------------|------------------------------------|----------|-----------------------------------|
| 0                      | -1.116133                          | 1.259782 | -0.58486                          |
| 1                      | -1.058482                          | 1.183376 | -0.533672                         |
| 2                      | -1.056234                          | 1.117773 | -0.4649                           |
| 3                      | -0.918205                          | 1.129663 | -0.504537                         |
| 4                      | -0.903971                          | 1.094185 | -0.427313                         |
| 5                      | -0.630151                          | 0.977564 | -0.411007                         |
| 6                      | -0.642337                          | 1.028546 | -0.400772                         |
| 7                      | -0.78432                           | 1.333445 | -0.536905                         |
| 8                      | -0.808109                          | 1.375266 | -0.539817                         |

<sup>a</sup> Partial charges are calculated using the CHELPG<sup>5</sup> charge calculation scheme, as described in the **Methodology** section.

**Table S11.** Partial charges at the transition state for the alkaline hydrolysis of 4-nitrophenyl sulfate in the presence of 0 to 8 additional explicit water molecules, obtained using the M11L<sup>1</sup> functional.<sup>a</sup>

| Water Molecules | O <sub>nuc</sub> | S        | O <sub>lg</sub> |
|-----------------|------------------|----------|-----------------|
| 0               | -1.128893        | 1.244377 | -0.588531       |
| 1               | -1.044112        | 1.218874 | -0.549157       |
| 2               | -1.048351        | 1.173881 | -0.508858       |
| 3               | -0.923554        | 1.12593  | -0.495079       |
| 4               | -0.922275        | 1.035309 | -0.383091       |
| 5               | -0.586031        | 0.902254 | -0.368954       |
| 6               | -0.696526        | 1.02064  | -0.397964       |
| 7               | -0.771277        | 0.989932 | -0.41659        |
| 8               | -0.809259        | 1.14282  | -0.477867       |

<sup>a</sup> Partial charges are calculated using the CHELPG<sup>5</sup> charge calculation scheme, as described in the **Methodology** section.

**Table S12.** Partial charges at the transition state for the alkaline hydrolysis of 4-nitrophenyl sulfate in the presence of 0 to 8 additional explicit water molecules, obtained using the M062X<sup>4</sup> functional.<sup>a</sup>

| Water Molecules | O <sub>nuc</sub> | S        | O <sub>lg</sub> |
|-----------------|------------------|----------|-----------------|
| 0               | -1.139127        | 1.250009 | -0.560361       |
| 1               | -1.03667         | 1.223303 | -0.532325       |
| 2               | -1.048017        | 1.195557 | -0.504796       |
| 3               | -0.985903        | 1.174767 | -0.507501       |
| 4               | -0.959323        | 1.082878 | -0.417571       |
| 5               | -0.739218        | 0.961012 | -0.429012       |
| 6               | -0.800466        | 1.074493 | -0.466512       |
| 7               | -0.78432         | 1.333445 | -0.536905       |
| 8               | -0.854524        | 1.254148 | -0.535374       |

<sup>a</sup> Partial charges are calculated using the CHELPG<sup>5</sup> charge calculation scheme, as described in the **Methodology** section.



**Table S13.** Partial charges at key stationary points for the alkaline hydrolysis of 4-nitrophenyl sulfate in the presence of 0 to 8 additional explicit water molecules, obtained using the  $\omega$ B97X-D<sup>3</sup> functional.<sup>a</sup>

| <b>0 waters</b> | <b>O<sub>nuc</sub></b> | <b>S</b> | <b>O<sub>lg</sub></b> |
|-----------------|------------------------|----------|-----------------------|
| RS              | -1.296563              | 1.12486  | -0.391163             |
| TS              | -1.116133              | 1.259782 | -0.58486              |
| PS              | -0.537492              | 1.114613 | -0.804766             |
| <b>1 water</b>  | <b>O<sub>nuc</sub></b> | <b>S</b> | <b>O<sub>lg</sub></b> |
| RS              | -1.196337              | 1.194745 | -0.425358             |
| TS              | -1.058482              | 1.183376 | -0.533672             |
| PS              | -0.489962              | 1.081848 | -0.804228             |
| <b>2 waters</b> | <b>O<sub>nuc</sub></b> | <b>S</b> | <b>O<sub>lg</sub></b> |
| RS              | -1.135373              | 1.179743 | -0.392427             |
| TS              | -1.056234              | 1.117773 | -0.4649               |
| PS              | -0.521243              | 1.113486 | -0.801443             |
| <b>3 waters</b> | <b>O<sub>nuc</sub></b> | <b>S</b> | <b>O<sub>lg</sub></b> |
| RS              | -1.257745              | 1.129588 | -0.403099             |
| TS              | -0.918205              | 1.129663 | -0.504537             |
| PS              | -0.548219              | 1.053739 | -0.803563             |
| <b>4 waters</b> | <b>O<sub>nuc</sub></b> | <b>S</b> | <b>O<sub>lg</sub></b> |
| RS              | -1.236077              | 1.037997 | -0.390759             |
| TS              | -0.903971              | 1.094185 | -0.427313             |
| PS              | -0.903971              | 1.094185 | -0.427313             |
| <b>5 waters</b> | <b>O<sub>nuc</sub></b> | <b>S</b> | <b>O<sub>lg</sub></b> |
| RS              | -0.980929              | 1.211486 | -0.373893             |
| TS              | -0.630151              | 0.977564 | -0.411007             |
| PS              | -0.512696              | 0.939546 | -0.604445             |
| <b>6 waters</b> | <b>O<sub>nuc</sub></b> | <b>S</b> | <b>O<sub>lg</sub></b> |
| RS              | -0.940799              | 1.179333 | -0.384711             |
| TS              | -0.642337              | 1.028546 | -0.400772             |
| PS              | -0.56652               | 1.087845 | -0.766095             |
| <b>7 waters</b> | <b>O<sub>nuc</sub></b> | <b>S</b> | <b>O<sub>lg</sub></b> |
| RS              | -0.940799              | 1.235601 | -0.396755             |
| TS              | -0.642337              | 1.333445 | -0.536905             |
| PS              | -0.56652               | 1.00144  | -0.749296             |

| <b>8 waters</b> | <b>O<sub>nuc</sub></b> | <b>S</b> | <b>O<sub>lg</sub></b> |
|-----------------|------------------------|----------|-----------------------|
| RS              | -1.016168              | 1.025112 | -0.394967             |
| TS              | -0.808109              | 1.375266 | -0.539817             |
| PS              | -0.551013              | 0.968566 | -0.730409             |

<sup>a</sup> RS, TS and PS denote the reactant, transition and product states, respectively. Partial charges are calculated using the CHELPG<sup>5</sup> charge calculation scheme, as described in the **Methodology** section.

**Table S14.** Partial charges at key stationary points for the alkaline hydrolysis of 4-nitrophenyl sulfate in the presence of 0 to 8 additional explicit water molecules, obtained using the M11L<sup>1</sup> functional.<sup>a</sup>

| <b>0 waters</b> | <b>O<sub>nuc</sub></b> | <b>S</b> | <b>O<sub>lg</sub></b> |
|-----------------|------------------------|----------|-----------------------|
| RS              | -1.284482              | 1.080957 | -0.379139             |
| TS              | -1.128893              | 1.244377 | -0.588531             |
| PS              | -0.585248              | 1.238508 | -0.772942             |
| <b>1 water</b>  | <b>O<sub>nuc</sub></b> | <b>S</b> | <b>O<sub>lg</sub></b> |
| RS              | -1.185066              | 1.082782 | -0.379663             |
| TS              | -1.044112              | 1.218874 | -0.549157             |
| PS              | -0.586398              | 1.153452 | -0.782941             |
| <b>2 waters</b> | <b>O<sub>nuc</sub></b> | <b>S</b> | <b>O<sub>lg</sub></b> |
| RS              | -1.188192              | 1.032376 | -0.357577             |
| TS              | -1.048351              | 1.173881 | -0.508858             |
| PS              | -0.546385              | 1.050097 | -0.769466             |
| <b>3 waters</b> | <b>O<sub>nuc</sub></b> | <b>S</b> | <b>O<sub>lg</sub></b> |
| RS              | -1.277522              | 1.181599 | -0.402934             |
| TS              | -0.923554              | 1.12593  | -0.495079             |
| PS              | -0.388704              | 0.873864 | -0.789278             |
| <b>4 waters</b> | <b>O<sub>nuc</sub></b> | <b>S</b> | <b>O<sub>lg</sub></b> |
| RS              | -1.247046              | 0.996753 | -0.367373             |
| TS              | -0.922275              | 1.035309 | -0.383091             |
| PS              | -0.360786              | 0.822035 | -0.70989              |
| <b>5 waters</b> | <b>O<sub>nuc</sub></b> | <b>S</b> | <b>O<sub>lg</sub></b> |
| RS              | -0.853296              | 1.037227 | -0.416884             |
| TS              | -0.586031              | 0.902254 | -0.368954             |
| PS              | -0.44271               | 1.014201 | -0.788907             |
| <b>6 waters</b> | <b>O<sub>nuc</sub></b> | <b>S</b> | <b>O<sub>lg</sub></b> |
| RS              | -1.121692              | 1.198191 | -0.432918             |
| TS              | -0.696526              | 1.02064  | -0.397964             |
| PS              | -0.504618              | 0.985203 | -0.657411             |
| <b>7 waters</b> | <b>O<sub>nuc</sub></b> | <b>S</b> | <b>O<sub>lg</sub></b> |
| RS              | -1.096003              | 0.833178 | -0.308632             |
| TS              | -0.771277              | 0.989932 | -0.41659              |
| PS              | -0.635188              | 1.193023 | -0.654072             |

| <b>8 waters</b> | <b>O<sub>nuc</sub></b> | <b>S</b> | <b>O<sub>lg</sub></b> |
|-----------------|------------------------|----------|-----------------------|
| RS              | -1.195468              | 0.879597 | -0.324804             |
| TS              | -0.809259              | 1.14282  | -0.477867             |
| PS              | -0.352874              | 0.977358 | -0.666439             |

<sup>a</sup> RS, TS and PS denote the reactant, transition and product states, respectively. Partial charges are calculated using the CHELPG<sup>5</sup> charge calculation scheme, as described in the **Methodology** section.

**Table S15.** Partial charges at key stationary points for the alkaline hydrolysis of 4-nitrophenyl sulfate in the presence of 0 to 8 additional explicit water molecules, obtained using the M062X<sup>4</sup> functional.<sup>a</sup>

| <b>0 waters</b> | <b>O<sub>nuc</sub></b> | <b>S</b> | <b>O<sub>lg</sub></b> |
|-----------------|------------------------|----------|-----------------------|
| RS              | -1.275519              | 1.121414 | -0.387754             |
| TS              | -1.139127              | 1.250009 | -0.560361             |
| PS              | -0.558318              | 1.13009  | -0.804851             |
| <b>1 water</b>  | <b>O<sub>nuc</sub></b> | <b>S</b> | <b>O<sub>lg</sub></b> |
| RS              | -1.148959              | 1.152355 | -0.413929             |
| TS              | -1.03667               | 1.223303 | -0.532325             |
| PS              | -0.670233              | 1.137449 | -0.803401             |
| <b>2 waters</b> | <b>O<sub>nuc</sub></b> | <b>S</b> | <b>O<sub>lg</sub></b> |
| RS              | -1.174682              | 1.064808 | -0.358528             |
| TS              | -1.048017              | 1.195557 | -0.504796             |
| PS              | -0.454976              | 1.055828 | -0.814666             |
| <b>3 waters</b> | <b>O<sub>nuc</sub></b> | <b>S</b> | <b>O<sub>lg</sub></b> |
| RS              | -1.233141              | 1.143523 | -0.421993             |
| TS              | -0.985903              | 1.174767 | -0.507501             |
| PS              | -0.482625              | 1.051778 | -0.824693             |
| <b>4 waters</b> | <b>O<sub>nuc</sub></b> | <b>S</b> | <b>O<sub>lg</sub></b> |
| RS              | -1.238816              | 1.009553 | -0.39931              |
| TS              | -0.959323              | 1.082878 | -0.417571             |
| PS              | -0.455648              | 1.027233 | -0.76437              |
| <b>5 waters</b> | <b>O<sub>nuc</sub></b> | <b>S</b> | <b>O<sub>lg</sub></b> |
| RS              | -1.058445              | 0.812448 | -0.20884              |
| TS              | -0.739218              | 0.961012 | -0.429012             |
| PS              | -0.409062              | 0.919341 | -0.726438             |
| <b>6 waters</b> | <b>O<sub>nuc</sub></b> | <b>S</b> | <b>O<sub>lg</sub></b> |
| RS              | -1.053489              | 0.999697 | -0.303922             |
| TS              | -0.800466              | 1.074493 | -0.466512             |
| PS              | -0.571694              | 1.024421 | -0.758974             |
| <b>7 waters</b> | <b>O<sub>nuc</sub></b> | <b>S</b> | <b>O<sub>lg</sub></b> |
| RS              | -0.815996              | 1.331497 | -0.466748             |
| TS              | -0.846032              | 1.137617 | -0.497321             |
| PS              | -0.568987              | 1.062263 | -0.79949              |

| <b>8 waters</b> | <b>O<sub>nuc</sub></b> | <b>S</b> | <b>O<sub>lg</sub></b> |
|-----------------|------------------------|----------|-----------------------|
| RS              | -0.964724              | 1.12928  | -0.397992             |
| TS              | -0.854524              | 1.254148 | -0.535374             |
| PS              | -0.621103              | 1.146464 | -0.805452             |

<sup>a</sup> RS, TS and PS denote the reactant, transition and product states, respectively. Partial charges are calculated using the CHELPG<sup>5</sup> charge calculation scheme, as described in the **Methodology** section.

**Table S16.** Geometries at the transition state for the alkaline hydrolysis of 4-nitrophenyl sulfate in the presence of 0 to 8 additional explicit water molecules, obtained using the  $\omega$ B97X-D<sup>3</sup> functional.<sup>a</sup>

| <b>Water Molecules</b> | <b>S-O<sub>nuc</sub> Distance</b> | <b>S-O<sub>lg</sub> Distance</b> | <b>S-O<sub>nuc</sub> BO</b> | <b>S-O<sub>lg</sub> BO</b> |
|------------------------|-----------------------------------|----------------------------------|-----------------------------|----------------------------|
| 0                      | 2.35                              | 1.71                             | 0.2639                      | 0.5569                     |
| 1                      | 2.30                              | 1.71                             | 0.2515                      | 0.5641                     |
| 2                      | 2.32                              | 1.72                             | 0.2456                      | 0.5485                     |
| 3                      | 2.27                              | 1.73                             | 0.2333                      | 0.5505                     |
| 4                      | 2.30                              | 1.73                             | 0.2242                      | 0.5336                     |
| 5                      | 2.23                              | 1.74                             | 0.2359                      | 0.5244                     |
| 6                      | 2.24                              | 1.74                             | 0.2399                      | 0.5334                     |
| 7                      | 2.24                              | 1.73                             | 0.2458                      | 0.5488                     |
| 8                      | 2.26                              | 1.73                             | 0.2506                      | 0.5523                     |

<sup>a</sup> Bond distances are shown in Å. Bond orders (BO) were calculated based on the Wiberg bond index<sup>7</sup> using natural bond orbital (NBO) analysis.<sup>8</sup>

**Table S17.** Geometries at the transition state for the alkaline hydrolysis of 4-nitrophenyl sulfate in the presence of 0 to 8 additional explicit water molecules, obtained using the M11L<sup>1</sup> functional.<sup>a</sup>

| Water Molecules | S-O <sub>nuc</sub> Distance | S-O <sub>lg</sub> Distance | S-O <sub>nuc</sub> BO | S-O <sub>lg</sub> BO |
|-----------------|-----------------------------|----------------------------|-----------------------|----------------------|
| 0               | 2.31                        | 1.70                       | 0.2543                | 0.532                |
| 1               | 2.27                        | 1.70                       | 0.2498                | 0.5303               |
| 2               | 2.30                        | 1.70                       | 0.2412                | 0.5261               |
| 3               | 2.24                        | 1.71                       | 0.2279                | 0.5258               |
| 4               | 2.26                        | 1.71                       | 0.2234                | 0.5166               |
| 5               | 2.21                        | 1.73                       | 0.2332                | 0.5043               |
| 6               | 2.20                        | 1.73                       | 0.2373                | 0.5072               |
| 7               | 2.21                        | 1.72                       | 0.2368                | 0.5154               |
| 8               | 2.22                        | 1.72                       | 0.2432                | 0.5151               |

<sup>a</sup> Bond distances are shown in Å. Bond orders (BO) were calculated based on the Wiberg bond index<sup>7</sup> using natural bond orbital (NBO) analysis.<sup>8</sup>

**Table S18.** Geometries at the transition state for the alkaline hydrolysis of 4-nitrophenyl sulfate in the presence of 0 to 8 additional explicit water molecules, obtained using the M062X<sup>4</sup> functional.<sup>a</sup>

| Water Molecules | S-O <sub>nuc</sub> Distance | S-O <sub>lg</sub> Distance | S-O <sub>nuc</sub> BO | S-O <sub>lg</sub> BO |
|-----------------|-----------------------------|----------------------------|-----------------------|----------------------|
| 0               | 2.39                        | 1.69                       | 0.2306                | 0.5775               |
| 1               | 2.31                        | 1.69                       | 0.225                 | 0.582                |
| 2               | 2.35                        | 1.70                       | 0.2173                | 0.5692               |
| 3               | 2.29                        | 1.70                       | 0.2082                | 0.5734               |
| 4               | 2.31                        | 1.71                       | 0.2027                | 0.5577               |
| 5               | 2.26                        | 1.71                       | 0.2122                | 0.5495               |
| 6               | 2.25                        | 1.70                       | 0.2242                | 0.5785               |
| 7               | 2.24                        | 1.70                       | 0.2285                | 0.5885               |
| 8               | 2.26                        | 1.7                        | 0.2308                | 0.5915               |

<sup>a</sup> Bond distances are shown in Å. Bond orders (BO) were calculated based on the Wiberg bond index<sup>7</sup> using natural bond orbital (NBO) analysis.<sup>8</sup>

**Table S19.** Geometries at key stationary points for the alkaline hydrolysis of 4-nitrophenyl sulfate in the presence of 0 to 8 additional explicit water molecules, obtained using the  $\omega$ B97X-D<sup>3</sup> functional.<sup>a</sup>

| <b>0 waters</b> | <b>S-O<sub>nuc</sub> Distance</b> | <b>S-O<sub>lg</sub> Distance</b> | <b>S-O<sub>nuc</sub> BO</b> | <b>S-O<sub>lg</sub> BO</b> |
|-----------------|-----------------------------------|----------------------------------|-----------------------------|----------------------------|
| RS              | 3.87                              | 1.61                             | 0.0059                      | 0.6746                     |
| TS              | 2.35                              | 1.71                             | 0.2639                      | 0.5569                     |
| PS              | 1.59                              | 3.99                             | 0.7569                      | 0.0007                     |
| <b>1 water</b>  | <b>S-O<sub>nuc</sub> Distance</b> | <b>S-O<sub>lg</sub> Distance</b> | <b>S-O<sub>nuc</sub> BO</b> | <b>S-O<sub>lg</sub> BO</b> |
| RS              | 4.58                              | 1.61                             | 0.0017                      | 0.6882                     |
| TS              | 2.30                              | 1.71                             | 0.2515                      | 0.5641                     |
| PS              | 1.59                              | 3.98                             | 0.742                       | 0.0007                     |
| <b>2 waters</b> | <b>S-O<sub>nuc</sub> Distance</b> | <b>S-O<sub>lg</sub> Distance</b> | <b>S-O<sub>nuc</sub> BO</b> | <b>S-O<sub>lg</sub> BO</b> |
| RS              | 4.62                              | 1.61                             | 0.0013                      | 0.7122                     |
| TS              | 2.32                              | 1.72                             | 0.2456                      | 0.5485                     |
| PS              | 1.59                              | 4.72                             | 0.7438                      | 0.0002                     |
| <b>3 waters</b> | <b>S-O<sub>nuc</sub> Distance</b> | <b>S-O<sub>lg</sub> Distance</b> | <b>S-O<sub>nuc</sub> BO</b> | <b>S-O<sub>lg</sub> BO</b> |
| RS              | 4.49                              | 1.61                             | 0.0003                      | 0.7117                     |
| TS              | 2.27                              | 1.73                             | 0.2333                      | 0.5505                     |
| PS              | 1.56                              | 4.72                             | 0.8144                      | 0.0001                     |
| <b>4 waters</b> | <b>S-O<sub>nuc</sub> Distance</b> | <b>S-O<sub>lg</sub> Distance</b> | <b>S-O<sub>nuc</sub> BO</b> | <b>S-O<sub>lg</sub> BO</b> |
| RS              | 4.39                              | 1.61                             | 0.0003                      | 0.6907                     |
| TS              | 2.30                              | 1.73                             | 0.2242                      | 0.5336                     |
| PS              | 1.45                              | 1.59                             | 0.7446                      | 0.0008                     |
| <b>5 waters</b> | <b>S-O<sub>nuc</sub> Distance</b> | <b>S-O<sub>lg</sub> Distance</b> | <b>S-O<sub>nuc</sub> BO</b> | <b>S-O<sub>lg</sub> BO</b> |
| RS              | 4.35                              | 1.61                             | 0.0002                      | 0.7031                     |
| TS              | 2.23                              | 1.74                             | 0.2359                      | 0.5244                     |
| PS              | 1.48                              | 4.57                             | 1.1637                      | 0.0001                     |
| <b>6 waters</b> | <b>S-O<sub>nuc</sub> Distance</b> | <b>S-O<sub>lg</sub> Distance</b> | <b>S-O<sub>nuc</sub> BO</b> | <b>S-O<sub>lg</sub> BO</b> |
| RS              | 4.30                              | 1.61                             | 0.0002                      | 0.7175                     |
| TS              | 2.24                              | 1.74                             | 0.2399                      | 0.5334                     |
| PS              | 1.49                              | 4.76                             | 1.0107                      | 0.0002                     |
| <b>7 waters</b> | <b>S-O<sub>nuc</sub> Distance</b> | <b>S-O<sub>lg</sub> Distance</b> | <b>S-O<sub>nuc</sub> BO</b> | <b>S-O<sub>lg</sub> BO</b> |
| RS              | 3.95                              | 1.61                             | 0.001                       | 0.6984                     |
| TS              | 2.24                              | 1.73                             | 0.2458                      | 0.5488                     |
| PS              | 1.59                              | 3.92                             | 0.7508                      | 0.0017                     |



| <b>8 waters</b> | <b>S-O<sub>nuc</sub> Distance</b> | <b>S-O<sub>lg</sub> Distance</b> | <b>S-O<sub>nuc</sub> BO</b> | <b>S-O<sub>lg</sub> BO</b> |
|-----------------|-----------------------------------|----------------------------------|-----------------------------|----------------------------|
| RS              | 5.08                              | 1.60                             | 0.0004                      | 0.719                      |
| TS              | 2.26                              | 1.73                             | 0.2506                      | 0.5523                     |
| PS              | 1.48                              | 4.40                             | 1.0432                      | 0.0006                     |

<sup>a</sup> RS, TS and PS denote the reactant, transition and product states, respectively. Bond distances are shown in Å. Bond orders (BO) were calculated based on the Wiberg bond index<sup>7</sup> using natural bond orbital (NBO) analysis.<sup>8</sup>

**Table S20.** Geometries at key stationary points for the alkaline hydrolysis of 4-nitrophenyl sulfate in the presence of 0 to 8 additional explicit water molecules, obtained using the M11L<sup>1</sup> functional.<sup>a</sup>

| <b>0 waters</b> | <b>S-O<sub>nuc</sub> Distance</b> | <b>S-O<sub>lg</sub> Distance</b> | <b>S-O<sub>nuc</sub> BO</b> | <b>S-O<sub>lg</sub> BO</b> |
|-----------------|-----------------------------------|----------------------------------|-----------------------------|----------------------------|
| RS              | 3.79                              | 1.59                             | 0.0027                      | 0.6817                     |
| TS              | 2.31                              | 1.70                             | 0.2543                      | 0.532                      |
| PS              | 1.56                              | 4.09                             | 0.7523                      | 0.0012                     |
| <b>1 water</b>  | <b>S-O<sub>nuc</sub> Distance</b> | <b>S-O<sub>lg</sub> Distance</b> | <b>S-O<sub>nuc</sub> BO</b> | <b>S-O<sub>lg</sub> BO</b> |
| RS              | 3.78                              | 1.59                             | 0.0008                      | 0.6748                     |
| TS              | 2.27                              | 1.70                             | 0.2498                      | 0.5303                     |
| PS              | 1.56                              | 3.84                             | 0.7336                      | 0.0012                     |
| <b>2 waters</b> | <b>S-O<sub>nuc</sub> Distance</b> | <b>S-O<sub>lg</sub> Distance</b> | <b>S-O<sub>nuc</sub> BO</b> | <b>S-O<sub>lg</sub> BO</b> |
| RS              | 3.75                              | 1.59                             | 0.0047                      | 0.6768                     |
| TS              | 2.30                              | 1.70                             | 0.2412                      | 0.5261                     |
| PS              | 1.56                              | 3.82                             | 0.737                       | 0.0016                     |
| <b>3 waters</b> | <b>S-O<sub>nuc</sub> Distance</b> | <b>S-O<sub>lg</sub> Distance</b> | <b>S-O<sub>nuc</sub> BO</b> | <b>S-O<sub>lg</sub> BO</b> |
| RS              | 4.16                              | 1.59                             | 0.0005                      | 0.6929                     |
| TS              | 2.24                              | 1.71                             | 0.2279                      | 0.5258                     |
| PS              | 1.56                              | 3.83                             | 0.738                       | 0.0013                     |
| <b>4 waters</b> | <b>S-O<sub>nuc</sub> Distance</b> | <b>S-O<sub>lg</sub> Distance</b> | <b>S-O<sub>nuc</sub> BO</b> | <b>S-O<sub>lg</sub> BO</b> |
| RS              | 4.03                              | 1.59                             | 0.0005                      | 0.676                      |
| TS              | 2.26                              | 1.71                             | 0.2234                      | 0.5166                     |
| PS              | 1.56                              | 3.96                             | 0.7451                      | 0.0012                     |
| <b>5 waters</b> | <b>S-O<sub>nuc</sub> Distance</b> | <b>S-O<sub>lg</sub> Distance</b> | <b>S-O<sub>nuc</sub> BO</b> | <b>S-O<sub>lg</sub> BO</b> |
| RS              | 4.31                              | 1.58                             | 0.0009                      | 0.6844                     |
| TS              | 2.21                              | 1.73                             | 0.2332                      | 0.5043                     |
| PS              | 1.55                              | 3.94                             | 0.7662                      | 0.0011                     |
| <b>6 waters</b> | <b>S-O<sub>nuc</sub> Distance</b> | <b>S-O<sub>lg</sub> Distance</b> | <b>S-O<sub>nuc</sub> BO</b> | <b>S-O<sub>lg</sub> BO</b> |
| RS              | 4.29                              | 1.58                             | 0.0006                      | 0.6909                     |
| TS              | 2.20                              | 1.73                             | 0.2373                      | 0.5072                     |
| PS              | 1.45                              | 4.54                             | 1.069                       | 0.0002                     |
| <b>7 waters</b> | <b>S-O<sub>nuc</sub> Distance</b> | <b>S-O<sub>lg</sub> Distance</b> | <b>S-O<sub>nuc</sub> BO</b> | <b>S-O<sub>lg</sub> BO</b> |
| RS              | 4.53                              | 1.58                             | 0.0006                      | 0.6857                     |
| TS              | 2.21                              | 1.72                             | 0.2368                      | 0.5154                     |
| PS              | 1.46                              | 4.29                             | 1.0261                      | 0.0011                     |

| <b>8 waters</b> | <b>S-O<sub>nuc</sub> Distance</b> | <b>S-O<sub>lg</sub> Distance</b> | <b>S-O<sub>nuc</sub> BO</b> | <b>S-O<sub>lg</sub> BO</b> |
|-----------------|-----------------------------------|----------------------------------|-----------------------------|----------------------------|
| RS              | 5.81                              | 1.58                             | 0.0001                      | 0.6991                     |
| TS              | 2.22                              | 1.72                             | 0.2432                      | 0.5151                     |
| PS              | 1.46                              | 4.6                              | 0.9886                      | 0.0004                     |

<sup>a</sup> RS, TS and PS denote the reactant, transition and product states, respectively. Bond distances are shown in Å. Bond orders (BO) were calculated based on the Wiberg bond index<sup>7</sup> using natural bond orbital (NBO) analysis.<sup>8</sup>

**Table S21.** Geometries at key stationary points for the alkaline hydrolysis of 4-nitrophenyl sulfate in the presence of 0 to 8 additional explicit water molecules, obtained using the M062X<sup>4</sup> functional.<sup>a</sup>

| <b>0 waters</b> | <b>S-O<sub>nuc</sub> Distance</b> | <b>S-O<sub>lg</sub> Distance</b> | <b>S-O<sub>nuc</sub> BO</b> | <b>S-O<sub>lg</sub> BO</b> |
|-----------------|-----------------------------------|----------------------------------|-----------------------------|----------------------------|
| RS              | 3.53                              | 1.61                             | 0.0112                      | 0.6722                     |
| TS              | 2.39                              | 1.69                             | 0.2306                      | 0.5775                     |
| PS              | 1.59                              | 3.63                             | 0.7535                      | 0.0014                     |
| <b>1 water</b>  | <b>S-O<sub>nuc</sub> Distance</b> | <b>S-O<sub>lg</sub> Distance</b> | <b>S-O<sub>nuc</sub> BO</b> | <b>S-O<sub>lg</sub> BO</b> |
| RS              | 3.47                              | 1.61                             | 0.0103                      | 0.6764                     |
| TS              | 2.31                              | 1.69                             | 0.225                       | 0.582                      |
| PS              | 1.59                              | 3.73                             | 0.7316                      | 0.0013                     |
| <b>2 waters</b> | <b>S-O<sub>nuc</sub> Distance</b> | <b>S-O<sub>lg</sub> Distance</b> | <b>S-O<sub>nuc</sub> BO</b> | <b>S-O<sub>lg</sub> BO</b> |
| RS              | 3.52                              | 1.61                             | 0.0085                      | 0.6682                     |
| TS              | 2.35                              | 1.70                             | 0.2173                      | 0.5692                     |
| PS              | 1.59                              | 3.60                             | 0.7435                      | 0.0018                     |
| <b>3 waters</b> | <b>S-O<sub>nuc</sub> Distance</b> | <b>S-O<sub>lg</sub> Distance</b> | <b>S-O<sub>nuc</sub> BO</b> | <b>S-O<sub>lg</sub> BO</b> |
| RS              | 4.34                              | 1.61                             | 0.0009                      | 0.682                      |
| TS              | 2.29                              | 1.70                             | 0.2082                      | 0.5734                     |
| PS              | 1.59                              | 3.60                             | 0.7371                      | 0.0018                     |
| <b>4 waters</b> | <b>S-O<sub>nuc</sub> Distance</b> | <b>S-O<sub>lg</sub> Distance</b> | <b>S-O<sub>nuc</sub> BO</b> | <b>S-O<sub>lg</sub> BO</b> |
| RS              | 4.09                              | 1.61                             | 0.0005                      | 0.696                      |
| TS              | 2.31                              | 1.71                             | 0.2027                      | 0.5577                     |
| PS              | 1.59                              | 3.77                             | 0.7513                      | 0.0013                     |
| <b>5 waters</b> | <b>S-O<sub>nuc</sub> Distance</b> | <b>S-O<sub>lg</sub> Distance</b> | <b>S-O<sub>nuc</sub> BO</b> | <b>S-O<sub>lg</sub> BO</b> |
| RS              | 3.50                              | 1.61                             | 0.0014                      | 0.6616                     |
| TS              | 2.26                              | 1.71                             | 0.2122                      | 0.5495                     |
| PS              | 1.50                              | 4.57                             | 0.9411                      | 0.0002                     |
| <b>6 waters</b> | <b>S-O<sub>nuc</sub> Distance</b> | <b>S-O<sub>lg</sub> Distance</b> | <b>S-O<sub>nuc</sub> BO</b> | <b>S-O<sub>lg</sub> BO</b> |
| RS              | 3.40                              | 1.61                             | 0.0019                      | 0.6893                     |
| TS              | 2.25                              | 1.70                             | 0.2242                      | 0.5785                     |
| PS              | 1.58                              | 3.71                             | 0.7623                      | 0.0013                     |
| <b>7 waters</b> | <b>S-O<sub>nuc</sub> Distance</b> | <b>S-O<sub>lg</sub> Distance</b> | <b>S-O<sub>nuc</sub> BO</b> | <b>S-O<sub>lg</sub> BO</b> |
| RS              | 3.40                              | 1.61                             | 0.0016                      | 0.681                      |
| TS              | 2.24                              | 1.70                             | 0.2285                      | 0.5885                     |
| PS              | 1.48                              | 3.97                             | 1.1253                      | 0.0012                     |

| <b>8 waters</b> | <b>S-O<sub>nuc</sub> Distance</b> | <b>S-O<sub>lg</sub> Distance</b> | <b>S-O<sub>nuc</sub> BO</b> | <b>S-O<sub>lg</sub> BO</b> |
|-----------------|-----------------------------------|----------------------------------|-----------------------------|----------------------------|
| RS              | 3.16                              | 1.62                             | 0.004                       | 0.6855                     |
| TS              | 2.26                              | 1.7                              | 0.2308                      | 0.5915                     |
| PS              | 1.48                              | 3.99                             | 1.1272                      | 0.0013                     |

<sup>a</sup> RS, TS and PS denote the reactant, transition and product states, respectively. Bond distances are shown in Å. Bond orders (BO) were calculated based on the Wiberg bond index<sup>7</sup> using natural bond orbital (NBO) analysis.<sup>8</sup>

**Table S22.** Experimental and calculated rate constants for the alkaline hydrolysis of substituted sulfate diesters in the presence of 0 explicit water molecules (pure implicit solvation), obtained using the  $\omega$ B97X-D<sup>3</sup> functional.<sup>a</sup>

| <b>Substituent</b>    | <b><math>k_{\text{calc}}</math></b> | <b><math>\log k_{\text{calc}}</math></b> | <b><math>\log k_{\text{exp}}</math></b> |
|-----------------------|-------------------------------------|------------------------------------------|-----------------------------------------|
| 4-chloro-3-nitro      | $1.859 \times 10^2$                 | 2.2693                                   | -3.7799                                 |
| 4-nitro               | $1.090 \times 10^3$                 | 3.0374                                   | -3.9706                                 |
| 2,6-difluoro          | $5.439 \times 10^3$                 | 3.7355                                   | -3.8539                                 |
| 2-fluoro-4-nitro      | $3.943 \times 10^3$                 | 3.3958                                   | -2.9872                                 |
| 2,3,4,5,6-pentafluoro | $3.027 \times 10^5$                 | 5.4810                                   | -2.3872                                 |
| 3-fluoro-4-nitro      | $1.427 \times 10^4$                 | 4.1544                                   | -2.5114                                 |

<sup>a</sup> The calculated rate constant,  $k_{\text{calc}}$ , was derived from the calculated activation free energy,  $\Delta G^\ddagger$ , at 313.15 K, using transition state theory. The corresponding experimental value was obtained from ref. <sup>2</sup> after correcting the experimental second order rate constant by  $0.017 \text{ M}^{-1}$  to take into account the entropic cost of bringing the reacting fragments into the encounter complex, following ref. <sup>6</sup>.

**Table S23.** Experimental and calculated rate constants for the alkaline hydrolysis of substituted sulfate diesters in the presence of 2 explicit water molecules, obtained using the  $\omega$ B97X-D<sup>3</sup> functional.<sup>a</sup>

| Substituent           | $k_{\text{calc}}$   | $\log k_{\text{calc}}$ | $\log k_{\text{exp}}$ |
|-----------------------|---------------------|------------------------|-----------------------|
| 4-chloro-3-nitro      | $2.859 \times 10^3$ | 3.4562                 | -3.7799               |
| 4-nitro               | $3.339 \times 10^0$ | 0.5236                 | -3.9706               |
| 2,6-difluoro          | $3.536 \times 10^2$ | 2.5485                 | -3.8539               |
| 2-fluoro-4-nitro      | $1.676 \times 10^4$ | 4.2243                 | -2.9872               |
| 2,3,4,5,6-pentafluoro | $3.376 \times 10^6$ | 6.5284                 | -2.3872               |
| 3-fluoro-4-nitro      | $8.810 \times 10^3$ | 3.9450                 | -2.5114               |

<sup>a</sup> The calculated rate constant,  $k_{\text{calc}}$ , was derived from the calculated activation free energy,  $\Delta G^\ddagger$ , at 313.15 K, using transition state theory. The corresponding experimental value was obtained from ref. <sup>2</sup> after correcting the experimental second order rate constant by  $0.017 \text{ M}^{-1}$  to take into account the entropic cost of bringing the reacting fragments into the encounter complex, following ref. <sup>6</sup>.

**Table S24.** Experimental and calculated rate constants for the alkaline hydrolysis of substituted sulfate diesters in the presence of 4 explicit water molecules, obtained using the  $\omega$ B97X-D<sup>3</sup> functional.<sup>a</sup>

| Substituent           | $k_{\text{calc}}$   | $\log k_{\text{calc}}$ | $\log k_{\text{exp}}$ |
|-----------------------|---------------------|------------------------|-----------------------|
| 4-chloro-3-nitro      | $1.090 \times 10^3$ | 3.0374                 | -3.7799               |
| 4-nitro               | $5.728 \times 10^2$ | 2.7580                 | -3.9706               |
| 2,6-difluoro          | $1.968 \times 10^4$ | 4.2940                 | -3.8539               |
| 2-fluoro-4-nitro      | $4.397 \times 10^4$ | 4.6432                 | -2.9872               |
| 2,3,4,5,6-pentafluoro | $5.192 \times 10^7$ | 7.7153                 | -2.3872               |
| 3-fluoro-4-nitro      | $1.858 \times 10^2$ | 2.2690                 | -2.5114               |

<sup>a</sup> The calculated rate constant,  $k_{\text{calc}}$ , was derived from the calculated activation free energy,  $\Delta G^\ddagger$ , at 313.15 K, using transition state theory. The corresponding experimental value was obtained from ref. <sup>2</sup> after correcting the experimental second order rate constant by  $0.017 \text{ M}^{-1}$  to take into account the entropic cost of bringing the reacting fragments into the encounter complex, following ref. <sup>6</sup>.

**Table S25.** Experimental and calculated rate constants for the alkaline hydrolysis of substituted sulfate diesters in the presence of 8 explicit water molecules, obtained using the  $\omega$ B97X-D<sup>3</sup> functional.<sup>a</sup>

| Substituent           | $k_{\text{calc}}$      | $\log k_{\text{calc}}$ | $\log k_{\text{exp}}$ |
|-----------------------|------------------------|------------------------|-----------------------|
| 4-chloro-3-nitro      | $6.690 \times 10^{-1}$ | -0.1746                | -3.7799               |
| 4-nitro               | $3.922 \times 10^0$    | 0.5935                 | -3.9706               |
| 2,6-difluoro          | $9.718 \times 10^{-2}$ | -1.0124                | -3.8539               |
| 2-fluoro-4-nitro      | $1.029 \times 10^1$    | 1.0124                 | -2.9872               |
| 2,3,4,5,6-pentafluoro | $5.439 \times 10^3$    | 3.7355                 | -2.3872               |
| 3-fluoro-4-nitro      | $2.700 \times 10^1$    | 1.4313                 | -2.5114               |

<sup>a</sup> The calculated rate constant,  $k_{\text{calc}}$ , was derived from the calculated activation free energy,  $\Delta G^\ddagger$ , at 313.15 K, using transition state theory. The corresponding experimental value was obtained from ref. <sup>2</sup> after correcting the experimental second order rate constant by  $0.017 \text{ M}^{-1}$  to take into account the entropic cost of bringing the reacting fragments into the encounter complex, following ref. <sup>6</sup>.

**Table S26.** Experimental and calculated rate constants for the alkaline hydrolysis of substituted sulfate diesters in the presence of 0 explicit water molecules (pure implicit solvation), obtained using the M11L<sup>1</sup> functional.<sup>a</sup>

| Substituent           | $k_{\text{calc}}$   | $\log k_{\text{calc}}$ | $\log k_{\text{exp}}$ |
|-----------------------|---------------------|------------------------|-----------------------|
| 4-chloro-3-nitro      | $5.164 \times 10^4$ | 4.7130                 | -3.7799               |
| 4-nitro               | $2.311 \times 10^4$ | 4.3638                 | -3.9706               |
| 2,6-difluoro          | $4.175 \times 10^5$ | 5.6207                 | -3.8539               |
| 2-fluoro-4-nitro      | $1.511 \times 10^6$ | 6.1793                 | -2.9872               |
| 2,3,4,5,6-pentafluoro | $1.879 \times 10^8$ | 8.2739                 | -2.3872               |
| 3-fluoro-4-nitro      | $3.555 \times 10^5$ | 5.5508                 | -2.5114               |

<sup>a</sup> The calculated rate constant,  $k_{\text{calc}}$ , was derived from the calculated activation free energy,  $\Delta G^\ddagger$ , at 313.15 K, using transition state theory. The corresponding experimental value was obtained from ref. <sup>2</sup> after correcting the experimental second order rate constant by  $0.017 \text{ M}^{-1}$  to take into account the entropic cost of bringing the reacting fragments into the encounter complex, following ref. <sup>6</sup>.

**Table S27.** Experimental and calculated rate constants for the alkaline hydrolysis of substituted sulfate diesters in the presence of 2 explicit water molecules, obtained using the M11L<sup>1</sup> functional.<sup>a</sup>

| Substituent           | $k_{\text{calc}}$   | $\log k_{\text{calc}}$ | $\log k_{\text{exp}}$ |
|-----------------------|---------------------|------------------------|-----------------------|
| 4-chloro-3-nitro      | $1.215 \times 10^4$ | 4.0846                 | -3.7799               |
| 4-nitro               | $3.356 \times 10^3$ | 3.5258                 | -3.9706               |
| 2,6-difluoro          | $5.759 \times 10^5$ | 5.7603                 | -3.8539               |
| 2-fluoro-4-nitro      | $1.869 \times 10^5$ | 5.2716                 | -2.9872               |
| 2,3,4,5,6-pentafluoro | $1.435 \times 10^7$ | 7.1569                 | -2.3872               |
| 3-fluoro-4-nitro      | $4.175 \times 10^5$ | 5.6207                 | -2.5114               |

<sup>a</sup> The calculated rate constant,  $k_{\text{calc}}$ , was derived from the calculated activation free energy,  $\Delta G^\ddagger$ , at 313.15 K, using transition state theory. The corresponding experimental value was obtained from ref. <sup>2</sup> after correcting the experimental second order rate constant by  $0.017 \text{ M}^{-1}$  to take into account the entropic cost of bringing the reacting fragments into the encounter complex, following ref. <sup>6</sup>.

**Table S28.** Experimental and calculated rate constants for the alkaline hydrolysis of substituted sulfate diesters in the presence of 4 explicit water molecules, obtained using the M11L<sup>1</sup> functional.<sup>a</sup>

| Substituent           | $k_{\text{calc}}$   | $\log k_{\text{calc}}$ | $\log k_{\text{exp}}$ |
|-----------------------|---------------------|------------------------|-----------------------|
| 4-chloro-3-nitro      | $9.824 \times 10^4$ | 4.9923                 | -3.7799               |
| 4-nitro               | $2.578 \times 10^5$ | 5.4113                 | -3.9706               |
| 2,6-difluoro          | $8.365 \times 10^4$ | 4.9225                 | -3.8539               |
| 2-fluoro-4-nitro      | $5.468 \times 10^6$ | 6.7378                 | -2.9872               |
| 2,3,4,5,6-pentafluoro | $1.096 \times 10^6$ | 6.0399                 | -2.3872               |
| 3-fluoro-4-nitro      | $3.188 \times 10^4$ | 4.5035                 | -2.5114               |

<sup>a</sup> The calculated rate constant,  $k_{\text{calc}}$ , was derived from the calculated activation free energy,  $\Delta G^\ddagger$ , at 313.15 K, using transition state theory. The corresponding experimental value was obtained from ref. <sup>2</sup> after correcting the experimental second order rate constant by  $0.017 \text{ M}^{-1}$  to take into account the entropic cost of bringing the reacting fragments into the encounter complex, following ref. <sup>6</sup>.



**Table S29.** Experimental and calculated rate constants for the alkaline hydrolysis of substituted sulfate diesters in the presence of 8 explicit water molecules, obtained using the M11L<sup>1</sup> functional.<sup>a</sup>

| Substituent           | $k_{\text{calc}}$      | $\log k_{\text{calc}}$ | $\log k_{\text{exp}}$ |
|-----------------------|------------------------|------------------------|-----------------------|
| 4-chloro-3-nitro      | $2.550 \times 10^{-1}$ | -0.5935                | -3.7799               |
| 4-nitro               | $2.183 \times 10^2$    | 2.3391                 | -3.9706               |
| 2,6-difluoro          | $5.409 \times 10^0$    | 0.7331                 | -3.8539               |
| 2-fluoro-4-nitro      | $2.195 \times 10^5$    | 5.3414                 | -2.9872               |
| 2,3,4,5,6-pentafluoro | $1.503 \times 10^3$    | 3.1770                 | -2.3872               |
| 3-fluoro-4-nitro      | $3.943 \times 10^3$    | 3.5958                 | -2.5114               |

<sup>a</sup> The calculated rate constant,  $k_{\text{calc}}$ , was derived from the calculated activation free energy,  $\Delta G^\ddagger$ , at 313.15 K, using transition state theory. The corresponding experimental value was obtained from ref. <sup>2</sup> after correcting the experimental second order rate constant by  $0.017 \text{ M}^{-1}$  to take into account the entropic cost of bringing the reacting fragments into the encounter complex, following ref. <sup>6</sup>.

**Table S30.** Experimental and calculated rate constants for the alkaline hydrolysis of substituted sulfate diesters in the presence of 0 explicit water molecules (pure implicit solvent), obtained using the M062X<sup>4</sup> functional.<sup>a</sup>

| Substituent           | $k_{\text{calc}}$   | $\log k_{\text{calc}}$ | $\log k_{\text{exp}}$ |
|-----------------------|---------------------|------------------------|-----------------------|
| 4-chloro-3-nitro      | $4.904 \times 10^5$ | 5.6906                 | -3.7799               |
| 4-nitro               | $4.175 \times 10^5$ | 5.6207                 | -3.9706               |
| 2,6-difluoro          | $6.422 \times 10^6$ | 6.8078                 | -3.8539               |
| 2-fluoro-4-nitro      | $1.685 \times 10^7$ | 7.2266                 | -2.9872               |
| 2,3,4,5,6-pentafluoro | $3.044 \times 10^8$ | 8.4834                 | -2.3872               |
| 3-fluoro-4-nitro      | $9.328 \times 10^5$ | 5.9698                 | -2.5114               |

<sup>a</sup> The calculated rate constant,  $k_{\text{calc}}$ , was derived from the calculated activation free energy,  $\Delta G^\ddagger$ , at 313.15 K, using transition state theory. The corresponding experimental value was obtained from ref. <sup>2</sup> after correcting the experimental second order rate constant by  $0.017 \text{ M}^{-1}$  to take into account the entropic cost of bringing the reacting fragments into the encounter complex, following ref. <sup>6</sup>.

**Table S31.** Experimental and calculated rate constants for the alkaline hydrolysis of substituted sulfate diesters in the presence of 2 explicit water molecules, obtained using the M062X<sup>4</sup> functional.<sup>a</sup>

| Substituent           | $k_{\text{calc}}$   | $\log k_{\text{calc}}$ | $\log k_{\text{exp}}$ |
|-----------------------|---------------------|------------------------|-----------------------|
| 4-chloro-3-nitro      | $1.154 \times 10^5$ | 5.0622                 | -3.7799               |
| 4-nitro               | $1.869 \times 10^5$ | 5.2716                 | -3.9706               |
| 2,6-difluoro          | $1.435 \times 10^7$ | 7.1569                 | -3.8539               |
| 2-fluoro-4-nitro      | $4.421 \times 10^7$ | 7.6455                 | -2.9872               |
| 2,3,4,5,6-pentafluoro | $3.986 \times 10^9$ | 9.6005                 | -2.3872               |
| 3-fluoro-4-nitro      | $5.579 \times 10^5$ | 5.7466                 | -2.5114               |

<sup>a</sup> The calculated rate constant,  $k_{\text{calc}}$ , was derived from the calculated activation free energy,  $\Delta G^\ddagger$ , at 313.15 K, using transition state theory. The corresponding experimental value was obtained from ref. <sup>2</sup> after correcting the experimental second order rate constant by  $0.017 \text{ M}^{-1}$  to take into account the entropic cost of bringing the reacting fragments into the encounter complex, following ref. <sup>6</sup>.

**Table S32.** Experimental and calculated rate constants for the alkaline hydrolysis of substituted sulfate diesters in the presence of 4 explicit water molecules, obtained using the M062X<sup>4</sup> functional.<sup>a</sup>

| Substituent           | $k_{\text{calc}}$   | $\log k_{\text{calc}}$ | $\log k_{\text{exp}}$ |
|-----------------------|---------------------|------------------------|-----------------------|
| 4-chloro-3-nitro      | $2.592 \times 10^8$ | 8.4136                 | -3.7799               |
| 4-nitro               | $2.578 \times 10^5$ | 5.4112                 | -3.9706               |
| 2,6-difluoro          | $2.207 \times 10^8$ | 8.3438                 | -3.8539               |
| 2-fluoro-4-nitro      | $6.098 \times 10^7$ | 7.7852                 | -2.9872               |
| 2,3,4,5,6-pentafluoro | $2.890 \times 10^9$ | 9.4609                 | -2.3872               |
| 3-fluoro-4-nitro      | $7.162 \times 10^7$ | 7.8550                 | -2.5114               |

<sup>a</sup> The calculated rate constant,  $k_{\text{calc}}$ , was derived from the calculated activation free energy,  $\Delta G^\ddagger$ , at 313.15 K, using transition state theory. The corresponding experimental value was obtained from ref. <sup>2</sup> after correcting the experimental second order rate constant by  $0.017 \text{ M}^{-1}$  to take into account the entropic cost of bringing the reacting fragments into the encounter complex, following ref. <sup>6</sup>.

**Table S33.** Experimental and calculated rate constants for the alkaline hydrolysis of substituted sulfate diesters in the presence of 8 explicit water molecules, obtained using the M062X<sup>4</sup> functional.<sup>a</sup>

| Substituent           | $k_{\text{calc}}$   | $\log k_{\text{calc}}$ | $\log k_{\text{exp}}$ |
|-----------------------|---------------------|------------------------|-----------------------|
| 4-chloro-3-nitro      | $1.215 \times 10^4$ | 4.0846                 | -3.7799               |
| 4-nitro               | $2.448 \times 10^6$ | 6.3889                 | -3.9706               |
| 2,6-difluoro          | $5.759 \times 10^5$ | 5.7603                 | -3.8539               |
| 2-fluoro-4-nitro      | $8.858 \times 10^6$ | 6.9473                 | -2.9872               |
| 2,3,4,5,6-pentafluoro | $9.824 \times 10^4$ | 4.9923                 | -2.3872               |
| 3-fluoro-4-nitro      | $1.511 \times 10^6$ | 6.1793                 | -2.5114               |

<sup>a</sup> The calculated rate constant,  $k_{\text{calc}}$ , was derived from the calculated activation free energy,  $\Delta G^\ddagger$ , at 313.15 K, using transition state theory. The corresponding experimental value was obtained from ref. <sup>2</sup> after correcting the experimental second order rate constant by  $0.017 \text{ M}^{-1}$  to take into account the entropic cost of bringing the reacting fragments into the encounter complex, following ref. <sup>6</sup>.

**Table S34.** Energy decomposition of the calculated activation free energies ( $\Delta G^\ddagger_{\text{calc}}$ ) for the alkaline hydrolysis of substituted sulfate diesters in the presence of 0 explicit water molecules (pure implicit solvation), obtained using the  $\omega$ B97X-D<sup>3</sup> functional.<sup>a</sup>

| Substituent           | $\Delta E^\ddagger$ | $\Delta \text{ZPE}^\ddagger$ | $-\text{T}\Delta \text{S}^\ddagger$ | $\Delta G^\ddagger_{\text{calc}}$ | $\Delta G^\ddagger_{\text{exp}}$ | $\nu$     |
|-----------------------|---------------------|------------------------------|-------------------------------------|-----------------------------------|----------------------------------|-----------|
| 4-chloro-3-nitro      | 10.5                | 0.5                          | 4.1                                 | <b>15.1</b>                       | <b>21.2</b>                      | -285.8424 |
| 4-nitro               | 10.6                | 0.2                          | 3.2                                 | <b>14</b>                         | <b>21.5</b>                      | -269.6541 |
| 2,6-difluoro          | 8.2                 | 0.6                          | 4.2                                 | <b>13</b>                         | <b>21.3</b>                      | -255.3195 |
| 2-fluoro-4-nitro      | 9.2                 | 0.3                          | 3.7                                 | <b>13.2</b>                       | <b>20.1</b>                      | -269.6949 |
| 2,3,4,5,6-pentafluoro | 6                   | 0.4                          | 4.3                                 | <b>10.5</b>                       | <b>19.2</b>                      | -191.8671 |
| 3-fluoro-4-nitro      | 10                  | -0.04                        | 2.4                                 | <b>12.4</b>                       | <b>19.4</b>                      | -269.1173 |

<sup>a</sup> All energies are shown in  $\text{kcal mol}^{-1}$ , and vibrational frequencies are shown in  $\text{cm}^{-1}$ .  $\Delta E^\ddagger$ ,  $\Delta \text{ZPE}^\ddagger$  and  $-\text{T}\Delta \text{S}^\ddagger$  denote the contributions to  $\Delta G^\ddagger_{\text{calc}}$  from the electronic energy, zero-point energy and activation free energy, respectively.  $\nu$  denotes the first vibrational frequency.  $\Delta G^\ddagger_{\text{exp}}$  denotes the experimental activation free energy at 313.15 K, obtained from the kinetic data presented in ref. <sup>2</sup> using transition state theory.

**Table S35.** Energy decomposition of the calculated activation free energies ( $\Delta G^{\ddagger}_{\text{calc}}$ ) for the alkaline hydrolysis of substituted sulfate diesters in the presence of 2 explicit water molecules, obtained using the  $\omega$ B97X-D<sup>3</sup> functional.<sup>a</sup>

| Substituent           | $\Delta E^{\ddagger}$ | $\Delta ZPE^{\ddagger}$ | $-T\Delta S^{\ddagger}$ | $\Delta G^{\ddagger}_{\text{calc}}$ | $\Delta G^{\ddagger}_{\text{exp}}$ | $\nu$     |
|-----------------------|-----------------------|-------------------------|-------------------------|-------------------------------------|------------------------------------|-----------|
| 4-chloro-3-nitro      | 10.4                  | 0.2                     | 2.8                     | 13.4                                | 21.2                               | -275.4637 |
| 4-nitro               | 17.4                  | -0.4                    | 0.6                     | 17.6                                | 21.5                               | -289.4289 |
| 2,6-difluoro          | 7.8                   | 1.4                     | 5.5                     | 14.7                                | 21.3                               | -241.8208 |
| 2-fluoro-4-nitro      | 9.2                   | 0.4                     | 2.7                     | 12.3                                | 20.1                               | -280.3696 |
| 2,3,4,5,6-pentafluoro | 5                     | 0.7                     | 3.3                     | 9                                   | 19.2                               | -208.8696 |
| 3-fluoro-4-nitro      | 9.9                   | 0.2                     | 2.6                     | 12.7                                | 19.4                               | -283.2926 |

<sup>a</sup> All energies are shown in kcal mol<sup>-1</sup>, and vibrational frequencies are shown in cm<sup>-1</sup>.  $\Delta E^{\ddagger}$ ,  $\Delta ZPE^{\ddagger}$  and  $-T\Delta S^{\ddagger}$  denote the contributions to  $\Delta G^{\ddagger}_{\text{calc}}$  from the electronic energy, zero-point energy and activation free energy, respectively.  $\nu$  denotes the first vibrational frequency.  $\Delta G^{\ddagger}_{\text{exp}}$  denotes the experimental activation free energy at 313.15 K, obtained from the kinetic data presented in ref. <sup>2</sup> using transition state theory.

**Table S36.** Energy decomposition of the calculated activation free energies ( $\Delta G^{\ddagger}_{\text{calc}}$ ) for the alkaline hydrolysis of substituted sulfate diesters in the presence of 4 explicit water molecules, obtained using the  $\omega$ B97X-D<sup>3</sup> functional.<sup>a</sup>

| Substituent           | $\Delta E^{\ddagger}$ | $\Delta ZPE^{\ddagger}$ | $-T\Delta S^{\ddagger}$ | $\Delta G^{\ddagger}_{\text{calc}}$ | $\Delta G^{\ddagger}_{\text{exp}}$ | $\nu$     |
|-----------------------|-----------------------|-------------------------|-------------------------|-------------------------------------|------------------------------------|-----------|
| 4-chloro-3-nitro      | 11.8                  | 0.03                    | 2.2                     | 14                                  | 21.2                               | -256.1365 |
| 4-nitro               | 13.8                  | -0.3                    | 0.9                     | 14.4                                | 21.5                               | -266.4356 |
| 2,6-difluoro          | 6.1                   | 1.2                     | 4.9                     | 12.2                                | 21.3                               | -228.9236 |
| 2-fluoro-4-nitro      | 5.7                   | 1                       | 5                       | 11.7                                | 20.1                               | -225.2576 |
| 2,3,4,5,6-pentafluoro | 4.3                   | 0.4                     | 2.6                     | 7.3                                 | 19.2                               | -196.2121 |
| 3-fluoro-4-nitro      | 9.9                   | 1.1                     | 4.1                     | 15.1                                | 19.4                               | -271.425  |

<sup>a</sup> All energies are shown in kcal mol<sup>-1</sup>, and vibrational frequencies are shown in cm<sup>-1</sup>.  $\Delta E^{\ddagger}$ ,  $\Delta ZPE^{\ddagger}$  and  $-T\Delta S^{\ddagger}$  denote the contributions to  $\Delta G^{\ddagger}_{\text{calc}}$  from the electronic energy, zero-point energy and activation free energy, respectively.  $\nu$  denotes the first vibrational frequency.  $\Delta G^{\ddagger}_{\text{exp}}$  denotes the experimental activation free energy at 313.15 K, obtained from the kinetic data presented in ref. <sup>2</sup> using transition state theory.

**Table S37.** Energy decomposition of the calculated activation free energies ( $\Delta G^\ddagger_{\text{calc}}$ ) for the alkaline hydrolysis of substituted sulfate diesters in the presence of 8 explicit water molecules, obtained using the  $\omega$ B97X-D<sup>3</sup> functional.<sup>a</sup>

| Substituent           | $\Delta E^\ddagger$ | $\Delta ZPE^\ddagger$ | $-T\Delta S^\ddagger$ | $\Delta G^\ddagger_{\text{calc}}$ | $\Delta G^\ddagger_{\text{exp}}$ | $\nu$     |
|-----------------------|---------------------|-----------------------|-----------------------|-----------------------------------|----------------------------------|-----------|
| 4-chloro-3-nitro      | 24.7                | -1.9                  | -4.2                  | <b>18.6</b>                       | <b>21.2</b>                      | -274.1009 |
| 4-nitro               | 17.3                | -0.3                  | 0.5                   | <b>17.5</b>                       | <b>21.5</b>                      | -281.4245 |
| 2,6-difluoro          | 18.2                | 0.6                   | 1                     | <b>19.8</b>                       | <b>21.3</b>                      | -244.4031 |
| 2-fluoro-4-nitro      | 16.9                | -1.1                  | 0.1                   | <b>16.9</b>                       | <b>20.1</b>                      | -253.072  |
| 2,3,4,5,6-pentafluoro | 11.4                | 0.5                   | 1.1                   | <b>13</b>                         | <b>19.2</b>                      | -242.0959 |
| 3-fluoro-4-nitro      | 11.2                | 1.2                   | 3.9                   | <b>16.4</b>                       | <b>19.4</b>                      | -265.6762 |

<sup>a</sup> All energies are shown in kcal mol<sup>-1</sup>, and vibrational frequencies are shown in cm<sup>-1</sup>.  $\Delta E^\ddagger$ ,  $\Delta ZPE^\ddagger$  and  $-T\Delta S^\ddagger$  denote the contributions to  $\Delta G^\ddagger_{\text{calc}}$  from the electronic energy, zero-point energy and activation free energy, respectively.  $\nu$  denotes the first vibrational frequency.  $\Delta G^\ddagger_{\text{exp}}$  denotes the experimental activation free energy at 313.15 K, obtained from the kinetic data presented in ref. <sup>2</sup> using transition state theory.

**Table S38.** Energy decomposition of the calculated activation free energies ( $\Delta G^\ddagger_{\text{calc}}$ ) for the alkaline hydrolysis of substituted sulfate diesters in the presence of 0 explicit water molecules (pure implicit solvation), obtained using the M11L<sup>1</sup> functional.<sup>a</sup>

| Substituent           | $\Delta E^\ddagger$ | $\Delta ZPE^\ddagger$ | $-T\Delta S^\ddagger$ | $\Delta G^\ddagger_{\text{calc}}$ | $\Delta G^\ddagger_{\text{exp}}$ | $\nu$     |
|-----------------------|---------------------|-----------------------|-----------------------|-----------------------------------|----------------------------------|-----------|
| 4-chloro-3-nitro      | 9.1                 | -0.1                  | 2.6                   | <b>11.6</b>                       | <b>21.2</b>                      | -342.7198 |
| 4-nitro               | 9.1                 | -0.1                  | 3.1                   | <b>12.1</b>                       | <b>21.5</b>                      | -331.4516 |
| 2,6-difluoro          | 6.6                 | 0.2                   | 3.5                   | <b>10.3</b>                       | <b>21.3</b>                      | -268.0216 |
| 2-fluoro-4-nitro      | 7.8                 | -0.3                  | 2                     | <b>9.5</b>                        | <b>20.1</b>                      | -324.8034 |
| 2,3,4,5,6-pentafluoro | 3.6                 | 0.1                   | 2.8                   | <b>6.5</b>                        | <b>19.2</b>                      | -189.2089 |
| 3-fluoro-4-nitro      | 8.4                 | -0.3                  | 2.3                   | <b>10.4</b>                       | <b>19.4</b>                      | -319.3068 |

<sup>a</sup> All energies are shown in kcal mol<sup>-1</sup>, and vibrational frequencies are shown in cm<sup>-1</sup>.  $\Delta E^\ddagger$ ,  $\Delta ZPE^\ddagger$  and  $-T\Delta S^\ddagger$  denote the contributions to  $\Delta G^\ddagger_{\text{calc}}$  from the electronic energy, zero-point energy and activation free energy, respectively.  $\nu$  denotes the first vibrational frequency.  $\Delta G^\ddagger_{\text{exp}}$  denotes the experimental activation free energy at 313.15 K, obtained from the kinetic data presented in ref. <sup>2</sup> using transition state theory.

**Table S39.** Energy decomposition of the calculated activation free energies ( $\Delta G^{\ddagger}_{\text{calc}}$ ) for the alkaline hydrolysis of substituted sulfate diesters in the presence of 2 explicit water molecules, obtained using the M11L<sup>1</sup> functional.<sup>a</sup>

| Substituent           | $\Delta E^{\ddagger}$ | $\Delta ZPE^{\ddagger}$ | $-T\Delta S^{\ddagger}$ | $\Delta G^{\ddagger}_{\text{calc}}$ | $\Delta G^{\ddagger}_{\text{exp}}$ | $\nu$     |
|-----------------------|-----------------------|-------------------------|-------------------------|-------------------------------------|------------------------------------|-----------|
| 4-chloro-3-nitro      | 8.5                   | 0.5                     | 3.5                     | <b>12.5</b>                         | <b>21.2</b>                        | -323.5784 |
| 4-nitro               | 8.2                   | 0.01                    | 5.1                     | <b>13.3</b>                         | <b>21.5</b>                        | -332.1461 |
| 2,6-difluoro          | 6.6                   | 0.4                     | 3.1                     | <b>10.1</b>                         | <b>21.3</b>                        | -274.2715 |
| 2-fluoro-4-nitro      | 7.2                   | 0.2                     | 3.4                     | <b>10.8</b>                         | <b>20.1</b>                        | -310.5195 |
| 2,3,4,5,6-pentafluoro | 3.9                   | 0.3                     | 3.9                     | <b>8.1</b>                          | <b>19.2</b>                        | -226.258  |
| 3-fluoro-4-nitro      | 7.9                   | 0.3                     | 2.1                     | <b>10.3</b>                         | <b>19.4</b>                        | -319.1242 |

<sup>a</sup> All energies are shown in kcal mol<sup>-1</sup>, and vibrational frequencies are shown in cm<sup>-1</sup>.  $\Delta E^{\ddagger}$ ,  $\Delta ZPE^{\ddagger}$  and  $-T\Delta S^{\ddagger}$  denote the contributions to  $\Delta G^{\ddagger}_{\text{calc}}$  from the electronic energy, zero-point energy and activation free energy, respectively.  $\nu$  denotes the first vibrational frequency.  $\Delta G^{\ddagger}_{\text{exp}}$  denotes the experimental activation free energy at 313.15 K, obtained from the kinetic data presented in ref. <sup>2</sup> using transition state theory.

**Table S40.** Energy decomposition of the calculated activation free energies ( $\Delta G^{\ddagger}_{\text{calc}}$ ) for the alkaline hydrolysis of substituted sulfate diesters in the presence of 4 explicit water molecules, obtained using the M11L<sup>1</sup> functional.<sup>a</sup>

| Substituent           | $\Delta E^{\ddagger}$ | $\Delta ZPE^{\ddagger}$ | $-T\Delta S^{\ddagger}$ | $\Delta G^{\ddagger}_{\text{calc}}$ | $\Delta G^{\ddagger}_{\text{exp}}$ | $\nu$     |
|-----------------------|-----------------------|-------------------------|-------------------------|-------------------------------------|------------------------------------|-----------|
| 4-chloro-3-nitro      | 12.2                  | -0.9                    | -0.1                    | <b>11.2</b>                         | <b>21.2</b>                        | -318.2203 |
| 4-nitro               | 9                     | -0.2                    | 1.8                     | <b>10.6</b>                         | <b>21.5</b>                        | -332.1585 |
| 2,6-difluoro          | 9.4                   | 0.3                     | 1.6                     | <b>11.3</b>                         | <b>21.3</b>                        | -286.8493 |
| 2-fluoro-4-nitro      | 4.8                   | 0.6                     | 3.3                     | <b>8.7</b>                          | <b>20.1</b>                        | -270.3738 |
| 2,3,4,5,6-pentafluoro | 7.7                   | -0.05                   | 2.1                     | <b>9.7</b>                          | <b>19.2</b>                        | -241.5549 |
| 3-fluoro-4-nitro      | 7.3                   | 0.8                     | 3.8                     | <b>11.9</b>                         | <b>19.4</b>                        | -321.7632 |

<sup>a</sup> All energies are shown in kcal mol<sup>-1</sup>, and vibrational frequencies are shown in cm<sup>-1</sup>.  $\Delta E^{\ddagger}$ ,  $\Delta ZPE^{\ddagger}$  and  $-T\Delta S^{\ddagger}$  denote the contributions to  $\Delta G^{\ddagger}_{\text{calc}}$  from the electronic energy, zero-point energy and activation free energy, respectively.  $\nu$  denotes the first vibrational frequency.  $\Delta G^{\ddagger}_{\text{exp}}$  denotes the experimental activation free energy at 313.15 K, obtained from the kinetic data presented in ref. <sup>2</sup> using transition state theory.

**Table S41.** Energy decomposition of the calculated activation free energies ( $\Delta G^{\ddagger}_{\text{calc}}$ ) for the alkaline hydrolysis of substituted sulfate diesters in the presence of 8 explicit water molecules, obtained using the M11L<sup>1</sup> functional.<sup>a</sup>

| Substituent           | $\Delta E^{\ddagger}$ | $\Delta ZPE^{\ddagger}$ | $-T\Delta S^{\ddagger}$ | $\Delta G^{\ddagger}_{\text{calc}}$ | $\Delta G^{\ddagger}_{\text{exp}}$ | $\nu$     |
|-----------------------|-----------------------|-------------------------|-------------------------|-------------------------------------|------------------------------------|-----------|
| 4-chloro-3-nitro      | 18.8                  | -0.2                    | 0.6                     | <b>19.2</b>                         | <b>21.2</b>                        | -342.5189 |
| 4-nitro               | 19                    | -1.2                    | -2.8                    | <b>15</b>                           | <b>21.5</b>                        | -349.729  |
| 2,6-difluoro          | 18.2                  | 0.2                     | -1.1                    | <b>17.3</b>                         | <b>21.3</b>                        | -325.0493 |
| 2-fluoro-4-nitro      | 7.7                   | 0.8                     | 2.2                     | <b>10.7</b>                         | <b>20.1</b>                        | -322.0363 |
| 2,3,4,5,6-pentafluoro | 19.4                  | -2.3                    | -3.3                    | <b>13.8</b>                         | <b>19.2</b>                        | -317.5782 |
| 3-fluoro-4-nitro      | 14.8                  | -1.1                    | -0.5                    | <b>13.2</b>                         | <b>19.4</b>                        | -348.1176 |

<sup>a</sup> All energies are shown in kcal mol<sup>-1</sup>, and vibrational frequencies are shown in cm<sup>-1</sup>.  $\Delta E^{\ddagger}$ ,  $\Delta ZPE^{\ddagger}$  and  $-T\Delta S^{\ddagger}$  denote the contributions to  $\Delta G^{\ddagger}_{\text{calc}}$  from the electronic energy, zero-point energy and activation free energy, respectively.  $\nu$  denotes the first vibrational frequency.  $\Delta G^{\ddagger}_{\text{exp}}$  denotes the experimental activation free energy at 313.15 K, obtained from the kinetic data presented in ref. <sup>2</sup> using transition state theory.

**Table S42.** Energy decomposition of the calculated activation free energies ( $\Delta G^{\ddagger}_{\text{calc}}$ ) for the alkaline hydrolysis of substituted sulfate diesters in the presence of 0 explicit water molecules (pure implicit solvation), obtained using the M062X<sup>4</sup> functional.<sup>a</sup>

| Substituent           | $\Delta E^{\ddagger}$ | $\Delta ZPE^{\ddagger}$ | $-T\Delta S^{\ddagger}$ | $\Delta G^{\ddagger}_{\text{calc}}$ | $\Delta G^{\ddagger}_{\text{exp}}$ | $\nu$     |
|-----------------------|-----------------------|-------------------------|-------------------------|-------------------------------------|------------------------------------|-----------|
| 4-chloro-3-nitro      | 7                     | 0.2                     | 3                       | <b>10.2</b>                         | <b>21.2</b>                        | -302.0405 |
| 4-nitro               | 7.5                   | 0.1                     | 2.7                     | <b>10.3</b>                         | <b>21.5</b>                        | -316.6842 |
| 2,6-difluoro          | 4.3                   | 0.4                     | 3.9                     | <b>8.6</b>                          | <b>21.3</b>                        | -263.5941 |
| 2-fluoro-4-nitro      | 6.2                   | -0.2                    | 2                       | <b>8</b>                            | <b>20.1</b>                        | -303.4558 |
| 2,3,4,5,6-pentafluoro | 5                     | -0.1                    | 1.3                     | <b>6.2</b>                          | <b>19.2</b>                        | -259.2123 |
| 3-fluoro-4-nitro      | 6.9                   | 0.04                    | 2.9                     | <b>9.8</b>                          | <b>19.4</b>                        | -311.5082 |

<sup>a</sup> All energies are shown in kcal mol<sup>-1</sup>, and vibrational frequencies are shown in cm<sup>-1</sup>.  $\Delta E^{\ddagger}$ ,  $\Delta ZPE^{\ddagger}$  and  $-T\Delta S^{\ddagger}$  denote the contributions to  $\Delta G^{\ddagger}_{\text{calc}}$  from the electronic energy, zero-point energy and activation free energy, respectively.  $\nu$  denotes the first vibrational frequency.  $\Delta G^{\ddagger}_{\text{exp}}$  denotes the experimental activation free energy at 313.15 K, obtained from the kinetic data presented in ref. <sup>2</sup> using transition state theory.

**Table S43.** Energy decomposition of the calculated activation free energies ( $\Delta G^{\ddagger}_{\text{calc}}$ ) for the alkaline hydrolysis of substituted sulfate diesters in the presence of 2 explicit water molecules, obtained using the M062X<sup>4</sup> functional.<sup>a</sup>

| Substituent           | $\Delta E^{\ddagger}$ | $\Delta ZPE^{\ddagger}$ | $-T\Delta S^{\ddagger}$ | $\Delta G^{\ddagger}_{\text{calc}}$ | $\Delta G^{\ddagger}_{\text{exp}}$ | $\nu$     |
|-----------------------|-----------------------|-------------------------|-------------------------|-------------------------------------|------------------------------------|-----------|
| 4-chloro-3-nitro      | 6.8                   | 1.0                     | 3.3                     | <b>11.1</b>                         | <b>21.2</b>                        | -286.8049 |
| 4-nitro               | 6.3                   | 0.5                     | 4.0                     | <b>10.8</b>                         | <b>21.5</b>                        | -292.9074 |
| 2,6-difluoro          | 3.5                   | 0.8                     | 3.8                     | <b>8.1</b>                          | <b>21.3</b>                        | -263.6809 |
| 2-fluoro-4-nitro      | 6.4                   | 0.1                     | 0.9                     | <b>7.4</b>                          | <b>20.1</b>                        | -287.2524 |
| 2,3,4,5,6-pentafluoro | 7.4                   | 0.8                     | 2.1                     | <b>4.6</b>                          | <b>19.2</b>                        | -242.4723 |
| 3-fluoro-4-nitro      | 6.6                   | 0.6                     | 2.9                     | <b>10.1</b>                         | <b>19.4</b>                        | -285.2326 |

<sup>a</sup> All energies are shown in kcal mol<sup>-1</sup>, and vibrational frequencies are shown in cm<sup>-1</sup>.  $\Delta E^{\ddagger}$ ,  $\Delta ZPE^{\ddagger}$  and  $-T\Delta S^{\ddagger}$  denote the contributions to  $\Delta G^{\ddagger}_{\text{calc}}$  from the electronic energy, zero-point energy and activation free energy, respectively.  $\nu$  denotes the first vibrational frequency.  $\Delta G^{\ddagger}_{\text{exp}}$  denotes the experimental activation free energy at 313.15 K, obtained from the kinetic data presented in ref. <sup>2</sup> using transition state theory.

**Table S44.** Energy decomposition of the calculated activation free energies ( $\Delta G^{\ddagger}_{\text{calc}}$ ) for the alkaline hydrolysis of substituted sulfate in the presence of 4 explicit water molecules, obtained using the M062X<sup>4</sup> functional.<sup>a</sup>

| Substituent           | $\Delta E^{\ddagger}$ | $\Delta ZPE^{\ddagger}$ | $-T\Delta S^{\ddagger}$ | $\Delta G^{\ddagger}_{\text{calc}}$ | $\Delta G^{\ddagger}_{\text{exp}}$ | $\nu$     |
|-----------------------|-----------------------|-------------------------|-------------------------|-------------------------------------|------------------------------------|-----------|
| 4-chloro-3-nitro      | 9.0                   | -1.2                    | -1.5                    | <b>6.3</b>                          | <b>21.2</b>                        | -285.5131 |
| 4-nitro               | 11.0                  | -0.4                    | 0.01                    | <b>10.6</b>                         | <b>21.5</b>                        | -287.6699 |
| 2,6-difluoro          | 3.5                   | 0.7                     | 2.2                     | <b>6.4</b>                          | <b>21.3</b>                        | -254.0158 |
| 2-fluoro-4-nitro      | 3.3                   | 1.3                     | 2.7                     | <b>7.2</b>                          | <b>20.1</b>                        | -250.3784 |
| 2,3,4,5,6-pentafluoro | 1.8                   | 0.9                     | 2.1                     | <b>4.8</b>                          | <b>19.2</b>                        | -229.391  |
| 3-fluoro-4-nitro      | 6.4                   | 0.1                     | 0.6                     | <b>7.1</b>                          | <b>19.4</b>                        | -292.3245 |

<sup>a</sup> All energies are shown in kcal mol<sup>-1</sup>, and vibrational frequencies are shown in cm<sup>-1</sup>.  $\Delta E^{\ddagger}$ ,  $\Delta ZPE^{\ddagger}$  and  $-T\Delta S^{\ddagger}$  denote the contributions to  $\Delta G^{\ddagger}_{\text{calc}}$  from the electronic energy, zero-point energy and activation free energy, respectively.  $\nu$  denotes the first vibrational frequency.  $\Delta G^{\ddagger}_{\text{exp}}$  denotes the experimental activation free energy at 313.15 K, obtained from the kinetic data presented in ref. <sup>2</sup> using transition state theory.



**Table S45.** Energy decomposition of the calculated activation free energies ( $\Delta G^{\ddagger}_{\text{calc}}$ ) for the alkaline hydrolysis of substituted sulfate diesters in the presence of 8 explicit water molecules, obtained using the M062X<sup>4</sup> functional.<sup>a</sup>

| Substituent           | $\Delta E^{\ddagger}$ | $\Delta ZPE^{\ddagger}$ | $-T\Delta S^{\ddagger}$ | $\Delta G^{\ddagger}_{\text{calc}}$ | $\Delta G^{\ddagger}_{\text{exp}}$ | $\nu$     |
|-----------------------|-----------------------|-------------------------|-------------------------|-------------------------------------|------------------------------------|-----------|
| 4-chloro-3-nitro      | 10.8                  | 0.04                    | 1.7                     | <b>12.5</b>                         | <b>21.2</b>                        | -279.4276 |
| 4-nitro               | 8.2                   | 0.3                     | 0.7                     | <b>9.2</b>                          | <b>21.5</b>                        | -283.7645 |
| 2,6-difluoro          | 12.1                  | 0.1                     | -2.5                    | <b>10.1</b>                         | <b>21.3</b>                        | -266.2105 |
| 2-fluoro-4-nitro      | 6.3                   | 0.8                     | 1.3                     | <b>8.4</b>                          | <b>21.3</b>                        | -275.8933 |
| 2,3,4,5,6-pentafluoro | 5.6                   | 2.6                     | 3                       | <b>11.2</b>                         | <b>19.2</b>                        | -265.0677 |
| 3-fluoro-4-nitro      | 7.5                   | 0.5                     | 1.7                     | <b>9.5</b>                          | <b>19.4</b>                        | -275.3139 |

<sup>a</sup> All energies are shown in kcal mol<sup>-1</sup>, and vibrational frequencies are shown in cm<sup>-1</sup>.  $\Delta E^{\ddagger}$ ,  $\Delta ZPE^{\ddagger}$  and  $-T\Delta S^{\ddagger}$  denote the contributions to  $\Delta G^{\ddagger}_{\text{calc}}$  from the electronic energy, zero-point energy and activation free energy, respectively.  $\nu$  denotes the first vibrational frequency.  $\Delta G^{\ddagger}_{\text{exp}}$  denotes the experimental activation free energy at 313.15 K, obtained from the kinetic data presented in ref. <sup>2</sup> using transition state theory.

**Table S46.** Absolute and relative energy contributions to the calculated free energies ( $\Delta G_{\text{calc}}$ ) for the alkaline hydrolysis of substituted sulfate diesters in the presence of 0 additional explicit water molecules (pure implicit solvation), obtained using the  $\omega$ B97X-D<sup>3</sup> functional.<sup>a</sup>

| <b>4-chloro-3-nitro</b>      | <b>E</b>      | <b>ZPE</b> | <b>S</b> | <b><math>\Delta E</math></b> | <b><math>\Delta ZPE</math></b> | <b><math>-T\Delta S</math></b> | <b><math>\Delta G_{\text{calc}}</math></b> | <b><math>\nu</math></b> |
|------------------------------|---------------|------------|----------|------------------------------|--------------------------------|--------------------------------|--------------------------------------------|-------------------------|
| RS                           | -1902.3042145 | 129.07579  | 163.163  | 0.0                          | 0.0                            | 0.0                            | 0.0                                        | 17.0736                 |
| TS                           | -1902.2875000 | 129.59369  | 150.068  | 10.5                         | 0.5                            | 4.1                            | 15.1                                       | -285.8424               |
| PS                           | -1902.3512863 | 129.96548  | 153.386  | -29.5                        | 0.9                            | 3.1                            | -25.6                                      | -1.6775 <sup>b</sup>    |
| <b>4-nitro</b>               | <b>E</b>      | <b>ZPE</b> | <b>S</b> | <b><math>\Delta E</math></b> | <b><math>\Delta ZPE</math></b> | <b><math>-T\Delta S</math></b> | <b><math>\Delta G_{\text{calc}}</math></b> | <b><math>\nu</math></b> |
| RS                           | -1442.7105877 | 135.50586  | 153.837  | 0.0                          | 0.0                            | 0.0                            | 0.0                                        | 27.865                  |
| TS                           | -1442.6936351 | 135.68108  | 143.642  | 10.6                         | 0.2                            | 3.2                            | 14.0                                       | -269.6541               |
| PS                           | -1442.7620338 | 135.88209  | 156.698  | -32.3                        | 0.4                            | -0.9                           | -32.8                                      | 2.5343                  |
| <b>2,6-difluoro</b>          | <b>E</b>      | <b>ZPE</b> | <b>S</b> | <b><math>\Delta E</math></b> | <b><math>\Delta ZPE</math></b> | <b><math>-T\Delta S</math></b> | <b><math>\Delta G_{\text{calc}}</math></b> | <b><math>\nu</math></b> |
| RS                           | -1436.6836856 | 123.07560  | 152.237  | 0.0                          | 0.0                            | 0.0                            | 0.0                                        | 17.421                  |
| TS                           | -1436.6706435 | 123.64884  | 138.719  | 8.2                          | 0.6                            | 4.2                            | 13.0                                       | -255.3195               |
| PS                           | -1436.7285555 | 124.22134  | 147.713  | -28.2                        | 1.1                            | 1.4                            | -25.6                                      | 20.3575                 |
| <b>2-fluoro-4-nitro</b>      | <b>E</b>      | <b>ZPE</b> | <b>S</b> | <b><math>\Delta E</math></b> | <b><math>\Delta ZPE</math></b> | <b><math>-T\Delta S</math></b> | <b><math>\Delta G_{\text{calc}}</math></b> | <b><math>\nu</math></b> |
| RS                           | -1541.9430306 | 130.18239  | 159.802  | 0.0                          | 0.0                            | 0.0                            | 0.0                                        | 26.2503                 |
| TS                           | -1541.9283346 | 130.46140  | 147.827  | 9.2                          | 0.3                            | 3.7                            | 1.3                                        | -269.6949               |
| PS                           | -1541.9997668 | 130.96907  | 159.984  | -35.6                        | 0.8                            | 0.0                            | -34.8                                      | 11.2244                 |
| <b>2,3,4,5,6-pentafluoro</b> | <b>E</b>      | <b>ZPE</b> | <b>S</b> | <b><math>\Delta E</math></b> | <b><math>\Delta ZPE</math></b> | <b><math>-T\Delta S</math></b> | <b><math>\Delta G_{\text{calc}}</math></b> | <b><math>\nu</math></b> |
| RS                           | -1734.3655992 | 107.69555  | 166.047  | 0.0                          | 0.0                            | 0.0                            | 0.0                                        | 14.5274                 |
| TS                           | -1734.3560598 | 107.98307  | 152.786  | 6.0                          | 0.3                            | 4.2                            | 10.5                                       | -191.8671               |
| PS                           | -1734.4264982 | 108.46310  | 157.865  | -38.2                        | 0.8                            | 2.6                            | -34.9                                      | -7.6942 <sup>b</sup>    |
| <b>3-fluoro-4-nitro</b>      | <b>E</b>      | <b>ZPE</b> | <b>S</b> | <b><math>\Delta E</math></b> | <b><math>\Delta ZPE</math></b> | <b><math>-T\Delta S</math></b> | <b><math>\Delta G_{\text{calc}}</math></b> | <b><math>\nu</math></b> |
| RS                           | -1541.9399398 | 130.17666  | 158.212  | 0.0                          | 0.0                            | 0.0                            | 0.0                                        | 26.73270                |
| TS                           | -1541.9240006 | 130.13265  | 150.672  | 10.0                         | -0.04                          | 2.4                            | 12.4                                       | -269.1173               |
| PS                           | -1541.9948830 | 131.21003  | 157.313  | -34.5                        | 1.0                            | 0.3                            | -33.2                                      | 19.4349                 |

<sup>a</sup> RS, TS and PS denote the reactant, transition and product states, respectively. E, ZPE and S denote the absolute electronic energies, zero-point energies and entropies, and  $\Delta E$ ,  $\Delta ZPE$  and  $-T\Delta S$  denote the corresponding values relative to the RS (all values in kcal mol<sup>-1</sup>, except S which is presented in cal mol<sup>-1</sup> K<sup>-1</sup>).  $\nu$  denotes the first vibrational frequency (cm<sup>-1</sup>). <sup>b</sup> As this imaginary frequency is so small and it's in the product state (thus not affecting the calculated activation free energy for the hydrolysis of this compound), we have ignored it. We note that these structures were obtained using a super fine optimization grid.

**Table S47.** Absolute and relative energy contributions to the calculated free energies ( $\Delta G_{\text{calc}}$ ) for the alkaline hydrolysis of substituted sulfate diesters in the presence of 2 additional explicit water molecules, obtained using the  $\omega$ B97X-D<sup>3</sup> functional.<sup>a</sup>

| <b>4-chloro-3-nitro</b>      | <b>E</b>      | <b>ZPE</b> | <b>S</b> | <b><math>\Delta E</math></b> | <b><math>\Delta ZPE</math></b> | <b><math>-T\Delta S</math></b> | <b><math>\Delta G_{\text{calc}}</math></b> | <b><math>\nu</math></b> |
|------------------------------|---------------|------------|----------|------------------------------|--------------------------------|--------------------------------|--------------------------------------------|-------------------------|
| RS                           | -2055.2159043 | 159.50741  | 194.514  | 0.0                          | 0.0                            | 0.0                            | 0.0                                        | 14.4781                 |
| TS                           | -2055.1992769 | 159.68388  | 185.652  | 10.4                         | 0.2                            | 2.8                            | 13.4                                       | -275.4637               |
| PS                           | -2055.2621140 | 160.73052  | 189.1    | -29.0                        | 1.2                            | 1.7                            | -26.1                                      | 16.1674                 |
| <b>4-nitro</b>               | <b>E</b>      | <b>ZPE</b> | <b>S</b> | <b><math>\Delta E</math></b> | <b><math>\Delta ZPE</math></b> | <b><math>-T\Delta S</math></b> | <b><math>\Delta G_{\text{calc}}</math></b> | <b><math>\nu</math></b> |
| RS                           | -1595.6332193 | 166.11857  | 180.725  | 0.0                          | 0.0                            | 0.0                            | 0.0                                        | 22.0334                 |
| TS                           | -1595.6054962 | 165.73854  | 178.694  | 17.4                         | -0.4                           | 0.6                            | 17.6                                       | -289.4289               |
| PS                           | -1595.6744573 | 166.80655  | 181.284  | -25.9                        | 0.7                            | -0.2                           | -25.4                                      | 17.7028                 |
| <b>2,6-difluoro</b>          | <b>E</b>      | <b>ZPE</b> | <b>S</b> | <b><math>\Delta E</math></b> | <b><math>\Delta ZPE</math></b> | <b><math>-T\Delta S</math></b> | <b><math>\Delta G_{\text{calc}}</math></b> | <b><math>\nu</math></b> |
| RS                           | -1589.5941658 | 152.82038  | 186.29   | 0.0                          | 0.0                            | 0.0                            | 0.0                                        | 17.7358                 |
| TS                           | -1589.5818073 | 154.26010  | 168.853  | 7.8                          | 1.4                            | 5.5                            | 14.7                                       | -241.8208               |
| PS                           | -1589.6434680 | 155.32919  | 174.728  | -30.9                        | 2.5                            | 3.6                            | -24.8                                      | 13.9686                 |
| <b>2-fluoro-4-nitro</b>      | <b>E</b>      | <b>ZPE</b> | <b>S</b> | <b><math>\Delta E</math></b> | <b><math>\Delta ZPE</math></b> | <b><math>-T\Delta S</math></b> | <b><math>\Delta G_{\text{calc}}</math></b> | <b><math>\nu</math></b> |
| RS                           | -1694.8547048 | 159.94999  | 193.151  | 0.0                          | 0.0                            | 0.0                            | 0.0                                        | 19.3376                 |
| TS                           | -1694.8400412 | 160.39707  | 184.485  | 9.2                          | 0.4                            | 2.7                            | 12.3                                       | -280.3696               |
| PS                           | -1694.9138037 | 161.26591  | 188.452  | -37.1                        | 1.3                            | 1.5                            | -34.3                                      | 13.2216                 |
| <b>2,3,4,5,6-pentafluoro</b> | <b>E</b>      | <b>ZPE</b> | <b>S</b> | <b><math>\Delta E</math></b> | <b><math>\Delta ZPE</math></b> | <b><math>-T\Delta S</math></b> | <b><math>\Delta G_{\text{calc}}</math></b> | <b><math>\nu</math></b> |
| RS                           | -1887.2747775 | 137.54657  | 197.269  | 0.0                          | 0.0                            | 0.0                            | 0.0                                        | 19.1679                 |
| TS                           | -1887.2668689 | 138.25343  | 186.78   | 5.0                          | 0.7                            | 3.3                            | 9.0                                        | -208.8696               |
| PS                           | -1887.3365707 | 139.75578  | 189.2    | -38.8                        | 2.2                            | 2.5                            | -34.0                                      | 12.0491                 |
| <b>3-fluoro-4-nitro</b>      | <b>E</b>      | <b>ZPE</b> | <b>S</b> | <b><math>\Delta E</math></b> | <b><math>\Delta ZPE</math></b> | <b><math>-T\Delta S</math></b> | <b><math>\Delta G_{\text{calc}}</math></b> | <b><math>\nu</math></b> |
| RS                           | -1694.8517863 | 159.98096  | 193.219  | 0.0                          | 0.0                            | 0.0                            | 0.0                                        | 16.7567                 |
| TS                           | -1694.8359636 | 160.17970  | 184.801  | 9.9                          | 0.2                            | 2.6                            | 12.7                                       | -283.2926               |
| PS                           | -1694.9069808 | 161.36655  | 186.269  | -34.6                        | 1.4                            | 2.2                            | -31.1                                      | 18.7284                 |

<sup>a</sup> RS, TS and PS denote the reactant, transition and product states, respectively. E, ZPE and S denote the absolute electronic energies, zero-point energies and entropies, and  $\Delta E$ ,  $\Delta ZPE$  and  $-T\Delta S$  denote the corresponding values relative to the RS (all values in kcal mol<sup>-1</sup>, except S which is presented in cal mol<sup>-1</sup> K<sup>-1</sup>).  $\nu$  denotes the first vibrational frequency (cm<sup>-1</sup>).

**Table S48.** Absolute and relative energy contributions to the calculated free energies ( $\Delta G_{\text{calc}}$ ) for the alkaline hydrolysis of substituted sulfate diesters in the presence of 4 additional explicit water molecules, obtained using the  $\omega$ B97X-D<sup>3</sup> functional.<sup>a</sup>

| <b>4-chloro-3-nitro</b>      | <b>E</b>      | <b>ZPE</b> | <b>S</b> | <b><math>\Delta E</math></b> | <b><math>\Delta ZPE</math></b> | <b><math>-T\Delta S</math></b> | <b><math>\Delta G_{\text{calc}}</math></b> | <b><math>\nu</math></b> |
|------------------------------|---------------|------------|----------|------------------------------|--------------------------------|--------------------------------|--------------------------------------------|-------------------------|
| RS                           | -2208.1289185 | 189.89797  | 225.274  | 0.0                          | 0.0                            | 0.0                            | 0.0                                        | 11.3064                 |
| TS                           | -2208.1100991 | 189.93258  | 218.261  | 11.8                         | 0.03                           | 2.2                            | 14.0                                       | -256.1365               |
| PS                           | -2208.1842302 | 191.43654  | 213.383  | -34.7                        | 1.5                            | 3.7                            | -29.4                                      | 15.1949                 |
| <b>4-nitro</b>               | <b>E</b>      | <b>ZPE</b> | <b>S</b> | <b><math>\Delta E</math></b> | <b><math>\Delta ZPE</math></b> | <b><math>-T\Delta S</math></b> | <b><math>\Delta G_{\text{calc}}</math></b> | <b><math>\nu</math></b> |
| RS                           | -1748.5825985 | 197.83378  | 209.165  | -28.4                        | 1.7                            | 2.4                            | -24.3                                      | 20.5039                 |
| TS                           | -1748.5825985 | 197.83378  | 209.165  | -28.4                        | 1.7                            | 2.4                            | -24.3                                      | 20.5039                 |
| PS                           | -1748.5825985 | 197.83378  | 209.165  | -28.4                        | 1.7                            | 2.4                            | -24.3                                      | 20.5039                 |
| <b>2,6-difluoro</b>          | <b>E</b>      | <b>ZPE</b> | <b>S</b> | <b><math>\Delta E</math></b> | <b><math>\Delta ZPE</math></b> | <b><math>-T\Delta S</math></b> | <b><math>\Delta G_{\text{calc}}</math></b> | <b><math>\nu</math></b> |
| RS                           | -1742.5069474 | 184.45982  | 209.868  | 0.0                          | 0.0                            | 0.0                            | 0.0                                        | 18.3166                 |
| TS                           | -1742.4971831 | 185.65766  | 194.29   | 6.1                          | 1.2                            | 4.9                            | 12.2                                       | -228.9236               |
| PS                           | -1742.5663798 | 186.22158  | 196.878  | -37.3                        | 1.8                            | 4.1                            | -31.5                                      | 23.2154                 |
| <b>2-fluoro-4-nitro</b>      | <b>E</b>      | <b>ZPE</b> | <b>S</b> | <b><math>\Delta E</math></b> | <b><math>\Delta ZPE</math></b> | <b><math>-T\Delta S</math></b> | <b><math>\Delta G_{\text{calc}}</math></b> | <b><math>\nu</math></b> |
| RS                           | -1847.7652977 | 191.03741  | 223.554  | 0.0                          | 0.0                            | 0.0                            | 0.0                                        | 8.2604                  |
| TS                           | -1847.7561367 | 192.00850  | 207.574  | 5.7                          | 1.0                            | 5.0                            | 11.7                                       | -225.2576               |
| PS                           | -1847.8319125 | 192.73182  | 210.003  | -41.8                        | 1.7                            | 4.2                            | -35.9                                      | 24.0498                 |
| <b>2,3,4,5,6-pentafluoro</b> | <b>E</b>      | <b>ZPE</b> | <b>S</b> | <b><math>\Delta E</math></b> | <b><math>\Delta ZPE</math></b> | <b><math>-T\Delta S</math></b> | <b><math>\Delta G_{\text{calc}}</math></b> | <b><math>\nu</math></b> |
| RS                           | -2040.1873760 | 168.63691  | 226.542  | 0.0                          | 0.0                            | 0.0                            | 0.0                                        | 15.6112                 |
| TS                           | -2040.1804955 | 169.01223  | 218.176  | 4.3                          | 0.4                            | 2.6                            | 7.3                                        | -196.2121               |
| PS                           | -2040.2527854 | 169.89541  | 226.09   | -41.0                        | 1.3                            | 0.1                            | -39.6                                      | 13.8064                 |
| <b>3-fluoro-4-nitro</b>      | <b>E</b>      | <b>ZPE</b> | <b>S</b> | <b><math>\Delta E</math></b> | <b><math>\Delta ZPE</math></b> | <b><math>-T\Delta S</math></b> | <b><math>\Delta G_{\text{calc}}</math></b> | <b><math>\nu</math></b> |
| RS                           | -1847.7643492 | 190.76985  | 223.165  | 0.0                          | 0.0                            | 0.0                            | 0.0                                        | 14.25260                |
| TS                           | -1847.7485130 | 191.90362  | 210.141  | 9.9                          | 1.1                            | 4.1                            | 15.1                                       | -271.425                |
| PS                           | -1847.8427036 | 194.82563  | 201.175  | -49.2                        | 4.1                            | 6.9                            | -38.2                                      | 19.6845                 |

<sup>a</sup> RS, TS and PS denote the reactant, transition and product states, respectively. E, ZPE and S denote the absolute electronic energies, zero-point energies and entropies, and  $\Delta E$ ,  $\Delta ZPE$  and  $-T\Delta S$  denote the corresponding values relative to the RS (all values in kcal mol<sup>-1</sup>, except S which is presented in cal mol<sup>-1</sup> K<sup>-1</sup>).  $\nu$  denotes the first vibrational frequency (cm<sup>-1</sup>).

**Table S49.** Absolute and relative energy contributions to the calculated free energies ( $\Delta G_{\text{calc}}$ ) for the alkaline hydrolysis of substituted sulfate diesters in the presence of 8 additional explicit water molecules, obtained using the  $\omega$ B97X-D<sup>3</sup> functional.<sup>a</sup>

| <b>4-chloro-3-nitro</b>      | <b>E</b>      | <b>ZPE</b> | <b>S</b> | <b><math>\Delta E</math></b> | <b><math>\Delta ZPE</math></b> | <b><math>-T\Delta S</math></b> | <b><math>\Delta G_{\text{calc}}</math></b> | <b><math>\nu</math></b> |
|------------------------------|---------------|------------|----------|------------------------------|--------------------------------|--------------------------------|--------------------------------------------|-------------------------|
| RS                           | -2513.9649011 | 255.10002  | 257.71   | 0.0                          | 0.0                            | 0.0                            | 0.0                                        | 16.4417                 |
| TS                           | -2513.9254724 | 253.17055  | 271.131  | 24.7                         | -1.9                           | -4.2                           | 18.6                                       | -274.1009               |
| PS                           | -2513.9892573 | 256.05744  | 268.033  | -15.3                        | 1.0                            | -3.2                           | -17.6                                      | 9.5019                  |
| <b>4-nitro</b>               | <b>E</b>      | <b>ZPE</b> | <b>S</b> | <b><math>\Delta E</math></b> | <b><math>\Delta ZPE</math></b> | <b><math>-T\Delta S</math></b> | <b><math>\Delta G_{\text{calc}}</math></b> | <b><math>\nu</math></b> |
| RS                           | -2054.3572856 | 259.26468  | 268.855  | 0.0                          | 0.0                            | 0.0                            | 0.0                                        | 21.8354                 |
| TS                           | -2054.3298017 | 259.00254  | 267.27   | 17.2                         | -0.3                           | 0.5                            | 17.5                                       | -281.4245               |
| PS                           | -2054.4203233 | 262.31221  | 258.444  | -39.6                        | 3.0                            | 3.3                            | -33.2                                      | 20.8432                 |
| <b>2,6-difluoro</b>          | <b>E</b>      | <b>ZPE</b> | <b>S</b> | <b><math>\Delta E</math></b> | <b><math>\Delta ZPE</math></b> | <b><math>-T\Delta S</math></b> | <b><math>\Delta G_{\text{calc}}</math></b> | <b><math>\nu</math></b> |
| RS                           | -2048.3334825 | 247.61469  | 258.819  | 0.0                          | 0.0                            | 0.0                            | 0.0                                        | 10.0192                 |
| TS                           | -2048.3044759 | 248.23546  | 255.612  | 18.2                         | 0.6                            | 1.0                            | 19.8                                       | -244.4031               |
| PS                           | -2048.3669334 | 250.31496  | 252.422  | -21.0                        | 2.7                            | 2.0                            | -16.3                                      | 19.5536                 |
| <b>2-fluoro-4-nitro</b>      | <b>E</b>      | <b>ZPE</b> | <b>S</b> | <b><math>\Delta E</math></b> | <b><math>\Delta ZPE</math></b> | <b><math>-T\Delta S</math></b> | <b><math>\Delta G_{\text{calc}}</math></b> | <b><math>\nu</math></b> |
| RS                           | -2153.5990449 | 256.42344  | 260.295  | 0.0                          | 0.0                            | 0.0                            | 0.0                                        | 15.4432                 |
| TS                           | -2153.5721200 | 255.36330  | 259.948  | 16.9                         | -1.1                           | 0.1                            | 15.9                                       | -253.072                |
| PS                           | -2153.6296227 | 254.21948  | 281.277  | -19.2                        | -2.2                           | -6.6                           | -28.0                                      | 16.2566                 |
| <b>2,3,4,5,6-pentafluoro</b> | <b>E</b>      | <b>ZPE</b> | <b>S</b> | <b><math>\Delta E</math></b> | <b><math>\Delta ZPE</math></b> | <b><math>-T\Delta S</math></b> | <b><math>\Delta G_{\text{calc}}</math></b> | <b><math>\nu</math></b> |
| RS                           | -2346.0082839 | 231.51664  | 278.407  | 0.0                          | 0.0                            | 0.0                            | 0.0                                        | 16.7679                 |
| TS                           | -2345.9901827 | 232.00887  | 274.755  | 11.4                         | 0.5                            | 1.1                            | 13.0                                       | -242.0959               |
| PS                           | -2346.1026374 | 235.97442  | 256.471  | -59.2                        | 4.5                            | 6.9                            | -47.9                                      | 13.8433                 |
| <b>3-fluoro-4-nitro</b>      | <b>E</b>      | <b>ZPE</b> | <b>S</b> | <b><math>\Delta E</math></b> | <b><math>\Delta ZPE</math></b> | <b><math>-T\Delta S</math></b> | <b><math>\Delta G_{\text{calc}}</math></b> | <b><math>\nu</math></b> |
| RS                           | -2153.5865409 | 253.94880  | 273.6    | 0.0                          | 0.0                            | 0.0                            | 0.0                                        | 12.69340                |
| TS                           | -2153.5686364 | 255.18823  | 261.041  | 11.2                         | 1.2                            | 3.9                            | 16.4                                       | -265.6762               |
| PS                           | -2153.6561573 | 257.96841  | 258.529  | -43.7                        | 4.0                            | 4.7                            | -34.9                                      | 14.2619                 |

<sup>a</sup> RS, TS and PS denote the reactant, transition and product states, respectively. E, ZPE and S denote the absolute electronic energies, zero-point energies and entropies, and  $\Delta E$ ,  $\Delta ZPE$  and  $-T\Delta S$  denote the corresponding values relative to the RS (all values in kcal mol<sup>-1</sup>, except S which is presented in cal mol<sup>-1</sup> K<sup>-1</sup>).  $\nu$  denotes the first vibrational frequency (cm<sup>-1</sup>).

**Table S50.** Absolute and relative energy contributions to the calculated free energies ( $\Delta G_{\text{calc}}$ ) for the alkaline hydrolysis of substituted sulfate diesters in the presence of 0 additional explicit water molecules (pure implicit solvation), obtained using the M11L<sup>1</sup> functional.<sup>a</sup>

| <b>4-chloro-3-nitro</b>      | <b>E</b>      | <b>ZPE</b> | <b>S</b> | <b><math>\Delta E</math></b> | <b><math>\Delta ZPE</math></b> | <b><math>-T\Delta S</math></b> | <b><math>\Delta G_{\text{calc}}</math></b> | <b><math>\nu</math></b> |
|------------------------------|---------------|------------|----------|------------------------------|--------------------------------|--------------------------------|--------------------------------------------|-------------------------|
| RS                           | -1902.3578193 | 126.83627  | 158.971  | 0.0                          | 0.0                            | 0.0                            | 0.0                                        | 27.8721                 |
| TS                           | -1902.3433531 | 126.70291  | 150.819  | 9.1                          | -0.1                           | 2.6                            | 11.6                                       | -342.7198               |
| PS                           | -1902.4121718 | 127.26183  | 160.952  | -34.1                        | 0.4                            | -0.6                           | -34.3                                      | 15.1231                 |
| <b>4-nitro</b>               | <b>E</b>      | <b>ZPE</b> | <b>S</b> | <b><math>\Delta E</math></b> | <b><math>\Delta ZPE</math></b> | <b><math>-T\Delta S</math></b> | <b><math>\Delta G_{\text{calc}}</math></b> | <b><math>\nu</math></b> |
| RS                           | -1442.7758730 | 132.60756  | 153.934  | 0.0                          | 0.0                            | 0.0                            | 0.0                                        | 26.0193                 |
| TS                           | -1442.7614408 | 132.52363  | 144.06   | 9.1                          | -0.1                           | 3.1                            | 12.1                                       | -331.4516               |
| PS                           | -1442.8369596 | 133.54658  | 154.348  | -38.3                        | 0.9                            | -0.1                           | -37.5                                      | 20.0531                 |
| <b>2,6-difluoro</b>          | <b>E</b>      | <b>ZPE</b> | <b>S</b> | <b><math>\Delta E</math></b> | <b><math>\Delta ZPE</math></b> | <b><math>-T\Delta S</math></b> | <b><math>\Delta G_{\text{calc}}</math></b> | <b><math>\nu</math></b> |
| RS                           | -1436.7306633 | 120.90060  | 149.583  | 0.0                          | 0.0                            | 0.0                            | 0.0                                        | 21.9297                 |
| TS                           | -1436.7201611 | 121.10522  | 138.459  | 6.6                          | 0.2                            | 3.5                            | 10.3                                       | -268.0216               |
| PS                           | -1436.7804009 | 121.64097  | 148.945  | -31.2                        | 0.7                            | 0.2                            | -30.3                                      | 22.6591                 |
| <b>2-fluoro-4-nitro</b>      | <b>E</b>      | <b>ZPE</b> | <b>S</b> | <b><math>\Delta E</math></b> | <b><math>\Delta ZPE</math></b> | <b><math>-T\Delta S</math></b> | <b><math>\Delta G_{\text{calc}}</math></b> | <b><math>\nu</math></b> |
| RS                           | -1542.0000347 | 127.89485  | 156.893  | 0.0                          | 0.0                            | 0.0                            | 0.0                                        | 27.3537                 |
| TS                           | -1541.9875827 | 127.56909  | 150.364  | 7.8                          | -0.3                           | 2.0                            | 9.5                                        | -324.8034               |
| PS                           | -1542.0698566 | 128.61707  | 156.149  | -43.8                        | 0.7                            | 0.2                            | -42.9                                      | 25.387                  |
| <b>2,3,4,5,6-pentafluoro</b> | <b>E</b>      | <b>ZPE</b> | <b>S</b> | <b><math>\Delta E</math></b> | <b><math>\Delta ZPE</math></b> | <b><math>-T\Delta S</math></b> | <b><math>\Delta G_{\text{calc}}</math></b> | <b><math>\nu</math></b> |
| RS                           | -1734.3856029 | 106.40281  | 160.883  | 0.0                          | 0.0                            | 0.0                            | 0.0                                        | 20.0889                 |
| TS                           | -1734.3798443 | 106.49258  | 152.094  | 3.6                          | 0.1                            | 2.8                            | 6.5                                        | -189.2089               |
| PS                           | -1734.4467195 | 107.06774  | 164.707  | -38.4                        | 0.7                            | -1.2                           | -38.9                                      | 5.4584                  |
| <b>3-fluoro-4-nitro</b>      | <b>E</b>      | <b>ZPE</b> | <b>S</b> | <b><math>\Delta E</math></b> | <b><math>\Delta ZPE</math></b> | <b><math>-T\Delta S</math></b> | <b><math>\Delta G_{\text{calc}}</math></b> | <b><math>\nu</math></b> |
| RS                           | -1541.9975490 | 127.66277  | 159.563  | 0.0                          | 0.0                            | 0.0                            | 0.0                                        | 21.6879                 |
| TS                           | -1541.9842218 | 127.31597  | 152.27   | 8.4                          | -0.3                           | 2.3                            | 10.4                                       | -319.3068               |
| PS                           | -1542.0661308 | 128.68973  | 155.292  | -43.0                        | 1.0                            | 1.3                            | -40.7                                      | 20.5933                 |

<sup>a</sup> RS, TS and PS denote the reactant, transition and product states, respectively. E, ZPE and S denote the absolute electronic energies, zero-point energies and entropies, and  $\Delta E$ ,  $\Delta ZPE$  and  $-T\Delta S$  denote the corresponding values relative to the RS (all values in kcal mol<sup>-1</sup>, except S which is presented in cal mol<sup>-1</sup> K<sup>-1</sup>).  $\nu$  denotes the first vibrational frequency (cm<sup>-1</sup>).

**Table S51.** Absolute and relative energy contributions to the calculated free energies ( $\Delta G_{\text{calc}}$ ) for the alkaline hydrolysis of substituted sulfate diesters in the presence of 2 additional explicit water molecules, obtained using the M11L<sup>1</sup> functional.<sup>a</sup>

| <b>4-chloro-3-nitro</b>      | <b>E</b>      | <b>ZPE</b> | <b>S</b> | <b><math>\Delta E</math></b> | <b><math>\Delta ZPE</math></b> | <b><math>-T\Delta S</math></b> | <b><math>\Delta G_{\text{calc}}</math></b> | <b><math>\nu</math></b> |
|------------------------------|---------------|------------|----------|------------------------------|--------------------------------|--------------------------------|--------------------------------------------|-------------------------|
| RS                           | -2055.2620499 | 156.67046  | 197.705  | 0.0                          | 0.0                            | 0.0                            | 0.0                                        | 22.4306                 |
| TS                           | -2055.2484667 | 157.17314  | 186.581  | 8.5                          | 0.5                            | 3.5                            | 12.5                                       | -323.5784               |
| PS                           | -2055.3134990 | 157.84919  | 198      | -32.3                        | 1.2                            | -0.1                           | -31.2                                      | 13.3636                 |
| <b>4-nitro</b>               | <b>E</b>      | <b>ZPE</b> | <b>S</b> | <b><math>\Delta E</math></b> | <b><math>\Delta ZPE</math></b> | <b><math>-T\Delta S</math></b> | <b><math>\Delta G_{\text{calc}}</math></b> | <b><math>\nu</math></b> |
| RS                           | -1595.6796661 | 162.80622  | 192.494  | 0.0                          | 0.0                            | 0.0                            | 0.0                                        | 17.8855                 |
| TS                           | -1595.6665795 | 162.81241  | 176.348  | 8.2                          | 0.01                           | 5.1                            | 13.3                                       | -332.1461               |
| PS                           | -1595.7381136 | 163.80171  | 189.695  | -36.7                        | 1.0                            | 0.9                            | -34.8                                      | 16.8895                 |
| <b>2,6-difluoro</b>          | <b>E</b>      | <b>ZPE</b> | <b>S</b> | <b><math>\Delta E</math></b> | <b><math>\Delta ZPE</math></b> | <b><math>-T\Delta S</math></b> | <b><math>\Delta G_{\text{calc}}</math></b> | <b><math>\nu</math></b> |
| RS                           | -1589.6353623 | 151.08293  | 184.634  | 0.0                          | 0.0                            | 0.0                            | 0.0                                        | 19.8214                 |
| TS                           | -1589.6248656 | 151.50084  | 174.591  | 6.6                          | 0.4                            | 3.1                            | 10.1                                       | -274.2715               |
| PS                           | -1589.6818927 | 152.30770  | 183.626  | -29.2                        | 1.2                            | 0.3                            | -27.7                                      | 21.3463                 |
| <b>2-fluoro-4-nitro</b>      | <b>E</b>      | <b>ZPE</b> | <b>S</b> | <b><math>\Delta E</math></b> | <b><math>\Delta ZPE</math></b> | <b><math>-T\Delta S</math></b> | <b><math>\Delta G_{\text{calc}}</math></b> | <b><math>\nu</math></b> |
| RS                           | -1694.9037957 | 157.64879  | 197.713  | 0.0                          | 0.0                            | 0.0                            | 0.0                                        | 16.6447                 |
| TS                           | -1694.8923934 | 157.89537  | 186.996  | 7.2                          | 0.2                            | 3.4                            | 10.8                                       | -310.5195               |
| PS                           | -1694.9696190 | 158.80770  | 194.94   | -41.3                        | 1.2                            | 0.9                            | -39.3                                      | 13.9617                 |
| <b>2,3,4,5,6-pentafluoro</b> | <b>E</b>      | <b>ZPE</b> | <b>S</b> | <b><math>\Delta E</math></b> | <b><math>\Delta ZPE</math></b> | <b><math>-T\Delta S</math></b> | <b><math>\Delta G_{\text{calc}}</math></b> | <b><math>\nu</math></b> |
| RS                           | -1887.2905617 | 136.20351  | 202.435  | 0.0                          | 0.0                            | 0.0                            | 0.0                                        | 20.6642                 |
| TS                           | -1887.2843890 | 136.52097  | 190.066  | 3.9                          | 0.3                            | 3.9                            | 8.1                                        | -226.258                |
| PS                           | -1887.3557432 | 138.58635  | 190.688  | -40.9                        | 2.4                            | 3.7                            | -34.8                                      | 15.1247                 |
| <b>3-fluoro-4-nitro</b>      | <b>E</b>      | <b>ZPE</b> | <b>S</b> | <b><math>\Delta E</math></b> | <b><math>\Delta ZPE</math></b> | <b><math>-T\Delta S</math></b> | <b><math>\Delta G_{\text{calc}}</math></b> | <b><math>\nu</math></b> |
| RS                           | -1694.9020537 | 157.81168  | 193.711  | 0.0                          | 0.0                            | 0.0                            | 0.0                                        | 22.6421                 |
| TS                           | -1694.8893891 | 158.09203  | 186.94   | 7.9                          | 0.3                            | 2.1                            | 10.3                                       | -319.1242               |
| PS                           | -1694.9639396 | 158.83893  | 193.659  | -38.8                        | 1.0                            | 0.0                            | -37.8                                      | 18.7402                 |

<sup>a</sup> RS, TS and PS denote the reactant, transition and product states, respectively. E, ZPE and S denote the absolute electronic energies, zero-point energies and entropies, and  $\Delta E$ ,  $\Delta ZPE$  and  $-T\Delta S$  denote the corresponding values relative to the RS (all values in kcal mol<sup>-1</sup>, except S which is presented in cal mol<sup>-1</sup> K<sup>-1</sup>).  $\nu$  denotes the first vibrational frequency (cm<sup>-1</sup>).

**Table S52.** Absolute and relative energy contributions to the calculated free energies ( $\Delta G_{\text{calc}}$ ) for the alkaline hydrolysis of substituted sulfate diesters in the presence of 4 additional explicit water molecules, obtained using the M11L<sup>1</sup> functional.<sup>a</sup>

| <b>4-chloro-3-nitro</b>      | <b>E</b>      | <b>ZPE</b> | <b>S</b> | <b><math>\Delta E</math></b> | <b><math>\Delta ZPE</math></b> | <b><math>-T\Delta S</math></b> | <b><math>\Delta G_{\text{calc}}</math></b> | <b><math>\nu</math></b> |
|------------------------------|---------------|------------|----------|------------------------------|--------------------------------|--------------------------------|--------------------------------------------|-------------------------|
| RS                           | -2208.1731695 | 188.51369  | 220.321  | 0.0                          | 0.0                            | 0.0                            | 0.0                                        | 19.1392                 |
| TS                           | -2208.1537816 | 187.62340  | 220.625  | 12.2                         | -0.9                           | -0.1                           | 11.2                                       | -318.2203               |
| PS                           | -2208.2230609 | 189.34747  | 222.784  | -31.3                        | 0.8                            | -0.8                           | -31.2                                      | 15.7009                 |
| <b>4-nitro</b>               | <b>E</b>      | <b>ZPE</b> | <b>S</b> | <b><math>\Delta E</math></b> | <b><math>\Delta ZPE</math></b> | <b><math>-T\Delta S</math></b> | <b><math>\Delta G_{\text{calc}}</math></b> | <b><math>\nu</math></b> |
| RS                           | -1748.5846590 | 193.92064  | 221.836  | 0.0                          | 0.0                            | 0.0                            | 0.0                                        | 18.1209                 |
| TS                           | -1748.5702951 | 193.69953  | 215.956  | 9.0                          | -0.2                           | 1.8                            | 10.6                                       | -332.1585               |
| PS                           | -1748.6433847 | 194.01429  | 226.487  | -36.9                        | 0.1                            | -1.5                           | -38.2                                      | 13.0271                 |
| <b>2,6-difluoro</b>          | <b>E</b>      | <b>ZPE</b> | <b>S</b> | <b><math>\Delta E</math></b> | <b><math>\Delta ZPE</math></b> | <b><math>-T\Delta S</math></b> | <b><math>\Delta G_{\text{calc}}</math></b> | <b><math>\nu</math></b> |
| RS                           | -1742.4098809 | 184.17449  | 201.372  | 0.0                          | 0.0                            | 0.0                            | 0.0                                        | 23.1067                 |
| TS                           | -1742.4002826 | 184.73336  | 195.444  | 6.0                          | 0.6                            | 1.9                            | 8.5                                        | -254.0158               |
| PS                           | -1742.4378561 | 184.81254  | 208.664  | -17.6                        | 0.6                            | -2.3                           | -19.2                                      | 14.5464                 |
| <b>2-fluoro-4-nitro</b>      | <b>E</b>      | <b>ZPE</b> | <b>S</b> | <b><math>\Delta E</math></b> | <b><math>\Delta ZPE</math></b> | <b><math>-T\Delta S</math></b> | <b><math>\Delta G_{\text{calc}}</math></b> | <b><math>\nu</math></b> |
| RS                           | -1847.8123900 | 189.36537  | 220.815  | 0.0                          | 0.0                            | 0.0                            | 0.0                                        | 18.7224                 |
| TS                           | -1847.8046853 | 190.00686  | 210.408  | 4.8                          | 0.6                            | 3.3                            | 8.7                                        | -270.3738               |
| PS                           | -1847.8813220 | 190.75027  | 218.078  | -43.3                        | 1.4                            | 0.9                            | -41.0                                      | 18.0807                 |
| <b>2,3,4,5,6-pentafluoro</b> | <b>E</b>      | <b>ZPE</b> | <b>S</b> | <b><math>\Delta E</math></b> | <b><math>\Delta ZPE</math></b> | <b><math>-T\Delta S</math></b> | <b><math>\Delta G_{\text{calc}}</math></b> | <b><math>\nu</math></b> |
| RS                           | -2040.2035249 | 168.10969  | 225.341  | 0.0                          | 0.0                            | 0.0                            | 0.0                                        | 11.7815                 |
| TS                           | -2040.1912314 | 168.05982  | 218.789  | 7.7                          | -0.05                          | 2.1                            | 9.7                                        | -241.5549               |
| PS                           | -2040.2709492 | 169.72211  | 215.335  | -42.3                        | 1.6                            | 3.1                            | -37.6                                      | 14.9447                 |
| <b>3-fluoro-4-nitro</b>      | <b>E</b>      | <b>ZPE</b> | <b>S</b> | <b><math>\Delta E</math></b> | <b><math>\Delta ZPE</math></b> | <b><math>-T\Delta S</math></b> | <b><math>\Delta G_{\text{calc}}</math></b> | <b><math>\nu</math></b> |
| RS                           | -1847.808703  | 188.71113  | 227.776  | 0.0                          | 0.0                            | 0.0                            | 0.0                                        | 11.5219                 |
| TS                           | -1847.7970222 | 189.54466  | 215.567  | 7.3                          | 0.8                            | 3.8                            | 11.9                                       | -321.7632               |
| PS                           | -1847.8733499 | 190.83091  | 215.823  | -40.6                        | 2.1                            | 3.7                            | -34.7                                      | 24.913                  |

<sup>a</sup> RS, TS and PS denote the reactant, transition and product states, respectively. E, ZPE and S denote the absolute electronic energies, zero-point energies and entropies, and  $\Delta E$ ,  $\Delta ZPE$  and  $-T\Delta S$  denote the corresponding values relative to the RS (all values in kcal mol<sup>-1</sup>, except S which is presented in cal mol<sup>-1</sup> K<sup>-1</sup>).  $\nu$  denotes the first vibrational frequency (cm<sup>-1</sup>).



**Table S53.** Absolute and relative energy contributions to the calculated free energies ( $\Delta G_{\text{calc}}$ ) for the alkaline hydrolysis of substituted sulfate diesters in the presence of 8 additional explicit water molecules, obtained using the M11L<sup>1</sup> functional.<sup>a</sup>

| <b>4-chloro-3-nitro</b>      | <b>E</b>      | <b>ZPE</b> | <b>S</b> | <b><math>\Delta E</math></b> | <b><math>\Delta ZPE</math></b> | <b><math>-T\Delta S</math></b> | <b><math>\Delta G_{\text{calc}}</math></b> | <b><math>\nu</math></b> |
|------------------------------|---------------|------------|----------|------------------------------|--------------------------------|--------------------------------|--------------------------------------------|-------------------------|
| RS                           | -2513.9880841 | 253.18732  | 263.722  | 0.0                          | 0.0                            | 0.0                            | 0.0                                        | 21.2262                 |
| TS                           | -2513.9582942 | 252.10255  | 272.726  | 18.7                         | -1.1                           | -2.8                           | 19.2                                       | -342.5189               |
| PS                           | -2514.0591272 | 256.97688  | 258.78   | -44.6                        | -1.6                           | 1.5                            | -44.7                                      | 13.7788                 |
| <b>4-nitro</b>               | <b>E</b>      | <b>ZPE</b> | <b>S</b> | <b><math>\Delta E</math></b> | <b><math>\Delta ZPE</math></b> | <b><math>-T\Delta S</math></b> | <b><math>\Delta G_{\text{calc}}</math></b> | <b><math>\nu</math></b> |
| RS                           | -2054.4041216 | 257.57639  | 270.968  | 0.0                          | 0.0                            | 0.0                            | 0.0                                        | 16.7626                 |
| TS                           | -2054.3737914 | 256.36054  | 279.803  | 19.0                         | -1.2                           | -2.8                           | 15.0                                       | -349.729                |
| PS                           | -2054.4710658 | 260.06720  | 267.761  | -42.0                        | 2.5                            | 1.0                            | -38.5                                      | 12.8992                 |
| <b>2,6-difluoro</b>          | <b>E</b>      | <b>ZPE</b> | <b>S</b> | <b><math>\Delta E</math></b> | <b><math>\Delta ZPE</math></b> | <b><math>-T\Delta S</math></b> | <b><math>\Delta G_{\text{calc}}</math></b> | <b><math>\nu</math></b> |
| RS                           | -2048.3575885 | 246.02196  | 264.398  | 0.0                          | 0.0                            | 0.0                            | 0.0                                        | 17.7056                 |
| TS                           | -2048.3289186 | 245.82629  | 268.283  | 18.0                         | -0.2                           | -1.2                           | 17.3                                       | -325.0493               |
| PS                           | -2048.3935449 | 247.00953  | 269.499  | -22.6                        | 1.0                            | -1.6                           | -23.2                                      | 12.141                  |
| <b>2-fluoro-4-nitro</b>      | <b>E</b>      | <b>ZPE</b> | <b>S</b> | <b><math>\Delta E</math></b> | <b><math>\Delta ZPE</math></b> | <b><math>-T\Delta S</math></b> | <b><math>\Delta G_{\text{calc}}</math></b> | <b><math>\nu</math></b> |
| RS                           | -2153.6223468 | 252.61400  | 273.807  | 0.0                          | 0.0                            | 0.0                            | 0.0                                        | 20.7761                 |
| TS                           | -2153.6100237 | 253.37812  | 266.733  | 7.7                          | 0.8                            | 2.2                            | 10.7                                       | -322.0363               |
| PS                           | -2153.6845054 | 255.03453  | 271.99   | -39.0                        | 2.4                            | 0.6                            | -36.0                                      | 6.3165                  |
| <b>2,3,4,5,6-pentafluoro</b> | <b>E</b>      | <b>ZPE</b> | <b>S</b> | <b><math>\Delta E</math></b> | <b><math>\Delta ZPE</math></b> | <b><math>-T\Delta S</math></b> | <b><math>\Delta G_{\text{calc}}</math></b> | <b><math>\nu</math></b> |
| RS                           | -2346.0206453 | 233.05359  | 270.252  | 0.0                          | 0.0                            | 0.0                            | 0.0                                        | 12.3535                 |
| TS                           | -2345.9896939 | 230.71353  | 280.841  | 19.4                         | -2.3                           | -3.3                           | 13.8                                       | -317.5782               |
| PS                           | -2346.0625396 | 232.67986  | 281.569  | -26.3                        | -0.4                           | -3.5                           | -30.2                                      | 15.7874                 |
| <b>3-fluoro-4-nitro</b>      | <b>E</b>      | <b>ZPE</b> | <b>S</b> | <b><math>\Delta E</math></b> | <b><math>\Delta ZPE</math></b> | <b><math>-T\Delta S</math></b> | <b><math>\Delta G_{\text{calc}}</math></b> | <b><math>\nu</math></b> |
| RS                           | -2153.6300518 | 253.95391  | 271.178  | 0.0                          | 0.0                            | 0.0                            | 0.0                                        | 14.0848                 |
| TS                           | -2153.6064029 | 252.85472  | 272.923  | 14.8                         | -1.1                           | -0.5                           | 13.2                                       | -348.1176               |
| PS                           | -2153.6926118 | 255.45433  | 269.709  | -39.3                        | 1.5                            | 0.5                            | -37.3                                      | 14.0572                 |

<sup>a</sup> RS, TS and PS denote the reactant, transition and product states, respectively. E, ZPE and S denote the absolute electronic energies, zero-point energies and entropies, and  $\Delta E$ ,  $\Delta ZPE$  and  $-T\Delta S$  denote the corresponding values relative to the RS (all values in kcal mol<sup>-1</sup>, except S which is presented in cal mol<sup>-1</sup> K<sup>-1</sup>).  $\nu$  denotes the first vibrational frequency (cm<sup>-1</sup>).

**Table S54.** Absolute and relative energy contributions to the calculated free energies ( $\Delta G_{\text{calc}}$ ) for the alkaline hydrolysis of substituted sulfate diesters in the presence of 0 additional explicit water molecules (pure implicit solvation), obtained using the M062X<sup>4</sup> functional.<sup>a</sup>

| <b>4-chloro-3-nitro</b>      | <b>E</b>      | <b>ZPE</b> | <b>S</b> | <b><math>\Delta E</math></b> | <b><math>\Delta ZPE</math></b> | <b><math>-T\Delta S</math></b> | <b><math>\Delta G_{\text{calc}}</math></b> | <b><math>\nu</math></b> |
|------------------------------|---------------|------------|----------|------------------------------|--------------------------------|--------------------------------|--------------------------------------------|-------------------------|
| RS                           | -1902.2303188 | 129.47170  | 158.174  | 0.0                          | 0.0                            | 0.0                            | 0.0                                        | 24.8632                 |
| TS                           | -1902.2191858 | 129.66221  | 148.557  | 7.0                          | 0.2                            | 3.0                            | 10.2                                       | -302.0405               |
| PS                           | -1902.2763628 | 129.97825  | 158.163  | -28.9                        | 0.5                            | 0.0                            | -28.4                                      | 21.8115                 |
| <b>4-nitro</b>               | <b>E</b>      | <b>ZPE</b> | <b>S</b> | <b><math>\Delta E</math></b> | <b><math>\Delta ZPE</math></b> | <b><math>-T\Delta S</math></b> | <b><math>\Delta G_{\text{calc}}</math></b> | <b><math>\nu</math></b> |
| RS                           | -1442.6434689 | 135.59843  | 151.311  | 0.0                          | 0.0                            | 0.0                            | 0.0                                        | 29.8035                 |
| TS                           | -1442.6315931 | 135.71633  | 142.807  | 7.5                          | 0.1                            | 2.7                            | 10.3                                       | -316.6842               |
| PS                           | -1442.6973623 | 136.14742  | 147.904  | -33.8                        | 0.5                            | 1.1                            | -32.2                                      | 30.4802                 |
| <b>2,6-difluoro</b>          | <b>E</b>      | <b>ZPE</b> | <b>S</b> | <b><math>\Delta E</math></b> | <b><math>\Delta ZPE</math></b> | <b><math>-T\Delta S</math></b> | <b><math>\Delta G_{\text{calc}}</math></b> | <b><math>\nu</math></b> |
| RS                           | -1436.6228870 | 123.25751  | 150.624  | 0.0                          | 0.0                            | 0.0                            | 0.0                                        | 16.7084                 |
| TS                           | -1436.6159961 | 123.66497  | 138.298  | 4.3                          | 0.4                            | 3.9                            | 8.6                                        | -263.5941               |
| PS                           | -1436.6695536 | 124.32118  | 143.773  | -29.3                        | 1.1                            | 2.1                            | -26.1                                      | 29.8583                 |
| <b>2-fluoro-4-nitro</b>      | <b>E</b>      | <b>ZPE</b> | <b>S</b> | <b><math>\Delta E</math></b> | <b><math>\Delta ZPE</math></b> | <b><math>-T\Delta S</math></b> | <b><math>\Delta G_{\text{calc}}</math></b> | <b><math>\nu</math></b> |
| RS                           | -1541.8755269 | 130.54571  | 154.853  | 0.0                          | 0.0                            | 0.0                            | 0.0                                        | 26.5774                 |
| TS                           | -1541.8657148 | 130.37507  | 148.341  | 6.2                          | -0.2                           | 2.0                            | 8.0                                        | -303.4558               |
| PS                           | -1541.9376867 | 130.77852  | 155.359  | -39.0                        | 0.2                            | -0.2                           | -38.9                                      | 15.2376                 |
| <b>2,3,4,5,6-pentafluoro</b> | <b>E</b>      | <b>ZPE</b> | <b>S</b> | <b><math>\Delta E</math></b> | <b><math>\Delta ZPE</math></b> | <b><math>-T\Delta S</math></b> | <b><math>\Delta G_{\text{calc}}</math></b> | <b><math>\nu</math></b> |
| RS                           | -1734.3035296 | 108.33934  | 158.701  | 0.0                          | 0.0                            | 0.0                            | 0.0                                        | 25.7602                 |
| TS                           | -1734.2955291 | 108.21717  | 154.41   | 5.0                          | -0.1                           | 1.3                            | 6.2                                        | -259.2123               |
| PS                           | -1734.3648894 | 109.06680  | 158.021  | -38.5                        | 0.7                            | 0.2                            | -37.6                                      | 19.671                  |
| <b>3-fluoro-4-nitro</b>      | <b>E</b>      | <b>ZPE</b> | <b>S</b> | <b><math>\Delta E</math></b> | <b><math>\Delta ZPE</math></b> | <b><math>-T\Delta S</math></b> | <b><math>\Delta G_{\text{calc}}</math></b> | <b><math>\nu</math></b> |
| RS                           | -1541.8724892 | 130.38582  | 156.102  | 0.0                          | 0.0                            | 0.0                            | 0.0                                        | 24.0205                 |
| TS                           | -1541.8615694 | 130.42208  | 146.815  | 6.9                          | 0.04                           | 2.9                            | 9.8                                        | -311.5082               |
| PS                           | -1541.9334583 | 130.96407  | 152.615  | -38.3                        | 0.6                            | 1.1                            | -36.6                                      | 26.5388                 |

<sup>a</sup> RS, TS and PS denote the reactant, transition and product states, respectively. E, ZPE and S denote the absolute electronic energies, zero-point energies and entropies, and  $\Delta E$ ,  $\Delta ZPE$  and  $-T\Delta S$  denote the corresponding values relative to the RS (all values in kcal mol<sup>-1</sup>, except S which is presented in cal mol<sup>-1</sup> K<sup>-1</sup>).  $\nu$  denotes the first vibrational frequency (cm<sup>-1</sup>).

**Table S55.** Absolute and relative energy contributions to the calculated free energies ( $\Delta G_{\text{calc}}$ ) for the alkaline hydrolysis of substituted sulfate diesters in the presence of 2 additional explicit water molecules, obtained using the M062X<sup>4</sup> functional.<sup>a</sup>

| <b>4-chloro-3-nitro</b>      | <b>E</b>      | <b>ZPE</b> | <b>S</b> | <b><math>\Delta E</math></b> | <b><math>\Delta ZPE</math></b> | <b><math>-T\Delta S</math></b> | <b><math>\Delta G_{\text{calc}}</math></b> | <b><math>\nu</math></b> |
|------------------------------|---------------|------------|----------|------------------------------|--------------------------------|--------------------------------|--------------------------------------------|-------------------------|
| RS                           | -2055.1207362 | 158.94941  | 189.054  | 0.0                          | 0.0                            | 0.0                            | 0.0                                        | 25.6321                 |
| TS                           | -2055.1098227 | 159.91714  | 178.383  | 6.8                          | 1.0                            | 3.3                            | 11.1                                       | -286.8049               |
| PS                           | -2055.1628737 | 159.91984  | 190.532  | -26.4                        | 1.0                            | -0.5                           | -25.9                                      | 18.4388                 |
| <b>4-nitro</b>               | <b>E</b>      | <b>ZPE</b> | <b>S</b> | <b><math>\Delta E</math></b> | <b><math>\Delta ZPE</math></b> | <b><math>-T\Delta S</math></b> | <b><math>\Delta G_{\text{calc}}</math></b> | <b><math>\nu</math></b> |
| RS                           | -1595.1585719 | 164.92086  | 189.93   | 0.0                          | 0.0                            | 0.0                            | 0.0                                        | 15.3242                 |
| TS                           | -1595.1485956 | 165.40078  | 177.103  | 6.3                          | 0.5                            | 4.0                            | 10.8                                       | -292.9074               |
| PS                           | -1595.2115938 | 166.56085  | 178.44   | -33.3                        | 1.6                            | 3.6                            | -28.0                                      | 21.2865                 |
| <b>2,6-difluoro</b>          | <b>E</b>      | <b>ZPE</b> | <b>S</b> | <b><math>\Delta E</math></b> | <b><math>\Delta ZPE</math></b> | <b><math>-T\Delta S</math></b> | <b><math>\Delta G_{\text{calc}}</math></b> | <b><math>\nu</math></b> |
| RS                           | -1589.5139781 | 153.55655  | 176.472  | 0.0                          | 0.0                            | 0.0                            | 0.0                                        | 12.6314                 |
| TS                           | -1589.5084384 | 154.32346  | 164.288  | 3.5                          | 0.8                            | 3.8                            | 8.1                                        | -263.6809               |
| PS                           | -1589.5608268 | 154.86447  | 172.585  | -29.4                        | 1.3                            | 1.2                            | -26.9                                      | 13.7385                 |
| <b>2-fluoro-4-nitro</b>      | <b>E</b>      | <b>ZPE</b> | <b>S</b> | <b><math>\Delta E</math></b> | <b><math>\Delta ZPE</math></b> | <b><math>-T\Delta S</math></b> | <b><math>\Delta G_{\text{calc}}</math></b> | <b><math>\nu</math></b> |
| RS                           | -1694.7662152 | 159.96108  | 186.04   | 0.0                          | 0.0                            | 0.0                            | 0.0                                        | 16.8048                 |
| TS                           | -1694.7559900 | 160.02391  | 183.316  | 6.4                          | 0.1                            | 0.9                            | 7.4                                        | -287.2524               |
| PS                           | -1694.8218693 | 160.97527  | 188.798  | -34.9                        | 1.0                            | -0.9                           | -34.8                                      | 8.7122                  |
| <b>2,3,4,5,6-pentafluoro</b> | <b>E</b>      | <b>ZPE</b> | <b>S</b> | <b><math>\Delta E</math></b> | <b><math>\Delta ZPE</math></b> | <b><math>-T\Delta S</math></b> | <b><math>\Delta G_{\text{calc}}</math></b> | <b><math>\nu</math></b> |
| RS                           | -1887.1950942 | 138.44987  | 186.076  | 0.0                          | 0.0                            | 0.0                            | 0.0                                        | 20.7785                 |
| TS                           | -1887.1918690 | 138.86566  | 178.975  | 2.0                          | 0.4                            | 2.2                            | 4.6                                        | -242.4723               |
| PS                           | -1887.2553077 | 139.56447  | 185.411  | -37.8                        | 1.1                            | 0.2                            | -36.5                                      | 16.0994                 |
| <b>3-fluoro-4-nitro</b>      | <b>E</b>      | <b>ZPE</b> | <b>S</b> | <b><math>\Delta E</math></b> | <b><math>\Delta ZPE</math></b> | <b><math>-T\Delta S</math></b> | <b><math>\Delta G_{\text{calc}}</math></b> | <b><math>\nu</math></b> |
| RS                           | -1694.7628895 | 160.01382  | 186.428  | 0.0                          | 0.0                            | 0.0                            | 0.0                                        | 28.4589                 |
| TS                           | -1694.7524415 | 160.56909  | 177.313  | 6.6                          | 0.6                            | 2.9                            | 10.1                                       | -285.2326               |
| PS                           | -1694.8179632 | 161.09238  | 185.261  | -34.6                        | 1.1                            | 0.4                            | -33.1                                      | 25.7666                 |

<sup>a</sup> RS, TS and PS denote the reactant, transition and product states, respectively. E, ZPE and S denote the absolute electronic energies, zero-point energies and entropies, and  $\Delta E$ ,  $\Delta ZPE$  and  $-T\Delta S$  denote the corresponding values relative to the RS (all values in kcal mol<sup>-1</sup>, except S which is presented in cal mol<sup>-1</sup> K<sup>-1</sup>).  $\nu$  denotes the first vibrational frequency (cm<sup>-1</sup>).

**Table S56.** Absolute and relative energy contributions to the calculated free energies ( $\Delta G_{\text{calc}}$ ) for the alkaline hydrolysis of substituted sulfate diesters in the presence of 4 additional explicit water molecules, obtained using the M062X<sup>4</sup> functional.<sup>a</sup>

| <b>4-chloro-3-nitro</b>      | <b>E</b>      | <b>ZPE</b> | <b>S</b> | <b><math>\Delta E</math></b> | <b><math>\Delta ZPE</math></b> | <b><math>-T\Delta S</math></b> | <b><math>\Delta G_{\text{calc}}</math></b> | <b><math>\nu</math></b> |
|------------------------------|---------------|------------|----------|------------------------------|--------------------------------|--------------------------------|--------------------------------------------|-------------------------|
| RS                           | -2208.0122575 | 189.95869  | 215.269  | 0.0                          | 0.0                            | 0.0                            | 0.0                                        | 19.9339                 |
| TS                           | -2207.9979597 | 188.73019  | 220.196  | 9.0                          | -1.2                           | -1.5                           | 6.3                                        | -285.5131               |
| PS                           | -2208.0758671 | 192.54810  | 203.591  | -39.9                        | 2.6                            | 3.7                            | -33.7                                      | 24.2042                 |
| <b>4-nitro</b>               | <b>E</b>      | <b>ZPE</b> | <b>S</b> | <b><math>\Delta E</math></b> | <b><math>\Delta ZPE</math></b> | <b><math>-T\Delta S</math></b> | <b><math>\Delta G_{\text{calc}}</math></b> | <b><math>\nu</math></b> |
| RS                           | -1748.4273098 | 196.06219  | 208.126  | 0.0                          | 0.0                            | 0.0                            | 0.0                                        | 21.9257                 |
| TS                           | -1748.4097162 | 195.70859  | 208.107  | 11.0                         | -0.4                           | 0.01                           | 10.6                                       | -287.6699               |
| PS                           | -1748.4702918 | 197.12423  | 207.891  | -27.0                        | 1.1                            | 0.1                            | -25.8                                      | 25.862                  |
| <b>2,6-difluoro</b>          | <b>E</b>      | <b>ZPE</b> | <b>S</b> | <b><math>\Delta E</math></b> | <b><math>\Delta ZPE</math></b> | <b><math>-T\Delta S</math></b> | <b><math>\Delta G_{\text{calc}}</math></b> | <b><math>\nu</math></b> |
| RS                           | -1742.4059059 | 183.99968  | 202.582  | 0.0                          | 0.0                            | 0.0                            | 0.0                                        | 19.9971                 |
| TS                           | -1742.4002826 | 184.73336  | 195.444  | 3.5                          | 0.7                            | 2.2                            | 6.4                                        | -254.0158               |
| PS                           | -1742.4378561 | 184.81254  | 208.664  | -20.0                        | 0.8                            | -1.9                           | -21.1                                      | 14.5464                 |
| <b>2-fluoro-4-nitro</b>      | <b>E</b>      | <b>ZPE</b> | <b>S</b> | <b><math>\Delta E</math></b> | <b><math>\Delta ZPE</math></b> | <b><math>-T\Delta S</math></b> | <b><math>\Delta G_{\text{calc}}</math></b> | <b><math>\nu</math></b> |
| RS                           | -1847.6577928 | 190.12158  | 215.848  | 0.0                          | 0.0                            | 0.0                            | 0.0                                        | 22.5405                 |
| TS                           | -1847.6525576 | 191.31248  | 207.305  | 3.3                          | 1.2                            | 2.7                            | 7.2                                        | -250.3784               |
| PS                           | -1847.7387341 | 194.05504  | 201.412  | -50.8                        | 3.9                            | 4.5                            | -42.3                                      | 12.2827                 |
| <b>2,3,4,5,6-pentafluoro</b> | <b>E</b>      | <b>ZPE</b> | <b>S</b> | <b><math>\Delta E</math></b> | <b><math>\Delta ZPE</math></b> | <b><math>-T\Delta S</math></b> | <b><math>\Delta G_{\text{calc}}</math></b> | <b><math>\nu</math></b> |
| RS                           | -2040.0836239 | 167.75719  | 222.958  | 0.0                          | 0.0                            | 0.0                            | 0.0                                        | 22.5661                 |
| TS                           | -2040.0807041 | 168.61569  | 216.178  | 1.8                          | 0.9                            | 2.1                            | 4.8                                        | -229.391                |
| PS                           | -2040.1413948 | 169.68559  | 219.142  | -36.3                        | 1.9                            | 1.2                            | -33.1                                      | 13.3498                 |
| <b>3-fluoro-4-nitro</b>      | <b>E</b>      | <b>ZPE</b> | <b>S</b> | <b><math>\Delta E</math></b> | <b><math>\Delta ZPE</math></b> | <b><math>-T\Delta S</math></b> | <b><math>\Delta G_{\text{calc}}</math></b> | <b><math>\nu</math></b> |
| RS                           | -1847.6523257 | 190.45813  | 214.769  | 0.0                          | 0.0                            | 0.0                            | 0.0                                        | 18.2816                 |
| TS                           | -1847.6420810 | 190.53481  | 212.837  | 6.4                          | 0.1                            | 0.6                            | 7.1                                        | -292.3245               |
| PS                           | -1847.7025905 | 192.16771  | 214.846  | -31.5                        | 1.7                            | 0.0                            | -29.9                                      | 23.3278                 |

<sup>a</sup> RS, TS and PS denote the reactant, transition and product states, respectively. E, ZPE and S denote the absolute electronic energies, zero-point energies and entropies, and  $\Delta E$ ,  $\Delta ZPE$  and  $-T\Delta S$  denote the corresponding values relative to the RS (all values in kcal mol<sup>-1</sup>, except S which is presented in cal mol<sup>-1</sup> K<sup>-1</sup>).  $\nu$  denotes the first vibrational frequency (cm<sup>-1</sup>).

**Table S57.** Absolute and relative energy contributions to the calculated free energies ( $\Delta G_{\text{calc}}$ ) for the alkaline hydrolysis of substituted sulfate diesters in the presence of 8 additional explicit water molecules, obtained using the M062X<sup>4</sup> functional.<sup>a</sup>

| <b>4-chloro-3-nitro</b>      | <b>E</b>      | <b>ZPE</b> | <b>S</b> | <b><math>\Delta E</math></b> | <b><math>\Delta ZPE</math></b> | <b><math>-T\Delta S</math></b> | <b><math>\Delta G_{\text{calc}}</math></b> | <b><math>\nu</math></b> |
|------------------------------|---------------|------------|----------|------------------------------|--------------------------------|--------------------------------|--------------------------------------------|-------------------------|
| RS                           | -2513.7909346 | 253.34747  | 260.123  | 0.0                          | 0.0                            | 0.0                            | 0.0                                        | 21.437                  |
| TS                           | -2513.7737635 | 253.38714  | 254.641  | 10.8                         | 0.04                           | 1.7                            | 12.5                                       | -279.4276               |
| PS                           | -2513.8669030 | 256.52395  | 246.337  | -47.7                        | 3.2                            | 4.3                            | -40.2                                      | 17.5961                 |
| <b>4-nitro</b>               | <b>E</b>      | <b>ZPE</b> | <b>S</b> | <b><math>\Delta E</math></b> | <b><math>\Delta ZPE</math></b> | <b><math>-T\Delta S</math></b> | <b><math>\Delta G_{\text{calc}}</math></b> | <b><math>\nu</math></b> |
| RS                           | -2054.1986122 | 258.61012  | 261.306  | 0.0                          | 0.0                            | 0.0                            | 0.0                                        | 19.785                  |
| TS                           | -2054.1855888 | 258.95387  | 258.979  | 8.2                          | 0.3                            | 0.7                            | 9.2                                        | -283.7645               |
| PS                           | -2054.2672984 | 261.38123  | 250.497  | -43.1                        | 2.8                            | 3.4                            | -36.9                                      | 20.118                  |
| <b>2,6-difluoro</b>          | <b>E</b>      | <b>ZPE</b> | <b>S</b> | <b><math>\Delta E</math></b> | <b><math>\Delta ZPE</math></b> | <b><math>-T\Delta S</math></b> | <b><math>\Delta G_{\text{calc}}</math></b> | <b><math>\nu</math></b> |
| RS                           | -2048.1832695 | 246.33395  | 252.61   | 0.0                          | 0.0                            | 0.0                            | 0.0                                        | 22.5942                 |
| TS                           | -2048.1633144 | 246.38654  | 260.715  | 12.5                         | 0.1                            | -2.5                           | 10.1                                       | -266.2105               |
| PS                           | -2048.2254820 | 248.24379  | 249.356  | -26.5                        | 1.9                            | 1.0                            | -23.6                                      | 19.2489                 |
| <b>2-fluoro-4-nitro</b>      | <b>E</b>      | <b>ZPE</b> | <b>S</b> | <b><math>\Delta E</math></b> | <b><math>\Delta ZPE</math></b> | <b><math>-T\Delta S</math></b> | <b><math>\Delta G_{\text{calc}}</math></b> | <b><math>\nu</math></b> |
| RS                           | -2153.4343846 | 253.86993  | 261.213  | 0.0                          | 0.0                            | 0.0                            | 0.0                                        | 26.7784                 |
| TS                           | -2153.4243330 | 254.63689  | 257.159  | 6.3                          | 0.8                            | 1.3                            | 8.4                                        | -275.8933               |
| PS                           | -2153.5234315 | 257.25805  | 241.666  | -55.9                        | 3.4                            | 6.1                            | -46.4                                      | 19.9415                 |
| <b>2,3,4,5,6-pentafluoro</b> | <b>E</b>      | <b>ZPE</b> | <b>S</b> | <b><math>\Delta E</math></b> | <b><math>\Delta ZPE</math></b> | <b><math>-T\Delta S</math></b> | <b><math>\Delta G_{\text{calc}}</math></b> | <b><math>\nu</math></b> |
| RS                           | -2345.8626304 | 230.60870  | 268.447  | 0.0                          | 0.0                            | 0.0                            | 0.0                                        | 25.7861                 |
| TS                           | -2345.8536709 | 233.20247  | 258.991  | 5.6                          | 2.6                            | 3.0                            | 11.2                                       | -265.0677               |
| PS                           | -2345.9524015 | 233.84567  | 253.307  | -56.3                        | 3.2                            | 4.7                            | -48.4                                      | 21.7803                 |
| <b>3-fluoro-4-nitro</b>      | <b>E</b>      | <b>ZPE</b> | <b>S</b> | <b><math>\Delta E</math></b> | <b><math>\Delta ZPE</math></b> | <b><math>-T\Delta S</math></b> | <b><math>\Delta G_{\text{calc}}</math></b> | <b><math>\nu</math></b> |
| RS                           | -2153.4318381 | 253.79773  | 262.279  | 0.0                          | 0.0                            | 0.0                            | 0.0                                        | 24.0739                 |
| TS                           | -2153.4202168 | 254.34733  | 256.71   | 7.3                          | 0.5                            | 1.7                            | 9.5                                        | -275.3139               |
| PS                           | -2153.4952908 | 256.84594  | 252.461  | -39.8                        | 3.0                            | 3.1                            | -33.7                                      | 23.4957                 |

<sup>a</sup> RS, TS and PS denote the reactant, transition and product states, respectively. E, ZPE and S denote the absolute electronic energies, zero-point energies and entropies, and  $\Delta E$ ,  $\Delta ZPE$  and  $-T\Delta S$  denote the corresponding values relative to the RS (all values in kcal mol<sup>-1</sup>, except S which is presented in cal mol<sup>-1</sup> K<sup>-1</sup>).  $\nu$  denotes the first vibrational frequency (cm<sup>-1</sup>).

**Table S58.** Partial charges at the transition state for the alkaline hydrolysis of substituted sulfate diesters in the presence of 0 additional explicit water molecules (pure implicit solvation), obtained using the  $\omega$ B97X-D<sup>3</sup> functional.<sup>a</sup>

| <b>Water Molecules</b> | <b>O<sub>nuc</sub></b> | <b>S</b> | <b>O<sub>lg</sub></b> |
|------------------------|------------------------|----------|-----------------------|
| 4-chloro-3-nitro       | -1.111641              | 1.232147 | -0.572697             |
| 4-nitro                | -1.116133              | 1.259782 | -0.58486              |
| 2,6-difluoro           | -1.10774               | 1.19289  | -0.471096             |
| 2-fluoro-4-nitro       | -1.121515              | 1.219911 | -0.527337             |
| 2,3,4,5,6-pentafluoro  | -1.123791              | 1.119482 | -0.400261             |
| 3-fluoro-4-nitro       | -1.120591              | 1.231624 | -0.559804             |

<sup>a</sup> Partial charges are calculated using the CHELPG<sup>5</sup> charge calculation scheme, as described in the **Methodology** section.

**Table S59.** Partial charges at the transition state for the alkaline hydrolysis of substituted sulfate diesters in the presence of 2 additional explicit water molecules, obtained using the  $\omega$ B97X-D<sup>3</sup> functional.<sup>a</sup>

| <b>Water Molecules</b> | <b>O<sub>nuc</sub></b> | <b>S</b> | <b>O<sub>lg</sub></b> |
|------------------------|------------------------|----------|-----------------------|
| 4-chloro-3-nitro       | -1.052228              | 1.154162 | -0.505857             |
| 4-nitro                | -1.056234              | 1.117773 | -0.4649               |
| 2,6-difluoro           | -1.115392              | 1.211859 | -0.463366             |
| 2-fluoro-4-nitro       | -1.056456              | 1.065096 | -0.405403             |
| 2,3,4,5,6-pentafluoro  | -1.133838              | 1.125565 | -0.377429             |
| 3-fluoro-4-nitro       | -1.068044              | 1.115811 | -0.464594             |

<sup>a</sup> Partial charges are calculated using the CHELPG<sup>5</sup> charge calculation scheme, as described in the **Methodology** section.

**Table S60.** Partial charges at the transition state for the alkaline hydrolysis of substituted sulfate diesters in the presence of 4 additional explicit water molecules, obtained using the  $\omega$ B97X-D<sup>3</sup> functional.<sup>a</sup>

| Water Molecules       | O <sub>nuc</sub> | S        | O <sub>lg</sub> |
|-----------------------|------------------|----------|-----------------|
| 4-chloro-3-nitro      | -0.906699        | 1.15772  | -0.430702       |
| 4-nitro               | -0.903971        | 1.094185 | -0.427313       |
| 2,6-difluoro          | -0.946515        | 0.981219 | -0.312967       |
| 2-fluoro-4-nitro      | -0.936568        | 0.995378 | -0.372016       |
| 2,3,4,5,6-pentafluoro | -0.919628        | 0.973341 | 0.029137        |
| 3-fluoro-4-nitro      | -0.911288        | 0.975482 | -0.438907       |

<sup>a</sup> Partial charges are calculated using the CHELPG<sup>5</sup> charge calculation scheme, as described in the **Methodology** section.

**Table S61.** Partial charges at the transition state for the alkaline hydrolysis of substituted sulfate diesters in the presence of 8 additional explicit water molecules, obtained using the  $\omega$ B97X-D<sup>3</sup> functional.<sup>a</sup>

| Water Molecules       | O <sub>nuc</sub> | S        | O <sub>lg</sub> |
|-----------------------|------------------|----------|-----------------|
| 4-chloro-3-nitro      | -0.818968        | 1.53004  | -0.557081       |
| 4-nitro               | -0.808109        | 1.375266 | -0.539817       |
| 2,6-difluoro          | -0.719478        | 1.129583 | -0.187656       |
| 2-fluoro-4-nitro      | -0.794135        | 1.115757 | -0.309453       |
| 2,3,4,5,6-pentafluoro | -0.648572        | 0.903609 | 0.131355        |
| 3-fluoro-4-nitro      | -0.889096        | 1.226026 | -0.545571       |

<sup>a</sup> Partial charges are calculated using the CHELPG<sup>5</sup> charge calculation scheme, as described in the **Methodology** section.

**Table S62.** Partial charges at the transition state for the alkaline hydrolysis of substituted sulfate diesters in the presence of 0 additional explicit water molecules (pure implicit solvation), obtained using the M11L<sup>1</sup> functional.<sup>a</sup>

| Water Molecules       | O <sub>nuc</sub> | S        | O <sub>lg</sub> |
|-----------------------|------------------|----------|-----------------|
| 4-chloro-3-nitro      | -1.126065        | 1.238842 | -0.581367       |
| 4-nitro               | -1.128893        | 1.244377 | -0.588531       |
| 2,6-difluoro          | -1.123921        | 1.210062 | -0.475852       |
| 2-fluoro-4-nitro      | -1.131816        | 1.20932  | -0.523576       |
| 2,3,4,5,6-pentafluoro | -1.126397        | 1.120806 | -0.396262       |
| 3-fluoro-4-nitro      | -1.139186        | 1.221296 | -0.559813       |

<sup>a</sup> Partial charges are calculated using the CHELPG<sup>5</sup> charge calculation scheme, as described in the **Methodology** section.

**Table S63.** Partial charges at the transition state for the alkaline hydrolysis of substituted sulfate diesters in the presence of 2 additional explicit water molecules, obtained using the M11L<sup>1</sup> functional.<sup>a</sup>

| Water Molecules       | O <sub>nuc</sub> | S        | O <sub>lg</sub> |
|-----------------------|------------------|----------|-----------------|
| 4-chloro-3-nitro      | -1.054268        | 1.177652 | -0.516051       |
| 4-nitro               | -1.048351        | 1.173881 | -0.508858       |
| 2,6-difluoro          | -1.107014        | 1.239456 | -0.483114       |
| 2-fluoro-4-nitro      | -1.064281        | 1.138652 | -0.434989       |
| 2,3,4,5,6-pentafluoro | -1.155153        | 1.095868 | -0.355669       |
| 3-fluoro-4-nitro      | -1.060325        | 1.167686 | -0.493242       |

<sup>a</sup> Partial charges are calculated using the CHELPG<sup>5</sup> charge calculation scheme, as described in the **Methodology** section.



**Table S64.** Partial charges at the transition state for the alkaline hydrolysis of substituted sulfate diesters in the presence of 4 additional explicit water molecules, obtained using the M11L<sup>1</sup> functional.<sup>a</sup>

| <b>Water Molecules</b> | <b>O<sub>nuc</sub></b> | <b>S</b> | <b>O<sub>lg</sub></b> |
|------------------------|------------------------|----------|-----------------------|
| 4-chloro-3-nitro       | -0.869986              | 1.038718 | -0.332873             |
| 4-nitro                | -0.922275              | 1.035309 | -0.383091             |
| 2,6-difluoro           | -0.915672              | 0.973609 | -0.273618             |
| 2-fluoro-4-nitro       | -0.905535              | 0.953933 | -0.305688             |
| 2,3,4,5,6-pentafluoro  | -0.878166              | 0.980448 | 0.092381              |
| 3-fluoro-4-nitro       | -1.006325              | 0.933329 | -0.364949             |

<sup>a</sup> Partial charges are calculated using the CHELPG<sup>5</sup> charge calculation scheme, as described in the **Methodology** section.

**Table S65.** Partial charges at the transition state for the alkaline hydrolysis of substituted sulfate diesters in the presence of 8 additional explicit water molecules, obtained using the M11L<sup>1</sup> functional.<sup>a</sup>

| <b>Water Molecules</b> | <b>O<sub>nuc</sub></b> | <b>S</b> | <b>O<sub>lg</sub></b> |
|------------------------|------------------------|----------|-----------------------|
| 4-chloro-3-nitro       | -0.770574              | 1.310195 | -0.37252              |
| 4-nitro                | -0.809259              | 1.14282  | -0.477867             |
| 2,6-difluoro           | -0.720382              | 1.157698 | -0.205206             |
| 2-fluoro-4-nitro       | -0.850967              | 1.064396 | -0.333301             |
| 2,3,4,5,6-pentafluoro  | -0.688973              | 0.802573 | 0.075625              |
| 3-fluoro-4-nitro       | -0.822024              | 1.283624 | -0.535008             |

<sup>a</sup> Partial charges are calculated using the CHELPG<sup>5</sup> charge calculation scheme, as described in the **Methodology** section.

**Table S66.** Partial charges at the transition state for the alkaline hydrolysis of substituted sulfate diesters in the presence of 0 additional explicit water molecules (pure implicit solvation), obtained using the M062X<sup>4</sup> functional.<sup>a</sup>

| <b>Water Molecules</b> | <b>O<sub>nuc</sub></b> | <b>S</b> | <b>O<sub>lg</sub></b> |
|------------------------|------------------------|----------|-----------------------|
| 4-chloro-3-nitro       | -1.138291              | 1.236014 | -0.564708             |
| 4-nitro                | -1.139127              | 1.250009 | -0.560361             |
| 2,6-difluoro           | -1.136644              | 1.210623 | -0.464085             |
| 2-fluoro-4-nitro       | -1.140526              | 1.206306 | -0.502166             |
| 2,3,4,5,6-pentafluoro  | -1.144043              | 1.084718 | -0.393913             |
| 3-fluoro-4-nitro       | -1.142764              | 1.240041 | -0.545671             |

<sup>a</sup> Partial charges are calculated using the CHELPG<sup>5</sup> charge calculation scheme, as described in the **Methodology** section.

**Table S67.** Partial charges at the transition state for the alkaline hydrolysis of substituted sulfate diesters in the presence of 2 additional explicit water molecules, obtained using the M062X<sup>4</sup> functional.<sup>a</sup>

| <b>Water Molecules</b> | <b>O<sub>nuc</sub></b> | <b>S</b> | <b>O<sub>lg</sub></b> |
|------------------------|------------------------|----------|-----------------------|
| 4-chloro-3-nitro       | -1.049775              | 1.22034  | -0.521161             |
| 4-nitro                | -1.048017              | 1.195557 | -0.504796             |
| 2,6-difluoro           | -1.12217               | 1.205036 | -0.437561             |
| 2-fluoro-4-nitro       | -1.055519              | 1.124415 | -0.423785             |
| 2,3,4,5,6-pentafluoro  | -1.159782              | 1.115634 | -0.352506             |
| 3-fluoro-4-nitro       | -1.052143              | 1.212126 | -0.498027             |

<sup>a</sup> Partial charges are calculated using the CHELPG<sup>5</sup> charge calculation scheme, as described in the **Methodology** section.

**Table S68.** Partial charges at the transition state for the alkaline hydrolysis of substituted sulfate diesters in the presence of 4 additional explicit water molecules, obtained using the M062X<sup>4</sup> functional.<sup>a</sup>

| <b>Water Molecules</b> | <b>O<sub>nuc</sub></b> | <b>S</b> | <b>O<sub>lg</sub></b> |
|------------------------|------------------------|----------|-----------------------|
| 4-chloro-3-nitro       | -0.950593              | 1.076789 | -0.408504             |
| 4-nitro                | -0.959323              | 1.082878 | -0.417571             |
| 2,6-difluoro           | -1.002794              | 1.001605 | -0.285461             |
| 2-fluoro-4-nitro       | -0.989268              | 0.998185 | -0.323282             |
| 2,3,4,5,6-pentafluoro  | -1.004115              | 1.026607 | 0.042262              |
| 3-fluoro-4-nitro       | -1.035300              | 1.000186 | -0.418766             |

<sup>a</sup> Partial charges are calculated using the CHELPG<sup>5</sup> charge calculation scheme, as described in the **Methodology** section.

**Table S69.** Partial charges at the transition state for the alkaline hydrolysis of substituted sulfate diesters in the presence of 8 additional explicit water molecules, obtained using the M062X<sup>4</sup> functional.<sup>a</sup>

| <b>Water Molecules</b> | <b>O<sub>nuc</sub></b> | <b>S</b> | <b>O<sub>lg</sub></b> |
|------------------------|------------------------|----------|-----------------------|
| 4-chloro-3-nitro       | -0.94733               | 1.313362 | -0.498923             |
| 4-nitro                | -0.854524              | 1.254148 | -0.535374             |
| 2,6-difluoro           | -0.825784              | 1.061389 | -0.11393              |
| 2-fluoro-4-nitro       | -0.927407              | 1.060805 | -0.306961             |
| 2,3,4,5,6-pentafluoro  | -0.739404              | 0.712602 | -0.238053             |
| 3-fluoro-4-nitro       | -0.789773              | 1.301197 | -0.50345              |

<sup>a</sup> Partial charges are calculated using the CHELPG<sup>5</sup> charge calculation scheme, as described in the **Methodology** section.

**Table S70.** Partial charges at key stationary points for the alkaline hydrolysis of substituted sulfate diesters in the presence of 0 additional explicit water molecules (pure implicit solvation), obtained using the  $\omega$ B97X-D<sup>3</sup> functional.<sup>a</sup>

| <b>4-chloro-3-nitro</b>      | <b>O<sub>nuc</sub></b> | <b>S</b> | <b>O<sub>lg</sub></b> |
|------------------------------|------------------------|----------|-----------------------|
| RS                           | -1.291921              | 1.096961 | -0.387663             |
| TS                           | -1.111641              | 1.232147 | -0.572697             |
| PS                           | -0.509717              | 1.072833 | -0.855893             |
| <b>4-nitro</b>               | <b>O<sub>nuc</sub></b> | <b>S</b> | <b>O<sub>lg</sub></b> |
| RS                           | -1.296563              | 1.12486  | -0.391163             |
| TS                           | -1.116133              | 1.259782 | -0.58486              |
| PS                           | -0.537492              | 1.114613 | -0.804766             |
| <b>2,6-difluoro</b>          | <b>O<sub>nuc</sub></b> | <b>S</b> | <b>O<sub>lg</sub></b> |
| RS                           | -1.323328              | 1.183321 | -0.347723             |
| TS                           | -1.10774               | 1.19289  | -0.471096             |
| PS                           | -0.605661              | 1.191238 | -0.802531             |
| <b>2-fluoro-4-nitro</b>      | <b>O<sub>nuc</sub></b> | <b>S</b> | <b>O<sub>lg</sub></b> |
| RS                           | -1.296515              | 1.091244 | -0.338531             |
| TS                           | -1.121515              | 1.219911 | -0.527337             |
| PS                           | -0.582166              | 1.231353 | -0.770628             |
| <b>2,3,4,5,6-pentafluoro</b> | <b>O<sub>nuc</sub></b> | <b>S</b> | <b>O<sub>lg</sub></b> |
| RS                           | -1.307134              | 1.160055 | -0.296363             |
| TS                           | -1.123791              | 1.119482 | -0.400261             |
| PS                           | -0.509743              | 1.102915 | -0.782979             |
| <b>3-fluoro-4-nitro</b>      | <b>O<sub>nuc</sub></b> | <b>S</b> | <b>O<sub>lg</sub></b> |
| RS                           | -1.296716              | 1.091253 | -0.374008             |
| TS                           | -1.120591              | 1.231624 | -0.559804             |
| PS                           | -0.578857              | 1.21737  | -0.798075             |

<sup>a</sup> RS, TS and PS denote the reactant, transition and product states, respectively. Partial charges are calculated using the CHELPG<sup>5</sup> charge calculation scheme, as described in the **Methodology** section.

**Table S71.** Partial charges at key stationary points for the alkaline hydrolysis of substituted sulfate diesters in the presence of 2 additional explicit water molecules, obtained using the  $\omega$ B97X-D<sup>3</sup> functional.<sup>a</sup>

| <b>4-chloro-3-nitro</b>      | <b>O<sub>nuc</sub></b> | <b>S</b> | <b>O<sub>lg</sub></b> |
|------------------------------|------------------------|----------|-----------------------|
| RS                           | -1.205177              | 1.139172 | -0.406195             |
| TS                           | -1.052228              | 1.154162 | -0.505857             |
| PS                           | -0.50458               | 1.091234 | -0.85603              |
| <b>4-nitro</b>               | <b>O<sub>nuc</sub></b> | <b>S</b> | <b>O<sub>lg</sub></b> |
| RS                           | -1.135373              | 1.179743 | -0.392427             |
| TS                           | -1.056234              | 1.117773 | -0.4649               |
| PS                           | -0.521243              | 1.113486 | -0.801443             |
| <b>2,6-difluoro</b>          | <b>O<sub>nuc</sub></b> | <b>S</b> | <b>O<sub>lg</sub></b> |
| RS                           | -1.193485              | 1.176152 | -0.351537             |
| TS                           | -1.115392              | 1.211859 | -0.463366             |
| PS                           | -0.529381              | 1.099076 | -0.811984             |
| <b>2-fluoro-4-nitro</b>      | <b>O<sub>nuc</sub></b> | <b>S</b> | <b>O<sub>lg</sub></b> |
| RS                           | -1.201943              | 1.11984  | -0.377146             |
| TS                           | -1.056456              | 1.065096 | -0.405403             |
| PS                           | -0.501699              | 1.100824 | -0.750857             |
| <b>2,3,4,5,6-pentafluoro</b> | <b>O<sub>nuc</sub></b> | <b>S</b> | <b>O<sub>lg</sub></b> |
| RS                           | -1.219956              | 1.041389 | -0.237303             |
| TS                           | -1.133838              | 1.125565 | -0.377429             |
| PS                           | -0.477058              | 1.01544  | -0.741634             |
| <b>3-fluoro-4-nitro</b>      | <b>O<sub>nuc</sub></b> | <b>S</b> | <b>O<sub>lg</sub></b> |
| RS                           | -1.200008              | 1.125621 | -0.377                |
| TS                           | -1.068044              | 1.115811 | -0.464594             |
| PS                           | -0.515291              | 1.049907 | -0.812597             |

<sup>a</sup> RS, TS and PS denote the reactant, transition and product states, respectively. Partial charges are calculated using the CHELPG<sup>5</sup> charge calculation scheme, as described in the **Methodology** section.

**Table S72.** Partial charges at key stationary points for the alkaline hydrolysis of substituted sulfate diesters in the presence of 4 additional explicit water molecules, obtained using the  $\omega$ B97X-D<sup>3</sup> functional.<sup>a</sup>

| <b>4-chloro-3-nitro</b>      | <b>O<sub>nuc</sub></b> | <b>S</b> | <b>O<sub>lg</sub></b> |
|------------------------------|------------------------|----------|-----------------------|
| RS                           | -1.229317              | 1.041916 | -0.341015             |
| TS                           | -0.906699              | 1.15772  | -0.430702             |
| PS                           | -0.479935              | 0.96767  | -0.755464             |
| <b>4-nitro</b>               | <b>O<sub>nuc</sub></b> | <b>S</b> | <b>O<sub>lg</sub></b> |
| RS                           | -1.236077              | 1.037997 | -0.390759             |
| TS                           | -0.903971              | 1.094185 | -0.427313             |
| PS                           | -0.903971              | 1.094185 | -0.427313             |
| <b>2,6-difluoro</b>          | <b>O<sub>nuc</sub></b> | <b>S</b> | <b>O<sub>lg</sub></b> |
| RS                           | -1.088478              | 0.971709 | -0.220458             |
| TS                           | -0.946515              | 0.981219 | -0.312967             |
| PS                           | -0.515885              | 0.992838 | -0.707345             |
| <b>2-fluoro-4-nitro</b>      | <b>O<sub>nuc</sub></b> | <b>S</b> | <b>O<sub>lg</sub></b> |
| RS                           | -1.085704              | 0.989754 | -0.264487             |
| TS                           | -0.936568              | 0.995378 | -0.372016             |
| PS                           | -0.500829              | 1.017799 | -0.776886             |
| <b>2,3,4,5,6-pentafluoro</b> | <b>O<sub>nuc</sub></b> | <b>S</b> | <b>O<sub>lg</sub></b> |
| RS                           | -1.092728              | 0.966197 | -0.002528             |
| TS                           | -0.919628              | 0.973341 | 0.029137              |
| PS                           | -0.512507              | 1.054881 | -0.696406             |
| <b>3-fluoro-4-nitro</b>      | <b>O<sub>nuc</sub></b> | <b>S</b> | <b>O<sub>lg</sub></b> |
| RS                           | -1.246425              | 0.990739 | -0.357892             |
| TS                           | -0.911288              | 0.975482 | -0.438907             |
| PS                           | -0.602037              | 1.111286 | -0.819751             |

<sup>a</sup> RS, TS and PS denote the reactant, transition and product states, respectively. Partial charges are calculated using the CHELPG<sup>5</sup> charge calculation scheme, as described in the **Methodology** section.

**Table S73.** Partial charges at key stationary points for the alkaline hydrolysis of substituted sulfate diesters in the presence of 8 additional explicit water molecules, obtained using the  $\omega$ B97X-D<sup>3</sup> functional.<sup>a</sup>

| <b>4-chloro-3-nitro</b>      | <b>O<sub>nuc</sub></b> | <b>S</b> | <b>O<sub>lg</sub></b> |
|------------------------------|------------------------|----------|-----------------------|
| RS                           | -0.718829              | 1.146725 | -0.413029             |
| TS                           | -0.818968              | 1.53004  | -0.557081             |
| PS                           | -0.419947              | 0.891689 | -0.805632             |
| <b>4-nitro</b>               | <b>O<sub>nuc</sub></b> | <b>S</b> | <b>O<sub>lg</sub></b> |
| RS                           | -1.016168              | 1.025112 | -0.394967             |
| TS                           | -0.808109              | 1.375266 | -0.539817             |
| PS                           | -0.551013              | 0.968566 | -0.730409             |
| <b>2,6-difluoro</b>          | <b>O<sub>nuc</sub></b> | <b>S</b> | <b>O<sub>lg</sub></b> |
| RS                           | -0.962349              | 1.128122 | -0.29799              |
| TS                           | -0.719478              | 1.129583 | -0.187656             |
| PS                           | -0.49093               | 1.060843 | -0.673744             |
| <b>2-fluoro-4-nitro</b>      | <b>O<sub>nuc</sub></b> | <b>S</b> | <b>O<sub>lg</sub></b> |
| RS                           | -1.027716              | 1.108502 | -0.489306             |
| TS                           | -0.794135              | 1.115757 | -0.309453             |
| PS                           | -0.433804              | 0.912395 | -0.505965             |
| <b>2,3,4,5,6-pentafluoro</b> | <b>O<sub>nuc</sub></b> | <b>S</b> | <b>O<sub>lg</sub></b> |
| RS                           | -1.058844              | 0.899329 | -0.193228             |
| TS                           | -0.648572              | 0.903609 | 0.131355              |
| PS                           | -0.58977               | 1.110336 | -0.706082             |
| <b>3-fluoro-4-nitro</b>      | <b>O<sub>nuc</sub></b> | <b>S</b> | <b>O<sub>lg</sub></b> |
| RS                           | -0.976802              | 1.184277 | -0.393949             |
| TS                           | -0.889096              | 1.226026 | -0.545571             |
| PS                           | -0.617534              | 1.044413 | -0.770858             |

<sup>a</sup> RS, TS and PS denote the reactant, transition and product states, respectively. Partial charges are calculated using the CHELPG<sup>5</sup> charge calculation scheme, as described in the **Methodology** section.

**Table S74.** Partial charges at key stationary points for the alkaline hydrolysis of substituted sulfate diesters in the presence of 0 additional explicit water molecules (pure implicit solvation), obtained using the M11L<sup>1</sup> functional.<sup>a</sup>

| <b>4-chloro-3-nitro</b>      | <b>O<sub>nuc</sub></b> | <b>S</b> | <b>O<sub>lg</sub></b> |
|------------------------------|------------------------|----------|-----------------------|
| RS                           | -1.283734              | 1.078308 | -0.382041             |
| TS                           | -1.126065              | 1.238842 | -0.581367             |
| PS                           | -0.556229              | 1.119408 | -0.845815             |
| <b>4-nitro</b>               | <b>O<sub>nuc</sub></b> | <b>S</b> | <b>O<sub>lg</sub></b> |
| RS                           | -1.284482              | 1.080957 | -0.379139             |
| TS                           | -1.128893              | 1.244377 | -0.588531             |
| PS                           | -0.585248              | 1.238508 | -0.772942             |
| <b>2,6-difluoro</b>          | <b>O<sub>nuc</sub></b> | <b>S</b> | <b>O<sub>lg</sub></b> |
| RS                           | -1.325572              | 1.136336 | -0.317996             |
| TS                           | -1.123921              | 1.210062 | -0.475852             |
| PS                           | -0.528407              | 1.121804 | -0.783681             |
| <b>2-fluoro-4-nitro</b>      | <b>O<sub>nuc</sub></b> | <b>S</b> | <b>O<sub>lg</sub></b> |
| RS                           | -1.277816              | 1.019658 | -0.314991             |
| TS                           | -1.131816              | 1.20932  | -0.523576             |
| PS                           | -0.549292              | 1.10734  | -0.737144             |
| <b>2,3,4,5,6-pentafluoro</b> | <b>O<sub>nuc</sub></b> | <b>S</b> | <b>O<sub>lg</sub></b> |
| RS                           | -1.288597              | 0.996416 | -0.243606             |
| TS                           | -1.126397              | 1.120806 | -0.396262             |
| PS                           | -0.541094              | 1.095936 | -0.769538             |
| <b>3-fluoro-4-nitro</b>      | <b>O<sub>nuc</sub></b> | <b>S</b> | <b>O<sub>lg</sub></b> |
| RS                           | -1.285697              | 1.028887 | -0.352591             |
| TS                           | -1.139186              | 1.221296 | -0.559813             |
| PS                           | -0.554839              | 1.120693 | -0.780017             |

<sup>a</sup> RS, TS and PS denote the reactant, transition and product states, respectively. Partial charges are calculated using the CHELPG<sup>5</sup> charge calculation scheme, as described in the **Methodology** section.



**Table S75.** Partial charges at key stationary points for the alkaline hydrolysis of substituted sulfate diesters in the presence of 2 additional explicit water molecules, obtained using the M11L<sup>1</sup> functional.<sup>a</sup>

| <b>4-chloro-3-nitro</b>      | <b>O<sub>nuc</sub></b> | <b>S</b> | <b>O<sub>lg</sub></b> |
|------------------------------|------------------------|----------|-----------------------|
| RS                           | -1.193072              | 1.083588 | -0.38828              |
| TS                           | -1.054268              | 1.177652 | -0.516051             |
| PS                           | -0.592371              | 1.058217 | -0.851023             |
| <b>4-nitro</b>               | <b>O<sub>nuc</sub></b> | <b>S</b> | <b>O<sub>lg</sub></b> |
| RS                           | -1.188192              | 1.032376 | -0.357577             |
| TS                           | -1.048351              | 1.173881 | -0.508858             |
| PS                           | -0.546385              | 1.050097 | -0.769466             |
| <b>2,6-difluoro</b>          | <b>O<sub>nuc</sub></b> | <b>S</b> | <b>O<sub>lg</sub></b> |
| RS                           | -1.227928              | 1.033377 | -0.336466             |
| TS                           | -1.107014              | 1.239456 | -0.483114             |
| PS                           | -0.499219              | 1.156265 | -0.795488             |
| <b>2-fluoro-4-nitro</b>      | <b>O<sub>nuc</sub></b> | <b>S</b> | <b>O<sub>lg</sub></b> |
| RS                           | -1.183884              | 0.997508 | -0.345811             |
| TS                           | -1.064281              | 1.138652 | -0.434989             |
| PS                           | -0.604822              | 1.038779 | -0.733007             |
| <b>2,3,4,5,6-pentafluoro</b> | <b>O<sub>nuc</sub></b> | <b>S</b> | <b>O<sub>lg</sub></b> |
| RS                           | -1.224148              | 0.98398  | -0.234458             |
| TS                           | -1.155153              | 1.095868 | -0.355669             |
| PS                           | -0.520891              | 1.03032  | -0.724211             |
| <b>3-fluoro-4-nitro</b>      | <b>O<sub>nuc</sub></b> | <b>S</b> | <b>O<sub>lg</sub></b> |
| RS                           | -1.196171              | 1.072024 | -0.374475             |
| TS                           | -1.060325              | 1.167686 | -0.493242             |
| PS                           | -0.574846              | 1.083251 | -0.767394             |

<sup>a</sup> RS, TS and PS denote the reactant, transition and product states, respectively. Partial charges are calculated using the CHELPG<sup>5</sup> charge calculation scheme, as described in the **Methodology** section.

**Table S76.** Partial charges at key stationary points for the alkaline hydrolysis of substituted sulfate diesters in the presence of 4 additional explicit water molecules, obtained using the M11L<sup>1</sup> functional.<sup>a</sup>

| <b>4-chloro-3-nitro</b>      | <b>O<sub>nuc</sub></b> | <b>S</b> | <b>O<sub>lg</sub></b> |
|------------------------------|------------------------|----------|-----------------------|
| RS                           | -1.293306              | 0.996599 | -0.396281             |
| TS                           | -0.869986              | 1.038718 | -0.332873             |
| PS                           | -0.48212               | 1.019022 | -0.745712             |
| <b>4-nitro</b>               | <b>O<sub>nuc</sub></b> | <b>S</b> | <b>O<sub>lg</sub></b> |
| RS                           | -1.247046              | 0.996753 | -0.367373             |
| TS                           | -0.922275              | 1.035309 | -0.383091             |
| PS                           | -0.360786              | 0.822035 | -0.70989              |
| <b>2,6-difluoro</b>          | <b>O<sub>nuc</sub></b> | <b>S</b> | <b>O<sub>lg</sub></b> |
| RS                           | -1.101469              | 0.929305 | -0.220078             |
| TS                           | -0.915672              | 0.973609 | -0.273618             |
| PS                           | -0.625749              | 1.041767 | -0.770563             |
| <b>2-fluoro-4-nitro</b>      | <b>O<sub>nuc</sub></b> | <b>S</b> | <b>O<sub>lg</sub></b> |
| RS                           | -1.100258              | 0.907941 | -0.222727             |
| TS                           | -0.905535              | 0.953933 | -0.305688             |
| PS                           | -0.520253              | 0.94726  | -0.723689             |
| <b>2,3,4,5,6-pentafluoro</b> | <b>O<sub>nuc</sub></b> | <b>S</b> | <b>O<sub>lg</sub></b> |
| RS                           | -1.082253              | 0.980383 | -0.17232              |
| TS                           | -0.878166              | 0.980448 | 0.092381              |
| PS                           | -0.50781               | 0.949684 | -0.621905             |
| <b>3-fluoro-4-nitro</b>      | <b>O<sub>nuc</sub></b> | <b>S</b> | <b>O<sub>lg</sub></b> |
| RS                           | -1.247119              | 0.994394 | -0.298148             |
| TS                           | -1.006325              | 0.933329 | -0.364949             |
| PS                           | -0.610627              | 1.19919  | -0.758327             |

<sup>a</sup> RS, TS and PS denote the reactant, transition and product states, respectively. Partial charges are calculated using the CHELPG<sup>5</sup> charge calculation scheme, as described in the **Methodology** section.

**Table S77.** Partial charges at key stationary points for the alkaline hydrolysis of substituted sulfate diesters in the presence of 8 additional explicit water molecules, obtained using the M11L<sup>1</sup> functional.<sup>a</sup>

| <b>4-chloro-3-nitro</b>      | <b>O<sub>nuc</sub></b> | <b>S</b> | <b>O<sub>lg</sub></b> |
|------------------------------|------------------------|----------|-----------------------|
| RS                           | -1.217712              | 1.25397  | -0.383196             |
| TS                           | -0.770574              | 1.310195 | -0.37252              |
| PS                           | -0.563039              | 1.160276 | -0.788853             |
| <b>4-nitro</b>               | <b>O<sub>nuc</sub></b> | <b>S</b> | <b>O<sub>lg</sub></b> |
| RS                           | -1.195468              | 0.879597 | -0.324804             |
| TS                           | -0.809259              | 1.14282  | -0.477867             |
| PS                           | -0.352874              | 0.977358 | -0.666439             |
| <b>2,6-difluoro</b>          | <b>O<sub>nuc</sub></b> | <b>S</b> | <b>O<sub>lg</sub></b> |
| RS                           | -1.120235              | 0.957035 | -0.214598             |
| TS                           | -0.720382              | 1.157698 | -0.205206             |
| PS                           | -0.550149              | 0.895955 | -0.64519              |
| <b>2-fluoro-4-nitro</b>      | <b>O<sub>nuc</sub></b> | <b>S</b> | <b>O<sub>lg</sub></b> |
| RS                           | -1.121165              | 1.002055 | -0.311068             |
| TS                           | -0.850967              | 1.064396 | -0.333301             |
| PS                           | -0.563774              | 1.009113 | -0.528711             |
| <b>2,3,4,5,6-pentafluoro</b> | <b>O<sub>nuc</sub></b> | <b>S</b> | <b>O<sub>lg</sub></b> |
| RS                           | -1.038878              | 0.917971 | -0.202779             |
| TS                           | -0.688973              | 0.802573 | 0.075625              |
| PS                           | -0.467841              | 0.81433  | -0.580926             |
| <b>3-fluoro-4-nitro</b>      | <b>O<sub>nuc</sub></b> | <b>S</b> | <b>O<sub>lg</sub></b> |
| RS                           | -1.120558              | 1.31893  | -0.445532             |
| TS                           | -0.822024              | 1.283624 | -0.535008             |
| PS                           | -0.519243              | 1.116256 | -0.766397             |

<sup>a</sup> RS, TS and PS denote the reactant, transition and product states, respectively. Partial charges are calculated using the CHELPG<sup>5</sup> charge calculation scheme, as described in the **Methodology** section.

**Table S78.** Partial charges at key stationary points for the alkaline hydrolysis of substituted sulfate diesters in the presence of 0 additional explicit water molecules (pure implicit solvation), obtained using the M062X<sup>4</sup> functional.<sup>a</sup>

| <b>4-chloro-3-nitro</b>      | <b>O<sub>nuc</sub></b> | <b>S</b> | <b>O<sub>lg</sub></b> |
|------------------------------|------------------------|----------|-----------------------|
| RS                           | -1.278676              | 1.10438  | -0.386967             |
| TS                           | -1.138291              | 1.236014 | -0.564708             |
| PS                           | -0.55209               | 1.113685 | -0.868249             |
| <b>4-nitro</b>               | <b>O<sub>nuc</sub></b> | <b>S</b> | <b>O<sub>lg</sub></b> |
| RS                           | -1.275519              | 1.121414 | -0.387754             |
| TS                           | -1.139127              | 1.250009 | -0.560361             |
| PS                           | -0.558318              | 1.13009  | -0.804851             |
| <b>2,6-difluoro</b>          | <b>O<sub>nuc</sub></b> | <b>S</b> | <b>O<sub>lg</sub></b> |
| RS                           | -1.333103              | 1.171004 | -0.332848             |
| TS                           | -1.136644              | 1.210623 | -0.464085             |
| PS                           | -0.535889              | 1.121027 | -0.799473             |
| <b>2-fluoro-4-nitro</b>      | <b>O<sub>nuc</sub></b> | <b>S</b> | <b>O<sub>lg</sub></b> |
| RS                           | -1.277332              | 1.055781 | -0.330178             |
| TS                           | -1.140526              | 1.206306 | -0.502166             |
| PS                           | -0.541                 | 1.090886 | -0.761832             |
| <b>2,3,4,5,6-pentafluoro</b> | <b>O<sub>nuc</sub></b> | <b>S</b> | <b>O<sub>lg</sub></b> |
| RS                           | -1.302291              | 1.047271 | -0.27546              |
| TS                           | -1.144043              | 1.084718 | -0.393913             |
| PS                           | -0.542495              | 1.094986 | -0.779909             |
| <b>3-fluoro-4-nitro</b>      | <b>O<sub>nuc</sub></b> | <b>S</b> | <b>O<sub>lg</sub></b> |
| RS                           | -1.281241              | 1.083053 | -0.368749             |
| TS                           | -1.142764              | 1.240041 | -0.545671             |
| PS                           | -0.550723              | 1.110838 | -0.79328              |

<sup>a</sup> RS, TS and PS denote the reactant, transition and product states, respectively. Partial charges are calculated using the CHELPG<sup>5</sup> charge calculation scheme, as described in the **Methodology** section.

**Table S79.** Partial charges at key stationary points for the alkaline hydrolysis of substituted sulfate diesters in the presence of 2 additional explicit water molecules, obtained using the M062X<sup>4</sup> functional.<sup>a</sup>

| <b>4-chloro-3-nitro</b>      | <b>O<sub>nuc</sub></b> | <b>S</b> | <b>O<sub>lg</sub></b> |
|------------------------------|------------------------|----------|-----------------------|
| RS                           | -1.183837              | 1.149404 | -0.419296             |
| TS                           | -1.049775              | 1.22034  | -0.521161             |
| PS                           | -0.548575              | 1.033961 | -0.855738             |
| <b>4-nitro</b>               | <b>O<sub>nuc</sub></b> | <b>S</b> | <b>O<sub>lg</sub></b> |
| RS                           | -1.174682              | 1.064808 | -0.358528             |
| TS                           | -1.048017              | 1.195557 | -0.504796             |
| PS                           | -0.454976              | 1.055828 | -0.814666             |
| <b>2,6-difluoro</b>          | <b>O<sub>nuc</sub></b> | <b>S</b> | <b>O<sub>lg</sub></b> |
| RS                           | -1.235459              | 1.131061 | -0.32058              |
| TS                           | -1.12217               | 1.205036 | -0.437561             |
| PS                           | -0.5427                | 1.143453 | -0.770924             |
| <b>2-fluoro-4-nitro</b>      | <b>O<sub>nuc</sub></b> | <b>S</b> | <b>O<sub>lg</sub></b> |
| RS                           | -1.177047              | 1.123947 | -0.371349             |
| TS                           | -1.055519              | 1.124415 | -0.423785             |
| PS                           | -0.525182              | 1.072611 | -0.783297             |
| <b>2,3,4,5,6-pentafluoro</b> | <b>O<sub>nuc</sub></b> | <b>S</b> | <b>O<sub>lg</sub></b> |
| RS                           | -1.230799              | 1.026602 | -0.260471             |
| TS                           | -1.159782              | 1.115634 | -0.352506             |
| PS                           | -0.538141              | 1.114017 | -0.737218             |
| <b>3-fluoro-4-nitro</b>      | <b>O<sub>nuc</sub></b> | <b>S</b> | <b>O<sub>lg</sub></b> |
| RS                           | -1.185341              | 1.13244  | -0.384258             |
| TS                           | -1.052143              | 1.212126 | -0.498027             |
| PS                           | -0.545217              | 1.096529 | -0.817359             |

<sup>a</sup> RS, TS and PS denote the reactant, transition and product states, respectively. Partial charges are calculated using the CHELPG<sup>5</sup> charge calculation scheme, as described in the **Methodology** section.

**Table S80.** Partial charges at key stationary points for the alkaline hydrolysis of substituted sulfate diesters in the presence of 4 additional explicit water molecules, obtained using the M062X<sup>4</sup> functional.<sup>a</sup>

| <b>4-chloro-3-nitro</b>      | <b>O<sub>nuc</sub></b> | <b>S</b> | <b>O<sub>lg</sub></b> |
|------------------------------|------------------------|----------|-----------------------|
| RS                           | -1.225708              | 1.027141 | -0.429412             |
| TS                           | -0.950593              | 1.076789 | -0.408504             |
| PS                           | -0.596497              | 1.090874 | -0.847179             |
| <b>4-nitro</b>               | <b>O<sub>nuc</sub></b> | <b>S</b> | <b>O<sub>lg</sub></b> |
| RS                           | -1.238816              | 1.009553 | -0.39931              |
| TS                           | -0.959323              | 1.082878 | -0.417571             |
| PS                           | -0.455648              | 1.027233 | -0.76437              |
| <b>2,6-difluoro</b>          | <b>O<sub>nuc</sub></b> | <b>S</b> | <b>O<sub>lg</sub></b> |
| RS                           | -1.114188              | 0.938976 | -0.195632             |
| TS                           | -1.002794              | 1.001605 | -0.285461             |
| PS                           | -0.599429              | 1.001954 | -0.704403             |
| <b>2-fluoro-4-nitro</b>      | <b>O<sub>nuc</sub></b> | <b>S</b> | <b>O<sub>lg</sub></b> |
| RS                           | -1.110392              | 0.977804 | -0.252159             |
| TS                           | -0.989268              | 0.998185 | -0.323282             |
| PS                           | -0.616365              | 1.168065 | -0.781993             |
| <b>2,3,4,5,6-pentafluoro</b> | <b>O<sub>nuc</sub></b> | <b>S</b> | <b>O<sub>lg</sub></b> |
| RS                           | -1.134079              | 1.010442 | 0.018025              |
| TS                           | -1.004115              | 1.026607 | 0.042262              |
| PS                           | -0.511334              | 1.016364 | -0.580361             |
| <b>3-fluoro-4-nitro</b>      | <b>O<sub>nuc</sub></b> | <b>S</b> | <b>O<sub>lg</sub></b> |
| RS                           | -1.189591              | 0.934662 | -0.309007             |
| TS                           | -1.0353                | 1.000186 | -0.418766             |
| PS                           | -0.483169              | 1.016664 | -0.752615             |

<sup>a</sup> RS, TS and PS denote the reactant, transition and product states, respectively. Partial charges are calculated using the CHELPG<sup>5</sup> charge calculation scheme, as described in the **Methodology** section.

**Table S81.** Partial charges at key stationary points for the alkaline hydrolysis of substituted sulfate diesters in the presence of 8 additional explicit water molecules, obtained using the M062X<sup>4</sup> functional.<sup>a</sup>

| <b>4-chloro-3-nitro</b>      | <b>O<sub>nuc</sub></b> | <b>S</b> | <b>O<sub>lg</sub></b> |
|------------------------------|------------------------|----------|-----------------------|
| RS                           | -1.026154              | 1.294638 | -0.404148             |
| TS                           | -0.94733               | 1.313362 | -0.498923             |
| PS                           | -0.604425              | 0.917057 | -0.82233              |
| <b>4-nitro</b>               | <b>O<sub>nuc</sub></b> | <b>S</b> | <b>O<sub>lg</sub></b> |
| RS                           | -0.964724              | 1.12928  | -0.397992             |
| TS                           | -0.854524              | 1.254148 | -0.535374             |
| PS                           | -0.621103              | 1.146464 | -0.805452             |
| <b>2,6-difluoro</b>          | <b>O<sub>nuc</sub></b> | <b>S</b> | <b>O<sub>lg</sub></b> |
| RS                           | -0.881376              | 0.889385 | -0.252883             |
| TS                           | -0.825784              | 1.061389 | -0.11393              |
| PS                           | -0.556304              | 1.08863  | -0.587597             |
| <b>2-fluoro-4-nitro</b>      | <b>O<sub>nuc</sub></b> | <b>S</b> | <b>O<sub>lg</sub></b> |
| RS                           | -1.078287              | 1.068172 | -0.322814             |
| TS                           | -0.927407              | 1.060805 | -0.306961             |
| PS                           | -0.607599              | 1.087578 | -0.7628               |
| <b>2,3,4,5,6-pentafluoro</b> | <b>O<sub>nuc</sub></b> | <b>S</b> | <b>O<sub>lg</sub></b> |
| RS                           | -0.724007              | 0.746927 | -0.156613             |
| TS                           | -0.739404              | 0.712602 | -0.238053             |
| PS                           | -0.627537              | 0.998366 | -0.667454             |
| <b>3-fluoro-4-nitro</b>      | <b>O<sub>nuc</sub></b> | <b>S</b> | <b>O<sub>lg</sub></b> |
| RS                           | -1.061803              | 1.267365 | -0.408913             |
| TS                           | -0.789773              | 1.301197 | -0.50345              |
| PS                           | -0.467775              | 0.952009 | -0.77534              |

<sup>a</sup> RS, TS and PS denote the reactant, transition and product states, respectively. Partial charges are calculated using the CHELPG<sup>5</sup> charge calculation scheme, as described in the **Methodology** section.

**Table S82.** Geometries at the transition state for the alkaline hydrolysis of substituted sulfate diesters in the presence of 0 additional explicit water molecules (pure implicit solvation), obtained using the  $\omega$ B97X-D<sup>3</sup> functional.<sup>a</sup>

| Water Molecules       | S-O <sub>nuc</sub> Distance | S-O <sub>lg</sub> Distance | S-O <sub>nuc</sub> BO | S-O <sub>lg</sub> BO |
|-----------------------|-----------------------------|----------------------------|-----------------------|----------------------|
| 4-chloro-3-nitro      | 2.35                        | 1.71                       | 0.2621                | 0.5633               |
| 4-nitro               | 2.35                        | 1.71                       | 0.2639                | 0.5569               |
| 2,6-difluoro          | 2.41                        | 1.70                       | 0.2263                | 0.5636               |
| 2-fluoro-4-nitro      | 2.38                        | 1.72                       | 0.2496                | 0.5467               |
| 2,3,4,5,6-pentafluoro | 2.50                        | 1.70                       | 0.1916                | 0.5556               |
| 3-fluoro-4-nitro      | 2.38                        | 1.71                       | 0.2529                | 0.552                |

<sup>a</sup> Bond distances are shown in Å. Bond orders (BO) were calculated based on the Wiberg bond index<sup>7</sup> using natural bond orbital (NBO) analysis.<sup>8</sup>

**Table S83.** Geometries at the transition state for the alkaline hydrolysis of substituted sulfate diesters in the presence of 2 additional explicit water molecules, obtained using the  $\omega$ B97X-D<sup>3</sup> functional.<sup>a</sup>

| Water Molecules       | S-O <sub>nuc</sub> Distance | S-O <sub>lg</sub> Distance | S-O <sub>nuc</sub> BO | S-O <sub>lg</sub> BO |
|-----------------------|-----------------------------|----------------------------|-----------------------|----------------------|
| 4-chloro-3-nitro      | 2.32                        | 1.72                       | 0.2476                | 0.549                |
| 4-nitro               | 2.32                        | 1.72                       | 0.2456                | 0.5485               |
| 2,6-difluoro          | 2.38                        | 1.71                       | 0.2188                | 0.5496               |
| 2-fluoro-4-nitro      | 2.35                        | 1.72                       | 0.2335                | 0.5353               |
| 2,3,4,5,6-pentafluoro | 2.44                        | 1.72                       | 0.2005                | 0.5381               |
| 3-fluoro-4-nitro      | 2.34                        | 1.72                       | 0.2381                | 0.5415               |

<sup>a</sup> Bond distances are shown in Å. Bond orders (BO) were calculated based on the Wiberg bond index<sup>7</sup> using natural bond orbital (NBO) analysis.<sup>8</sup>



**Table S84.** Geometries at the transition state for the alkaline hydrolysis of substituted sulfate diesters in the presence of 4 additional explicit water molecules, obtained using the  $\omega$ B97X-D<sup>3</sup> functional.<sup>a</sup>

| Water Molecules       | S-O <sub>nuc</sub> Distance | S-O <sub>lg</sub> Distance | S-O <sub>nuc</sub> BO | S-O <sub>lg</sub> BO |
|-----------------------|-----------------------------|----------------------------|-----------------------|----------------------|
| 4-chloro-3-nitro      | 2.31                        | 1.73                       | 0.2211                | 0.5312               |
| 4-nitro               | 2.30                        | 1.73                       | 0.2242                | 0.5336               |
| 2,6-difluoro          | 2.34                        | 1.72                       | 0.2088                | 0.551                |
| 2-fluoro-4-nitro      | 2.36                        | 1.71                       | 0.2039                | 0.5515               |
| 2,3,4,5,6-pentafluoro | 2.42                        | 1.73                       | 0.1772                | 0.5216               |
| 3-fluoro-4-nitro      | 2.30                        | 1.72                       | 0.226                 | 0.5462               |

<sup>a</sup> Bond distances are shown in Å. Bond orders (BO) were calculated based on the Wiberg bond index<sup>7</sup> using natural bond orbital (NBO) analysis.<sup>8</sup>

**Table S85.** Geometries at the transition state for the alkaline hydrolysis of substituted sulfate diesters in the presence of 8 additional explicit water molecules, obtained using the  $\omega$ B97X-D<sup>3</sup> functional.<sup>a</sup>

| Water Molecules       | S-O <sub>nuc</sub> Distance | S-O <sub>lg</sub> Distance | S-O <sub>nuc</sub> BO | S-O <sub>lg</sub> BO |
|-----------------------|-----------------------------|----------------------------|-----------------------|----------------------|
| 4-chloro-3-nitro      | 2.26                        | 1.73                       | 0.2475                | 0.5495               |
| 4-nitro               | 2.26                        | 1.73                       | 0.2506                | 0.5523               |
| 2,6-difluoro          | 2.29                        | 1.73                       | 0.2207                | 0.5456               |
| 2-fluoro-4-nitro      | 2.31                        | 1.73                       | 0.2264                | 0.5356               |
| 2,3,4,5,6-pentafluoro | 2.33                        | 1.74                       | 0.207                 | 0.5322               |
| 3-fluoro-4-nitro      | 2.26                        | 1.7                        | 0.2464                | 0.5856               |

<sup>a</sup> Bond distances are shown in Å. Bond orders (BO) were calculated based on the Wiberg bond index<sup>7</sup> using natural bond orbital (NBO) analysis.<sup>8</sup>

**Table S86.** Geometries at the transition state for the alkaline hydrolysis of substituted sulfate diesters in the presence of 0 additional explicit water molecules (pure implicit solvation), obtained using the M11L<sup>1</sup> functional.<sup>a</sup>

| <b>Water Molecules</b> | <b>S-O<sub>nuc</sub> Distance</b> | <b>S-O<sub>lg</sub> Distance</b> | <b>S-O<sub>nuc</sub> BO</b> | <b>S-O<sub>lg</sub> BO</b> |
|------------------------|-----------------------------------|----------------------------------|-----------------------------|----------------------------|
| 4-chloro-3-nitro       | 2.31                              | 1.69                             | 0.2428                      | 0.5515                     |
| 4-nitro                | 2.31                              | 1.70                             | 0.2543                      | 0.532                      |
| 2,6-difluoro           | 2.35                              | 1.68                             | 0.2196                      | 0.554                      |
| 2-fluoro-4-nitro       | 2.34                              | 1.70                             | 0.2327                      | 0.5274                     |
| 2,3,4,5,6-pentafluoro  | 2.41                              | 1.68                             | 0.193                       | 0.5462                     |
| 3-fluoro-4-nitro       | 2.33                              | 1.70                             | 0.2408                      | 0.5268                     |

<sup>a</sup> Bond distances are shown in Å. Bond orders (BO) were calculated based on the Wiberg bond index<sup>7</sup> using natural bond orbital (NBO) analysis.<sup>8</sup>

**Table S87.** Geometries at the transition state for the alkaline hydrolysis of substituted sulfate diesters in the presence of 2 additional explicit water molecules, obtained using the M11L<sup>1</sup> functional.<sup>a</sup>

| <b>Water Molecules</b> | <b>S-O<sub>nuc</sub> Distance</b> | <b>S-O<sub>lg</sub> Distance</b> | <b>S-O<sub>nuc</sub> BO</b> | <b>S-O<sub>lg</sub> BO</b> |
|------------------------|-----------------------------------|----------------------------------|-----------------------------|----------------------------|
| 4-chloro-3-nitro       | 2.29                              | 1.70                             | 0.2466                      | 0.536                      |
| 4-nitro                | 2.30                              | 1.70                             | 0.2412                      | 0.5261                     |
| 2,6-difluoro           | 2.32                              | 1.69                             | 0.2294                      | 0.5407                     |
| 2-fluoro-4-nitro       | 2.32                              | 1.71                             | 0.231                       | 0.5176                     |
| 2,3,4,5,6-pentafluoro  | 2.37                              | 1.69                             | 0.2087                      | 0.5316                     |
| 3-fluoro-4-nitro       | 2.31                              | 1.71                             | 0.2377                      | 0.5171                     |

<sup>a</sup> Bond distances are shown in Å. Bond orders (BO) were calculated based on the Wiberg bond index<sup>7</sup> using natural bond orbital (NBO) analysis.<sup>8</sup>

**Table S88.** Geometries at the transition state for the alkaline hydrolysis of substituted sulfate diesters in the presence of 4 additional explicit water molecules, obtained using the M11L<sup>1</sup> functional.<sup>a</sup>

| Water Molecules       | S-O <sub>nuc</sub> Distance | S-O <sub>lg</sub> Distance | S-O <sub>nuc</sub> BO | S-O <sub>lg</sub> BO |
|-----------------------|-----------------------------|----------------------------|-----------------------|----------------------|
| 4-chloro-3-nitro      | 2.26                        | 1.71                       | 0.2249                | 0.5191               |
| 4-nitro               | 2.26                        | 1.71                       | 0.2234                | 0.5166               |
| 2,6-difluoro          | 2.28                        | 1.69                       | 0.2208                | 0.5397               |
| 2-fluoro-4-nitro      | 2.31                        | 1.69                       | 0.2116                | 0.5347               |
| 2,3,4,5,6-pentafluoro | 2.34                        | 1.70                       | 0.1947                | 0.5122               |
| 3-fluoro-4-nitro      | 2.29                        | 1.71                       | 0.2175                | 0.5171               |

<sup>a</sup> Bond distances are shown in Å. Bond orders (BO) were calculated based on the Wiberg bond index<sup>7</sup> using natural bond orbital (NBO) analysis.<sup>8</sup>

**Table S89.** Geometries at the transition state for the alkaline hydrolysis of substituted sulfate diesters in the presence of 8 additional explicit water molecules, obtained using the M11L<sup>1</sup> functional.<sup>a</sup>

| Water Molecules       | S-O <sub>nuc</sub> Distance | S-O <sub>lg</sub> Distance | S-O <sub>nuc</sub> BO | S-O <sub>lg</sub> BO |
|-----------------------|-----------------------------|----------------------------|-----------------------|----------------------|
| 4-chloro-3-nitro      | 2.22                        | 1.72                       | 0.2459                | 0.5249               |
| 4-nitro               | 2.22                        | 1.72                       | 0.2432                | 0.5151               |
| 2,6-difluoro          | 2.23                        | 1.71                       | 0.2311                | 0.5246               |
| 2-fluoro-4-nitro      | 2.26                        | 1.71                       | 0.2314                | 0.5172               |
| 2,3,4,5,6-pentafluoro | 2.25                        | 1.72                       | 0.2213                | 0.513                |
| 3-fluoro-4-nitro      | 2.23                        | 1.71                       | 0.2377                | 0.54                 |

<sup>a</sup> Bond distances are shown in Å. Bond orders (BO) were calculated based on the Wiberg bond index<sup>7</sup> using natural bond orbital (NBO) analysis.<sup>8</sup>

**Table S90.** Geometries at the transition state for the alkaline hydrolysis of substituted sulfate diesters in the presence of 0 additional explicit water molecules (pure implicit solvation), obtained using the M062X<sup>4</sup> functional.<sup>a</sup>

| Water Molecules       | S-O <sub>nuc</sub> Distance | S-O <sub>lg</sub> Distance | S-O <sub>nuc</sub> BO | S-O <sub>lg</sub> BO |
|-----------------------|-----------------------------|----------------------------|-----------------------|----------------------|
| 4-chloro-3-nitro      | 2.39                        | 1.69                       | 0.2314                | 0.5774               |
| 4-nitro               | 2.39                        | 1.69                       | 0.2306                | 0.5775               |
| 2,6-difluoro          | 2.44                        | 1.69                       | 0.196                 | 0.5769               |
| 2-fluoro-4-nitro      | 2.41                        | 1.69                       | 0.2203                | 0.5659               |
| 2,3,4,5,6-pentafluoro | 2.47                        | 1.70                       | 0.1949                | 0.5604               |
| 3-fluoro-4-nitro      | 2.40                        | 1.69                       | 0.2266                | 0.5701               |

<sup>a</sup> Bond distances are shown in Å. Bond orders (BO) were calculated based on the Wiberg bond index<sup>7</sup> using natural bond orbital (NBO) analysis.<sup>8</sup>

**Table S91.** Geometries at the transition state for the alkaline hydrolysis of substituted sulfate diesters in the presence of 2 additional explicit water molecules, obtained using the M062X<sup>4</sup> functional.<sup>a</sup>

| Water Molecules       | S-O <sub>nuc</sub> Distance | S-O <sub>lg</sub> Distance | S-O <sub>nuc</sub> BO | S-O <sub>lg</sub> BO |
|-----------------------|-----------------------------|----------------------------|-----------------------|----------------------|
| 4-chloro-3-nitro      | 2.35                        | 1.70                       | 0.2195                | 0.5732               |
| 4-nitro               | 2.35                        | 1.70                       | 0.2173                | 0.5692               |
| 2,6-difluoro          | 2.40                        | 1.69                       | 0.2047                | 0.577                |
| 2-fluoro-4-nitro      | 2.38                        | 1.70                       | 0.2041                | 0.5583               |
| 2,3,4,5,6-pentafluoro | 2.45                        | 1.69                       | 0.1841                | 0.5703               |
| 3-fluoro-4-nitro      | 2.36                        | 1.70                       | 0.2125                | 0.5659               |

<sup>a</sup> Bond distances are shown in Å. Bond orders (BO) were calculated based on the Wiberg bond index<sup>7</sup> using natural bond orbital (NBO) analysis.<sup>8</sup>

**Table S92.** Geometries at the transition state for the alkaline hydrolysis of substituted sulfate diesters in the presence of 4 additional explicit water molecules, obtained using the M062X<sup>4</sup> functional.<sup>a</sup>

| Water Molecules       | S-O <sub>nuc</sub> Distance | S-O <sub>lg</sub> Distance | S-O <sub>nuc</sub> BO | S-O <sub>lg</sub> BO |
|-----------------------|-----------------------------|----------------------------|-----------------------|----------------------|
| 4-chloro-3-nitro      | 2.33                        | 1.71                       | 0.1936                | 0.553                |
| 4-nitro               | 2.31                        | 1.71                       | 0.2027                | 0.5577               |
| 2,6-difluoro          | 2.36                        | 1.70                       | 0.1882                | 0.5676               |
| 2-fluoro-4-nitro      | 2.37                        | 1.69                       | 0.1855                | 0.5679               |
| 2,3,4,5,6-pentafluoro | 2.42                        | 1.71                       | 0.1609                | 0.5367               |
| 3-fluoro-4-nitro      | 2.33                        | 1.70                       | 0.1979                | 0.5643               |

<sup>a</sup> Bond distances are shown in Å. Bond orders (BO) were calculated based on the Wiberg bond index<sup>7</sup> using natural bond orbital (NBO) analysis.<sup>8</sup>

**Table S93.** Geometries at the transition state for the alkaline hydrolysis of substituted sulfate diesters in the presence of 8 additional explicit water molecules, obtained using the M062X<sup>4</sup> functional.<sup>a</sup>

| Water Molecules       | S-O <sub>nuc</sub> Distance | S-O <sub>lg</sub> Distance | S-O <sub>nuc</sub> BO | S-O <sub>lg</sub> BO |
|-----------------------|-----------------------------|----------------------------|-----------------------|----------------------|
| 4-chloro-3-nitro      | 2.29                        | 1.69                       | 0.2281                | 0.5897               |
| 4-nitro               | 2.26                        | 1.7                        | 0.2308                | 0.5915               |
| 2,6-difluoro          | 2.32                        | 1.70                       | 0.1921                | 0.5599               |
| 2-fluoro-4-nitro      | 2.35                        | 1.7                        | 0.1936                | 0.5551               |
| 2,3,4,5,6-pentafluoro | 2.34                        | 1.71                       | 0.1888                | 0.5625               |
| 3-fluoro-4-nitro      | 2.26                        | 1.7                        | 0.2228                | 0.5915               |

<sup>a</sup> Bond distances are shown in Å. Bond orders (BO) were calculated based on the Wiberg bond index<sup>7</sup> using natural bond orbital (NBO) analysis.<sup>8</sup>

**Table S94.** Geometries at key stationary points for the alkaline hydrolysis of substituted sulfate diesters in the presence of 0 additional explicit water molecules (pure implicit solvation), obtained using the  $\omega$ B97X-D<sup>3</sup> functional.<sup>a</sup>

| <b>4-chloro-3-nitro</b>      | <b>S-O<sub>nuc</sub> Distance</b> | <b>S-O<sub>lg</sub> Distance</b> | <b>S-O<sub>nuc</sub> BO</b> | <b>S-O<sub>lg</sub> BO</b> |
|------------------------------|-----------------------------------|----------------------------------|-----------------------------|----------------------------|
| RS                           | 4.04                              | 1.62                             | 0.0037                      | 0.6738                     |
| TS                           | 2.35                              | 1.71                             | 0.2621                      | 0.5633                     |
| PS                           | 1.59                              | 5.96                             | 0.763                       | 0.0001                     |
| <b>4-nitro</b>               | <b>S-O<sub>nuc</sub> Distance</b> | <b>S-O<sub>lg</sub> Distance</b> | <b>S-O<sub>nuc</sub> BO</b> | <b>S-O<sub>lg</sub> BO</b> |
| RS                           | 3.87                              | 1.61                             | 0.0059                      | 0.6746                     |
| TS                           | 2.35                              | 1.71                             | 0.2639                      | 0.5569                     |
| PS                           | 1.59                              | 3.99                             | 0.7569                      | 0.0007                     |
| <b>2,6-difluoro</b>          | <b>S-O<sub>nuc</sub> Distance</b> | <b>S-O<sub>lg</sub> Distance</b> | <b>S-O<sub>nuc</sub> BO</b> | <b>S-O<sub>lg</sub> BO</b> |
| RS                           | 4.70                              | 1.62                             | 0.0032                      | 0.6669                     |
| TS                           | 2.41                              | 1.70                             | 0.2263                      | 0.5636                     |
| PS                           | 1.59                              | 4.62                             | 0.7485                      | 0.0005                     |
| <b>2-fluoro-4-nitro</b>      | <b>S-O<sub>nuc</sub> Distance</b> | <b>S-O<sub>lg</sub> Distance</b> | <b>S-O<sub>nuc</sub> BO</b> | <b>S-O<sub>lg</sub> BO</b> |
| RS                           | 3.90                              | 1.62                             | 0.0059                      | 0.66                       |
| TS                           | 2.38                              | 1.72                             | 0.2496                      | 0.5467                     |
| PS                           | 1.59                              | 4.10                             | 0.7539                      | 0.0006                     |
| <b>2,3,4,5,6-pentafluoro</b> | <b>S-O<sub>nuc</sub> Distance</b> | <b>S-O<sub>lg</sub> Distance</b> | <b>S-O<sub>nuc</sub> BO</b> | <b>S-O<sub>lg</sub> BO</b> |
| RS                           | 4.26                              | 1.63                             | 0.0036                      | 0.6431                     |
| TS                           | 2.50                              | 1.70                             | 0.1916                      | 0.5556                     |
| PS                           | 1.59                              | 4.95                             | 0.7576                      | 0.0003                     |
| <b>3-fluoro-4-nitro</b>      | <b>S-O<sub>nuc</sub> Distance</b> | <b>S-O<sub>lg</sub> Distance</b> | <b>S-O<sub>nuc</sub> BO</b> | <b>S-O<sub>lg</sub> BO</b> |
| RS                           | 3.87                              | 1.62                             | 0.0059                      | 0.666                      |
| TS                           | 2.38                              | 1.71                             | 0.2529                      | 0.552                      |
| PS                           | 1.59                              | 4.18                             | 0.7542                      | 0.0005                     |

<sup>a</sup> RS, TS and PS denote the reactant, transition and product states, respectively. Bond distances are shown in Å. Bond orders (BO) were calculated based on the Wiberg bond index<sup>7</sup> using natural bond orbital (NBO) analysis.<sup>8</sup>

**Table S95.** Geometries at key stationary points for the alkaline hydrolysis of substituted sulfate diesters in the presence of 2 additional explicit water molecules, obtained using the  $\omega$ B97X-D<sup>3</sup> functional.<sup>a</sup>

| <b>4-chloro-3-nitro</b>      | <b>S-O<sub>nuc</sub> Distance</b> | <b>S-O<sub>lg</sub> Distance</b> | <b>S-O<sub>nuc</sub> BO</b> | <b>S-O<sub>lg</sub> BO</b> |
|------------------------------|-----------------------------------|----------------------------------|-----------------------------|----------------------------|
| RS                           | 4.58                              | 1.62                             | 0.0016                      | 0.676                      |
| TS                           | 2.32                              | 1.72                             | 0.2476                      | 0.549                      |
| PS                           | 1.59                              | 4.62                             | 0.7432                      | 0.0002                     |
| <b>4-nitro</b>               | <b>S-O<sub>nuc</sub> Distance</b> | <b>S-O<sub>lg</sub> Distance</b> | <b>S-O<sub>nuc</sub> BO</b> | <b>S-O<sub>lg</sub> BO</b> |
| RS                           | 4.62                              | 1.61                             | 0.0013                      | 0.7122                     |
| TS                           | 2.32                              | 1.72                             | 0.2456                      | 0.5485                     |
| PS                           | 1.59                              | 4.72                             | 0.7438                      | 0.0002                     |
| <b>2,6-difluoro</b>          | <b>S-O<sub>nuc</sub> Distance</b> | <b>S-O<sub>lg</sub> Distance</b> | <b>S-O<sub>nuc</sub> BO</b> | <b>S-O<sub>lg</sub> BO</b> |
| RS                           | 3.48                              | 1.62                             | 0.0097                      | 0.6722                     |
| TS                           | 2.35                              | 1.70                             | 0.2195                      | 0.5732                     |
| PS                           | 1.59                              | 3.42                             | 0.7332                      | 0.0037                     |
| <b>2-fluoro-4-nitro</b>      | <b>S-O<sub>nuc</sub> Distance</b> | <b>S-O<sub>lg</sub> Distance</b> | <b>S-O<sub>nuc</sub> BO</b> | <b>S-O<sub>lg</sub> BO</b> |
| RS                           | 4.60                              | 1.62                             | 0.0017                      | 0.6573                     |
| TS                           | 2.35                              | 1.72                             | 0.2335                      | 0.5353                     |
| PS                           | 1.59                              | 4.72                             | 0.7458                      | 0.0002                     |
| <b>2,3,4,5,6-pentafluoro</b> | <b>S-O<sub>nuc</sub> Distance</b> | <b>S-O<sub>lg</sub> Distance</b> | <b>S-O<sub>nuc</sub> BO</b> | <b>S-O<sub>lg</sub> BO</b> |
| RS                           | 3.88                              | 1.64                             | 0.0066                      | 0.631                      |
| TS                           | 2.44                              | 1.72                             | 0.2005                      | 0.5381                     |
| PS                           | 1.59                              | 4.65                             | 0.7496                      | 0.0002                     |
| <b>3-fluoro-4-nitro</b>      | <b>S-O<sub>nuc</sub> Distance</b> | <b>S-O<sub>lg</sub> Distance</b> | <b>S-O<sub>nuc</sub> BO</b> | <b>S-O<sub>lg</sub> BO</b> |
| RS                           | 4.62                              | 1.62                             | 0.0017                      | 0.6655                     |
| TS                           | 2.34                              | 1.72                             | 0.2381                      | 0.5415                     |
| PS                           | 1.59                              | 3.88                             | 0.7551                      | 0.0008                     |

<sup>a</sup> RS, TS and PS denote the reactant, transition and product states, respectively. Bond distances are shown in Å. Bond orders (BO) were calculated based on the Wiberg bond index<sup>7</sup> using natural bond orbital (NBO) analysis.<sup>8</sup>

**Table S96.** Geometries at key stationary points for the alkaline hydrolysis of substituted sulfate diesters in the presence of 4 additional explicit water molecules, obtained using the  $\omega$ B97X-D<sup>3</sup> functional.<sup>a</sup>

| <b>4-chloro-3-nitro</b>      | <b>S-O<sub>nuc</sub> Distance</b> | <b>S-O<sub>lg</sub> Distance</b> | <b>S-O<sub>nuc</sub> BO</b> | <b>S-O<sub>lg</sub> BO</b> |
|------------------------------|-----------------------------------|----------------------------------|-----------------------------|----------------------------|
| RS                           | 4.67                              | 1.61                             | 0.0004                      | 0.6712                     |
| TS                           | 2.31                              | 1.73                             | 0.2211                      | 0.5312                     |
| PS                           | 1.55                              | 4.41                             | 0.8323                      | 0.0003                     |
| <b>4-nitro</b>               | <b>S-O<sub>nuc</sub> Distance</b> | <b>S-O<sub>lg</sub> Distance</b> | <b>S-O<sub>nuc</sub> BO</b> | <b>S-O<sub>lg</sub> BO</b> |
| RS                           | 4.39                              | 1.61                             | 0.0003                      | 0.6907                     |
| TS                           | 2.30                              | 1.73                             | 0.2242                      | 0.5336                     |
| PS                           | 1.45                              | 1.59                             | 0.7446                      | 0.0008                     |
| <b>2,6-difluoro</b>          | <b>S-O<sub>nuc</sub> Distance</b> | <b>S-O<sub>lg</sub> Distance</b> | <b>S-O<sub>nuc</sub> BO</b> | <b>S-O<sub>lg</sub> BO</b> |
| RS                           | 3.80                              | 1.63                             | 0.0055                      | 0.6457                     |
| TS                           | 2.34                              | 1.72                             | 0.2088                      | 0.551                      |
| PS                           | 1.56                              | 4.56                             | 0.8262                      | 0.0003                     |
| <b>2-fluoro-4-nitro</b>      | <b>S-O<sub>nuc</sub> Distance</b> | <b>S-O<sub>lg</sub> Distance</b> | <b>S-O<sub>nuc</sub> BO</b> | <b>S-O<sub>lg</sub> BO</b> |
| RS                           | 3.69                              | 1.63                             | 0.0077                      | 0.6427                     |
| TS                           | 2.36                              | 1.71                             | 0.2039                      | 0.5515                     |
| PS                           | 1.56                              | 4.67                             | 0.8203                      | 0.0002                     |
| <b>2,3,4,5,6-pentafluoro</b> | <b>S-O<sub>nuc</sub> Distance</b> | <b>S-O<sub>lg</sub> Distance</b> | <b>S-O<sub>nuc</sub> BO</b> | <b>S-O<sub>lg</sub> BO</b> |
| RS                           | 3.72                              | 1.64                             | 0.0072                      | 0.6151                     |
| TS                           | 2.42                              | 1.73                             | 0.1772                      | 0.5216                     |
| PS                           | 3.72                              | 1.64                             | 0.0072                      | 0.6151                     |
| <b>3-fluoro-4-nitro</b>      | <b>S-O<sub>nuc</sub> Distance</b> | <b>S-O<sub>lg</sub> Distance</b> | <b>S-O<sub>nuc</sub> BO</b> | <b>S-O<sub>lg</sub> BO</b> |
| RS                           | 4.68                              | 1.62                             | 0.0005                      | 0.6722                     |
| TS                           | 2.30                              | 1.72                             | 0.226                       | 0.5462                     |
| PS                           | 1.48                              | 4.73                             | 1.0626                      | 0.0001                     |

<sup>a</sup> RS, TS and PS denote the reactant, transition and product states, respectively. Bond distances are shown in Å. Bond orders (BO) were calculated based on the Wiberg bond index<sup>7</sup> using natural bond orbital (NBO) analysis.<sup>8</sup>



**Table S97.** Geometries at key stationary points for the alkaline hydrolysis of substituted sulfate diesters in the presence of 8 additional explicit water molecules, obtained using the  $\omega$ B97X-D<sup>3</sup> functional.<sup>a</sup>

| <b>4-chloro-3-nitro</b>      | <b>S-O<sub>nuc</sub> Distance</b> | <b>S-O<sub>lg</sub> Distance</b> | <b>S-O<sub>nuc</sub> BO</b> | <b>S-O<sub>lg</sub> BO</b> |
|------------------------------|-----------------------------------|----------------------------------|-----------------------------|----------------------------|
| RS                           | 4.41                              | 1.61                             | 0.0005                      | 0.6994                     |
| TS                           | 2.26                              | 1.73                             | 0.2475                      | 0.5495                     |
| PS                           | 1.59                              | 4.54                             | 0.7378                      | 0.0003                     |
| <b>4-nitro</b>               | <b>S-O<sub>nuc</sub> Distance</b> | <b>S-O<sub>lg</sub> Distance</b> | <b>S-O<sub>nuc</sub> BO</b> | <b>S-O<sub>lg</sub> BO</b> |
| RS                           | 5.08                              | 1.60                             | 0.0004                      | 0.719                      |
| TS                           | 2.26                              | 1.73                             | 0.2506                      | 0.5523                     |
| PS                           | 1.48                              | 4.40                             | 1.0432                      | 0.0006                     |
| <b>2,6-difluoro</b>          | <b>S-O<sub>nuc</sub> Distance</b> | <b>S-O<sub>lg</sub> Distance</b> | <b>S-O<sub>nuc</sub> BO</b> | <b>S-O<sub>lg</sub> BO</b> |
| RS                           | 5.63                              | 1.61                             | 0.0001                      | 0.6893                     |
| TS                           | 2.29                              | 1.73                             | 0.2207                      | 0.5456                     |
| PS                           | 1.58                              | 4.6                              | 0.768                       | 0.0003                     |
| <b>2-fluoro-4-nitro</b>      | <b>S-O<sub>nuc</sub> Distance</b> | <b>S-O<sub>lg</sub> Distance</b> | <b>S-O<sub>nuc</sub> BO</b> | <b>S-O<sub>lg</sub> BO</b> |
| RS                           | 5.21                              | 1.62                             | 0.0002                      | 0.6765                     |
| TS                           | 2.31                              | 1.73                             | 0.2264                      | 0.5356                     |
| PS                           | 1.59                              | 3.52                             | 0.7492                      | 0.0021                     |
| <b>2,3,4,5,6-pentafluoro</b> | <b>S-O<sub>nuc</sub> Distance</b> | <b>S-O<sub>lg</sub> Distance</b> | <b>S-O<sub>nuc</sub> BO</b> | <b>S-O<sub>lg</sub> BO</b> |
| RS                           | 4.57                              | 1.63                             | 0.0006                      | 0.6744                     |
| TS                           | 2.33                              | 1.74                             | 0.207                       | 0.5322                     |
| PS                           | 1.47                              | 5.5                              | 1.1459                      | 0.0001                     |
| <b>3-fluoro-4-nitro</b>      | <b>S-O<sub>nuc</sub> Distance</b> | <b>S-O<sub>lg</sub> Distance</b> | <b>S-O<sub>nuc</sub> BO</b> | <b>S-O<sub>lg</sub> BO</b> |
| RS                           | 4.29                              | 1.61                             | 0.0005                      | 0.6863                     |
| TS                           | 2.26                              | 1.7                              | 0.2464                      | 0.5856                     |
| PS                           | 1.49                              | 5.06                             | 1.0854                      | 0.0011                     |

<sup>a</sup> RS, TS and PS denote the reactant, transition and product states, respectively. Bond distances are shown in Å. Bond orders (BO) were calculated based on the Wiberg bond index<sup>7</sup> using natural bond orbital (NBO) analysis.<sup>8</sup>

**Table S98.** Geometries at key stationary points for the alkaline hydrolysis of substituted sulfate diesters in the presence of 0 additional explicit water molecules (pure implicit solvation), obtained using the M11L<sup>1</sup> functional.<sup>a</sup>

| <b>4-chloro-3-nitro</b>      | <b>S-O<sub>nuc</sub> Distance</b> | <b>S-O<sub>lg</sub> Distance</b> | <b>S-O<sub>nuc</sub> BO</b> | <b>S-O<sub>lg</sub> BO</b> |
|------------------------------|-----------------------------------|----------------------------------|-----------------------------|----------------------------|
| RS                           | 3.76                              | 1.59                             | 0.0032                      | 0.6809                     |
| TS                           | 2.31                              | 1.69                             | 0.2428                      | 0.5515                     |
| PS                           | 1.56                              | 3.77                             | 0.7547                      | 0.0017                     |
| <b>4-nitro</b>               | <b>S-O<sub>nuc</sub> Distance</b> | <b>S-O<sub>lg</sub> Distance</b> | <b>S-O<sub>nuc</sub> BO</b> | <b>S-O<sub>lg</sub> BO</b> |
| RS                           | 3.79                              | 1.59                             | 0.0027                      | 0.6817                     |
| TS                           | 2.31                              | 1.70                             | 0.2543                      | 0.532                      |
| PS                           | 1.56                              | 4.09                             | 0.7523                      | 0.0012                     |
| <b>2,6-difluoro</b>          | <b>S-O<sub>nuc</sub> Distance</b> | <b>S-O<sub>lg</sub> Distance</b> | <b>S-O<sub>nuc</sub> BO</b> | <b>S-O<sub>lg</sub> BO</b> |
| RS                           | 4.39                              | 1.59                             | 0.0012                      | 0.6351                     |
| TS                           | 2.35                              | 1.68                             | 0.2196                      | 0.554                      |
| PS                           | 1.56                              | 3.59                             | 0.7462                      | 0.0022                     |
| <b>2-fluoro-4-nitro</b>      | <b>S-O<sub>nuc</sub> Distance</b> | <b>S-O<sub>lg</sub> Distance</b> | <b>S-O<sub>nuc</sub> BO</b> | <b>S-O<sub>lg</sub> BO</b> |
| RS                           | 3.71                              | 1.60                             | 0.0036                      | 0.6697                     |
| TS                           | 2.34                              | 1.70                             | 0.2327                      | 0.5274                     |
| PS                           | 1.56                              | 3.81                             | 0.757                       | 0.0011                     |
| <b>2,3,4,5,6-pentafluoro</b> | <b>S-O<sub>nuc</sub> Distance</b> | <b>S-O<sub>lg</sub> Distance</b> | <b>S-O<sub>nuc</sub> BO</b> | <b>S-O<sub>lg</sub> BO</b> |
| RS                           | 3.82                              | 1.61                             | 0.0013                      | 0.6044                     |
| TS                           | 2.41                              | 1.68                             | 0.193                       | 0.5462                     |
| PS                           | 1.56                              | 3.76                             | 0.7542                      | 0.0015                     |
| <b>3-fluoro-4-nitro</b>      | <b>S-O<sub>nuc</sub> Distance</b> | <b>S-O<sub>lg</sub> Distance</b> | <b>S-O<sub>nuc</sub> BO</b> | <b>S-O<sub>lg</sub> BO</b> |
| RS                           | 3.77                              | 1.59                             | 0.0026                      | 0.684                      |
| TS                           | 2.33                              | 1.70                             | 0.2408                      | 0.5268                     |
| PS                           | 1.56                              | 3.86                             | 0.7573                      | 0.0011                     |

<sup>a</sup> RS, TS and PS denote the reactant, transition and product states, respectively. Bond distances are shown in Å. Bond orders (BO) were calculated based on the Wiberg bond index<sup>7</sup> using natural bond orbital (NBO) analysis.<sup>8</sup>

**Table S99.** Geometries at key stationary points for the alkaline hydrolysis of substituted sulfate diesters in the presence of 2 additional explicit water molecules, obtained using the M11L<sup>1</sup> functional.<sup>a</sup>

| <b>4-chloro-3-nitro</b>      | <b>S-O<sub>nuc</sub> Distance</b> | <b>S-O<sub>lg</sub> Distance</b> | <b>S-O<sub>nuc</sub> BO</b> | <b>S-O<sub>lg</sub> BO</b> |
|------------------------------|-----------------------------------|----------------------------------|-----------------------------|----------------------------|
| RS                           | 3.76                              | 1.59                             | 0.0048                      | 0.6801                     |
| TS                           | 2.29                              | 1.70                             | 0.2466                      | 0.536                      |
| PS                           | 1.56                              | 3.78                             | 0.7415                      | 0.0018                     |
| <b>4-nitro</b>               | <b>S-O<sub>nuc</sub> Distance</b> | <b>S-O<sub>lg</sub> Distance</b> | <b>S-O<sub>nuc</sub> BO</b> | <b>S-O<sub>lg</sub> BO</b> |
| RS                           | 3.75                              | 1.59                             | 0.0047                      | 0.6768                     |
| TS                           | 2.30                              | 1.70                             | 0.2412                      | 0.5261                     |
| PS                           | 1.56                              | 3.82                             | 0.737                       | 0.0016                     |
| <b>2,6-difluoro</b>          | <b>S-O<sub>nuc</sub> Distance</b> | <b>S-O<sub>lg</sub> Distance</b> | <b>S-O<sub>nuc</sub> BO</b> | <b>S-O<sub>lg</sub> BO</b> |
| RS                           | 4.36                              | 1.59                             | 0.002                       | 0.6482                     |
| TS                           | 2.32                              | 1.69                             | 0.2294                      | 0.5407                     |
| PS                           | 1.56                              | 3.64                             | 0.7284                      | 0.0022                     |
| <b>2-fluoro-4-nitro</b>      | <b>S-O<sub>nuc</sub> Distance</b> | <b>S-O<sub>lg</sub> Distance</b> | <b>S-O<sub>nuc</sub> BO</b> | <b>S-O<sub>lg</sub> BO</b> |
| RS                           | 3.73                              | 1.60                             | 0.0044                      | 0.6678                     |
| TS                           | 2.32                              | 1.71                             | 0.231                       | 0.5176                     |
| PS                           | 1.56                              | 3.83                             | 0.7455                      | 0.0012                     |
| <b>2,3,4,5,6-pentafluoro</b> | <b>S-O<sub>nuc</sub> Distance</b> | <b>S-O<sub>lg</sub> Distance</b> | <b>S-O<sub>nuc</sub> BO</b> | <b>S-O<sub>lg</sub> BO</b> |
| RS                           | 3.71                              | 1.61                             | 0.0119                      | 0.6278                     |
| TS                           | 2.34                              | 1.70                             | 0.1947                      | 0.5122                     |
| PS                           | 1.52                              | 4.63                             | 0.8365                      | 0.0002                     |
| <b>3-fluoro-4-nitro</b>      | <b>S-O<sub>nuc</sub> Distance</b> | <b>S-O<sub>lg</sub> Distance</b> | <b>S-O<sub>nuc</sub> BO</b> | <b>S-O<sub>lg</sub> BO</b> |
| RS                           | 3.72                              | 1.59                             | 0.005                       | 0.6763                     |
| TS                           | 2.31                              | 1.71                             | 0.2377                      | 0.5171                     |
| PS                           | 1.56                              | 3.81                             | 0.7411                      | 0.0018                     |

<sup>a</sup> RS, TS and PS denote the reactant, transition and product states, respectively. Bond distances are shown in Å. Bond orders (BO) were calculated based on the Wiberg bond index<sup>7</sup> using natural bond orbital (NBO) analysis.<sup>8</sup>

**Table S100.** Geometries at key stationary points for the alkaline hydrolysis of substituted sulfate diesters in the presence of 4 additional explicit water molecules, obtained using the M11L<sup>1</sup> functional.<sup>a</sup>

| <b>4-chloro-3-nitro</b>      | <b>S-O<sub>nuc</sub> Distance</b> | <b>S-O<sub>lg</sub> Distance</b> | <b>S-O<sub>nuc</sub> BO</b> | <b>S-O<sub>lg</sub> BO</b> |
|------------------------------|-----------------------------------|----------------------------------|-----------------------------|----------------------------|
| RS                           | 4.09                              | 1.59                             | 0.0006                      | 0.6782                     |
| TS                           | 2.26                              | 1.71                             | 0.2249                      | 0.5191                     |
| PS                           | 1.55                              | 3.95                             | 0.7735                      | 0.0015                     |
| <b>4-nitro</b>               | <b>S-O<sub>nuc</sub> Distance</b> | <b>S-O<sub>lg</sub> Distance</b> | <b>S-O<sub>nuc</sub> BO</b> | <b>S-O<sub>lg</sub> BO</b> |
| RS                           | 4.03                              | 1.59                             | 0.0005                      | 0.676                      |
| TS                           | 2.26                              | 1.71                             | 0.2234                      | 0.5166                     |
| PS                           | 1.56                              | 3.96                             | 0.7451                      | 0.0012                     |
| <b>2,6-difluoro</b>          | <b>S-O<sub>nuc</sub> Distance</b> | <b>S-O<sub>lg</sub> Distance</b> | <b>S-O<sub>nuc</sub> BO</b> | <b>S-O<sub>lg</sub> BO</b> |
| RS                           | 3.84                              | 1.59                             | 0.0091                      | 0.6506                     |
| TS                           | 2.28                              | 1.69                             | 0.2208                      | 0.5397                     |
| PS                           | 1.54                              | 3.73                             | 0.791                       | 0.0017                     |
| <b>2-fluoro-4-nitro</b>      | <b>S-O<sub>nuc</sub> Distance</b> | <b>S-O<sub>lg</sub> Distance</b> | <b>S-O<sub>nuc</sub> BO</b> | <b>S-O<sub>lg</sub> BO</b> |
| RS                           | 3.77                              | 1.59                             | 0.0015                      | 0.6547                     |
| TS                           | 2.31                              | 1.69                             | 0.2116                      | 0.5347                     |
| PS                           | 1.54                              | 3.59                             | 0.7975                      | 0.0016                     |
| <b>2,3,4,5,6-pentafluoro</b> | <b>S-O<sub>nuc</sub> Distance</b> | <b>S-O<sub>lg</sub> Distance</b> | <b>S-O<sub>nuc</sub> BO</b> | <b>S-O<sub>lg</sub> BO</b> |
| RS                           | 3.71                              | 1.61                             | 0.0119                      | 0.6278                     |
| TS                           | 2.34                              | 1.70                             | 0.1947                      | 0.5122                     |
| PS                           | 1.52                              | 4.63                             | 0.8365                      | 0.0002                     |
| <b>3-fluoro-4-nitro</b>      | <b>S-O<sub>nuc</sub> Distance</b> | <b>S-O<sub>lg</sub> Distance</b> | <b>S-O<sub>nuc</sub> BO</b> | <b>S-O<sub>lg</sub> BO</b> |
| RS                           | 3.66                              | 1.60                             | 0.0018                      | 0.655                      |
| TS                           | 2.29                              | 1.71                             | 0.2175                      | 0.5171                     |
| PS                           | 1.56                              | 4.54                             | 0.7564                      | 0.0005                     |

<sup>a</sup> RS, TS and PS denote the reactant, transition and product states, respectively. Bond distances are shown in Å. Bond orders (BO) were calculated based on the Wiberg bond index<sup>7</sup> using natural bond orbital (NBO) analysis.<sup>8</sup>

**Table S101.** Geometries at key stationary points for the alkaline hydrolysis of substituted sulfate diesters in the presence of 8 additional explicit water molecules, obtained using the M11L<sup>1</sup> functional.<sup>a</sup>

| <b>4-chloro-3-nitro</b>      | <b>S-O<sub>nuc</sub> Distance</b> | <b>S-O<sub>lg</sub> Distance</b> | <b>S-O<sub>nuc</sub> BO</b> | <b>S-O<sub>lg</sub> BO</b> |
|------------------------------|-----------------------------------|----------------------------------|-----------------------------|----------------------------|
| RS                           | 4.27                              | 1.59                             | 0.0008                      | 0.6709                     |
| TS                           | 2.22                              | 1.72                             | 0.2459                      | 0.5249                     |
| PS                           | 1.46                              | 4.8                              | 0.9992                      | 0.0002                     |
| <b>4-nitro</b>               | <b>S-O<sub>nuc</sub> Distance</b> | <b>S-O<sub>lg</sub> Distance</b> | <b>S-O<sub>nuc</sub> BO</b> | <b>S-O<sub>lg</sub> BO</b> |
| RS                           | 5.81                              | 1.58                             | 0.0001                      | 0.6991                     |
| TS                           | 2.22                              | 1.72                             | 0.2432                      | 0.5151                     |
| PS                           | 1.46                              | 4.6                              | 0.9886                      | 0.0004                     |
| <b>2,6-difluoro</b>          | <b>S-O<sub>nuc</sub> Distance</b> | <b>S-O<sub>lg</sub> Distance</b> | <b>S-O<sub>nuc</sub> BO</b> | <b>S-O<sub>lg</sub> BO</b> |
| RS                           | 4.89                              | 1.59                             | 0.0005                      | 0.6649                     |
| TS                           | 2.23                              | 1.71                             | 0.2311                      | 0.5246                     |
| PS                           | 1.56                              | 3.62                             | 0.7711                      | 0.0032                     |
| <b>2-fluoro-4-nitro</b>      | <b>S-O<sub>nuc</sub> Distance</b> | <b>S-O<sub>lg</sub> Distance</b> | <b>S-O<sub>nuc</sub> BO</b> | <b>S-O<sub>lg</sub> BO</b> |
| RS                           | 3.39                              | 1.6                              | 0.003                       | 0.6371                     |
| TS                           | 2.26                              | 1.71                             | 0.2314                      | 0.5172                     |
| PS                           | 1.55                              | 3.64                             | 0.7785                      | 0.001                      |
| <b>2,3,4,5,6-pentafluoro</b> | <b>S-O<sub>nuc</sub> Distance</b> | <b>S-O<sub>lg</sub> Distance</b> | <b>S-O<sub>nuc</sub> BO</b> | <b>S-O<sub>lg</sub> BO</b> |
| RS                           | 3.77                              | 1.62                             | 0.0008                      | 0.6486                     |
| TS                           | 2.25                              | 1.72                             | 0.2213                      | 0.513                      |
| PS                           | 1.56                              | 3.93                             | 0.768                       | 0.0021                     |
| <b>3-fluoro-4-nitro</b>      | <b>S-O<sub>nuc</sub> Distance</b> | <b>S-O<sub>lg</sub> Distance</b> | <b>S-O<sub>nuc</sub> BO</b> | <b>S-O<sub>lg</sub> BO</b> |
| RS                           | 4.97                              | 1.6                              | 0.0003                      | 0.6687                     |
| TS                           | 2.23                              | 1.71                             | 0.2377                      | 0.54                       |
| PS                           | 1.47                              | 4.29                             | 1.0008                      | 0.0009                     |

<sup>a</sup> RS, TS and PS denote the reactant, transition and product states, respectively. Bond distances are shown in Å. Bond orders (BO) were calculated based on the Wiberg bond index<sup>7</sup> using natural bond orbital (NBO) analysis.<sup>8</sup>

**Table S102.** Geometries at key stationary points for the alkaline hydrolysis of substituted sulfate diesters in the presence of 0 additional explicit water molecules (pure implicit solvation), obtained using the M062X<sup>4</sup> functional.<sup>a</sup>

| <b>4-chloro-3-nitro</b>      | <b>S-O<sub>nuc</sub> Distance</b> | <b>S-O<sub>lg</sub> Distance</b> | <b>S-O<sub>nuc</sub> BO</b> | <b>S-O<sub>lg</sub> BO</b> |
|------------------------------|-----------------------------------|----------------------------------|-----------------------------|----------------------------|
| RS                           | 3.61                              | 1.61                             | 0.0097                      | 0.6705                     |
| TS                           | 2.39                              | 1.69                             | 0.2314                      | 0.5774                     |
| PS                           | 1.59                              | 3.58                             | 0.752                       | 0.0022                     |
| <b>4-nitro</b>               | <b>S-O<sub>nuc</sub> Distance</b> | <b>S-O<sub>lg</sub> Distance</b> | <b>S-O<sub>nuc</sub> BO</b> | <b>S-O<sub>lg</sub> BO</b> |
| RS                           | 3.53                              | 1.61                             | 0.0112                      | 0.6722                     |
| TS                           | 2.39                              | 1.69                             | 0.2306                      | 0.5775                     |
| PS                           | 1.59                              | 3.63                             | 0.7535                      | 0.0014                     |
| <b>2,6-difluoro</b>          | <b>S-O<sub>nuc</sub> Distance</b> | <b>S-O<sub>lg</sub> Distance</b> | <b>S-O<sub>nuc</sub> BO</b> | <b>S-O<sub>lg</sub> BO</b> |
| RS                           | 4.31                              | 1.62                             | 0.0042                      | 0.6624                     |
| TS                           | 2.44                              | 1.69                             | 0.196                       | 0.5769                     |
| PS                           | 1.59                              | 3.28                             | 0.7421                      | 0.0047                     |
| <b>2-fluoro-4-nitro</b>      | <b>S-O<sub>nuc</sub> Distance</b> | <b>S-O<sub>lg</sub> Distance</b> | <b>S-O<sub>nuc</sub> BO</b> | <b>S-O<sub>lg</sub> BO</b> |
| RS                           | 3.54                              | 1.62                             | 0.0113                      | 0.6576                     |
| TS                           | 2.41                              | 1.69                             | 0.2203                      | 0.5659                     |
| PS                           | 1.59                              | 3.56                             | 0.7545                      | 0.0016                     |
| <b>2,3,4,5,6-pentafluoro</b> | <b>S-O<sub>nuc</sub> Distance</b> | <b>S-O<sub>lg</sub> Distance</b> | <b>S-O<sub>nuc</sub> BO</b> | <b>S-O<sub>lg</sub> BO</b> |
| RS                           | 3.70                              | 1.64                             | 0.0073                      | 0.6398                     |
| TS                           | 2.47                              | 1.70                             | 0.1949                      | 0.5604                     |
| PS                           | 1.59                              | 3.49                             | 0.7503                      | 0.0023                     |
| <b>3-fluoro-4-nitro</b>      | <b>S-O<sub>nuc</sub> Distance</b> | <b>S-O<sub>lg</sub> Distance</b> | <b>S-O<sub>nuc</sub> BO</b> | <b>S-O<sub>lg</sub> BO</b> |
| RS                           | 3.57                              | 1.61                             | 0.0105                      | 0.6633                     |
| TS                           | 2.40                              | 1.69                             | 0.2266                      | 0.5701                     |
| PS                           | 1.59                              | 3.59                             | 0.7545                      | 0.0016                     |

<sup>a</sup> RS, TS and PS denote the reactant, transition and product states, respectively. Bond distances are shown in Å. Bond orders (BO) were calculated based on the Wiberg bond index<sup>7</sup> using natural bond orbital (NBO) analysis.<sup>8</sup>

**Table S103.** Geometries at key stationary points for the alkaline hydrolysis of substituted sulfate diesters in the presence of 2 additional explicit water molecules, obtained using the M062X<sup>4</sup> functional.<sup>a</sup>

| <b>4-chloro-3-nitro</b>      | <b>S-O<sub>nuc</sub> Distance</b> | <b>S-O<sub>lg</sub> Distance</b> | <b>S-O<sub>nuc</sub> BO</b> | <b>S-O<sub>lg</sub> BO</b> |
|------------------------------|-----------------------------------|----------------------------------|-----------------------------|----------------------------|
| RS                           | 3.8                               | 1.61                             | 0.0066                      | 0.6703                     |
| TS                           | 2.43                              | 1.67                             | 0.2193                      | 0.587                      |
| PS                           | 4.9                               | 1.55                             | 0.8516                      | 0.0003                     |
| <b>4-nitro</b>               | <b>S-O<sub>nuc</sub> Distance</b> | <b>S-O<sub>lg</sub> Distance</b> | <b>S-O<sub>nuc</sub> BO</b> | <b>S-O<sub>lg</sub> BO</b> |
| RS                           | 3.52                              | 1.61                             | 0.0085                      | 0.6682                     |
| TS                           | 2.35                              | 1.70                             | 0.2173                      | 0.5692                     |
| PS                           | 1.59                              | 3.60                             | 0.7435                      | 0.0018                     |
| <b>2,6-difluoro</b>          | <b>S-O<sub>nuc</sub> Distance</b> | <b>S-O<sub>lg</sub> Distance</b> | <b>S-O<sub>nuc</sub> BO</b> | <b>S-O<sub>lg</sub> BO</b> |
| RS                           | 3.29                              | 1.62                             | 0.018                       | 0.6546                     |
| TS                           | 2.40                              | 1.69                             | 0.2047                      | 0.577                      |
| PS                           | 1.59                              | 3.20                             | 0.7509                      | 0.0052                     |
| <b>2-fluoro-4-nitro</b>      | <b>S-O<sub>nuc</sub> Distance</b> | <b>S-O<sub>lg</sub> Distance</b> | <b>S-O<sub>nuc</sub> BO</b> | <b>S-O<sub>lg</sub> BO</b> |
| RS                           | 3.36                              | 1.62                             | 0.0133                      | 0.655                      |
| TS                           | 2.38                              | 1.70                             | 0.2041                      | 0.5583                     |
| PS                           | 1.58                              | 3.51                             | 0.7607                      | 0.0019                     |
| <b>2,3,4,5,6-pentafluoro</b> | <b>S-O<sub>nuc</sub> Distance</b> | <b>S-O<sub>lg</sub> Distance</b> | <b>S-O<sub>nuc</sub> BO</b> | <b>S-O<sub>lg</sub> BO</b> |
| RS                           | 3.35                              | 1.63                             | 0.0183                      | 0.638                      |
| TS                           | 2.45                              | 1.69                             | 0.1841                      | 0.5703                     |
| PS                           | 1.59                              | 3.36                             | 0.7575                      | 0.0032                     |
| <b>3-fluoro-4-nitro</b>      | <b>S-O<sub>nuc</sub> Distance</b> | <b>S-O<sub>lg</sub> Distance</b> | <b>S-O<sub>nuc</sub> BO</b> | <b>S-O<sub>lg</sub> BO</b> |
| RS                           | 3.47                              | 1.62                             | 0.0097                      | 0.6651                     |
| TS                           | 2.36                              | 1.70                             | 0.2125                      | 0.5659                     |
| PS                           | 1.58                              | 3.58                             | 0.7603                      | 0.0017                     |

<sup>a</sup> RS, TS and PS denote the reactant, transition and product states, respectively. Bond distances are shown in Å. Bond orders (BO) were calculated based on the Wiberg bond index<sup>7</sup> using natural bond orbital (NBO) analysis.<sup>8</sup>

**Table S104.** Geometries at key stationary points for the alkaline hydrolysis of substituted sulfate diesters in the presence of 4 additional explicit water molecules, obtained using the M062X<sup>4</sup> functional.<sup>a</sup>

| <b>4-chloro-3-nitro</b>      | <b>S-O<sub>nuc</sub> Distance</b> | <b>S-O<sub>lg</sub> Distance</b> | <b>S-O<sub>nuc</sub> BO</b> | <b>S-O<sub>lg</sub> BO</b> |
|------------------------------|-----------------------------------|----------------------------------|-----------------------------|----------------------------|
| RS                           | 4.27                              | 1.61                             | 0.0009                      | 0.6795                     |
| TS                           | 2.33                              | 1.71                             | 0.1936                      | 0.553                      |
| PS                           | 1.50                              | 4.64                             | 0.9739                      | 0.0002                     |
| <b>4-nitro</b>               | <b>S-O<sub>nuc</sub> Distance</b> | <b>S-O<sub>lg</sub> Distance</b> | <b>S-O<sub>nuc</sub> BO</b> | <b>S-O<sub>lg</sub> BO</b> |
| RS                           | 4.09                              | 1.61                             | 0.0005                      | 0.696                      |
| TS                           | 2.31                              | 1.71                             | 0.2027                      | 0.5577                     |
| PS                           | 1.59                              | 3.77                             | 0.7513                      | 0.0013                     |
| <b>2,6-difluoro</b>          | <b>S-O<sub>nuc</sub> Distance</b> | <b>S-O<sub>lg</sub> Distance</b> | <b>S-O<sub>nuc</sub> BO</b> | <b>S-O<sub>lg</sub> BO</b> |
| RS                           | 3.19                              | 1.63                             | 0.0181                      | 0.6397                     |
| TS                           | 2.36                              | 1.70                             | 0.1882                      | 0.5676                     |
| PS                           | 1.60                              | 3.17                             | 0.7007                      | 0.0065                     |
| <b>2-fluoro-4-nitro</b>      | <b>S-O<sub>nuc</sub> Distance</b> | <b>S-O<sub>lg</sub> Distance</b> | <b>S-O<sub>nuc</sub> BO</b> | <b>S-O<sub>lg</sub> BO</b> |
| RS                           | 3.19                              | 1.63                             | 0.0188                      | 0.6392                     |
| TS                           | 2.37                              | 1.69                             | 0.1855                      | 0.5679                     |
| PS                           | 1.48                              | 4.72                             | 1.0595                      | 0.0002                     |
| <b>2,3,4,5,6-pentafluoro</b> | <b>S-O<sub>nuc</sub> Distance</b> | <b>S-O<sub>lg</sub> Distance</b> | <b>S-O<sub>nuc</sub> BO</b> | <b>S-O<sub>lg</sub> BO</b> |
| RS                           | 2.98                              | 1.66                             | 0.0297                      | 0.5907                     |
| TS                           | 2.42                              | 1.71                             | 0.1609                      | 0.5367                     |
| PS                           | 1.58                              | 3.47                             | 0.7484                      | 0.0026                     |
| <b>3-fluoro-4-nitro</b>      | <b>S-O<sub>nuc</sub> Distance</b> | <b>S-O<sub>lg</sub> Distance</b> | <b>S-O<sub>nuc</sub> BO</b> | <b>S-O<sub>lg</sub> BO</b> |
| RS                           | 3.22                              | 1.62                             | 0.0049                      | 0.6592                     |
| TS                           | 2.33                              | 1.70                             | 0.1979                      | 0.5643                     |
| PS                           | 1.59                              | 3.47                             | 0.7329                      | 0.0021                     |

<sup>a</sup> RS, TS and PS denote the reactant, transition and product states, respectively. Bond distances are shown in Å. Bond orders (BO) were calculated based on the Wiberg bond index<sup>7</sup> using natural bond orbital (NBO) analysis.<sup>8</sup>



**Table S105.** Geometries at key stationary points for the alkaline hydrolysis of substituted sulfate diesters in the presence of 8 additional explicit water molecules, obtained using the M062X<sup>4</sup> functional.<sup>a</sup>

| <b>4-chloro-3-nitro</b>      | <b>S-O<sub>nuc</sub> Distance</b> | <b>S-O<sub>lg</sub> Distance</b> | <b>S-O<sub>nuc</sub> BO</b> | <b>S-O<sub>lg</sub> BO</b> |
|------------------------------|-----------------------------------|----------------------------------|-----------------------------|----------------------------|
| RS                           | 3.2                               | 1.62                             | 0.0037                      | 0.6745                     |
| TS                           | 2.29                              | 1.69                             | 0.2281                      | 0.5897                     |
| PS                           | 1.48                              | 4.59                             | 1.1217                      | 0.0003                     |
| <b>4-nitro</b>               | <b>S-O<sub>nuc</sub> Distance</b> | <b>S-O<sub>lg</sub> Distance</b> | <b>S-O<sub>nuc</sub> BO</b> | <b>S-O<sub>lg</sub> BO</b> |
| RS                           | 3.16                              | 1.62                             | 0.004                       | 0.6855                     |
| TS                           | 2.26                              | 1.7                              | 0.2308                      | 0.5915                     |
| PS                           | 1.48                              | 3.99                             | 1.1272                      | 0.0013                     |
| <b>2,6-difluoro</b>          | <b>S-O<sub>nuc</sub> Distance</b> | <b>S-O<sub>lg</sub> Distance</b> | <b>S-O<sub>nuc</sub> BO</b> | <b>S-O<sub>lg</sub> BO</b> |
| RS                           | 3.32                              | 1.62                             | 0.0027                      | 0.6531                     |
| TS                           | 2.32                              | 1.70                             | 0.1921                      | 0.5599                     |
| PS                           | 1.59                              | 3.20                             | 0.7749                      | 0.0058                     |
| <b>2-fluoro-4-nitro</b>      | <b>S-O<sub>nuc</sub> Distance</b> | <b>S-O<sub>lg</sub> Distance</b> | <b>S-O<sub>nuc</sub> BO</b> | <b>S-O<sub>lg</sub> BO</b> |
| RS                           | 3.13                              | 1.62                             | 0.0062                      | 0.6462                     |
| TS                           | 2.35                              | 1.7                              | 0.1936                      | 0.5551                     |
| PS                           | 1.49                              | 4.07                             | 1.0766                      | 0.0006                     |
| <b>2,3,4,5,6-pentafluoro</b> | <b>S-O<sub>nuc</sub> Distance</b> | <b>S-O<sub>lg</sub> Distance</b> | <b>S-O<sub>nuc</sub> BO</b> | <b>S-O<sub>lg</sub> BO</b> |
| RS                           | 3.08                              | 1.64                             | 0.0074                      | 0.6401                     |
| TS                           | 2.34                              | 1.71                             | 0.1888                      | 0.5625                     |
| PS                           | 1.48                              | 3.86                             | 1.1097                      | 0.0008                     |
| <b>3-fluoro-4-nitro</b>      | <b>S-O<sub>nuc</sub> Distance</b> | <b>S-O<sub>lg</sub> Distance</b> | <b>S-O<sub>nuc</sub> BO</b> | <b>S-O<sub>lg</sub> BO</b> |
| RS                           | 3.28                              | 1.62                             | 0.0026                      | 0.6761                     |
| TS                           | 2.26                              | 1.7                              | 0.2228                      | 0.5915                     |
| PS                           | 1.49                              | 4.88                             | 1.0429                      | 0.0004                     |

<sup>a</sup> RS, TS and PS denote the reactant, transition and product states, respectively. Bond distances are shown in Å. Bond orders (BO) were calculated based on the Wiberg bond index<sup>7</sup> using natural bond orbital (NBO) analysis.<sup>8</sup>

## Cartesian Coordinates of Optimized Stationary Points

Due to the large number of stationary points involved, Cartesian coordinates of all stationary points have been presented as a separate zip file.

## Supplementary References

1. Peverati, R.; Truhlar, D. G., M11-L: A Local Density Functional That Provides Improved Accuracy for Electronic Structure Calculations in Chemistry and Physics. *J. Phys. Chem. Lett.* **2012**, *3*, 117-124.
2. Younker, J. M.; Hengge, A. C., A Mechanistic Study of the Alkaline Hydrolysis of Diaryl Sulfate Diesters. *J. Org. Chem.* **2004**, *69*, 9043-9048.
3. Chai, J.-D.; Head-Gordon, M., Long-Range Corrected Hybrid Density Functionals with Damped Atom–Atom Dispersion Corrections. *Phys. Chem. Chem. Phys.* **2008**, *10*, 6615-6620.
4. Zhao, Y.; Truhlar, D. G., The M06 Suite of Density Functionals for Main Group Thermochemistry, Thermochemical Kinetics, Noncovalent Interactions, Excited States, and Transition Elements: Two New Functionals and Systematic Testing of Four M06-Class Functionals and 12 Other Functionals. *Theor. Chem. Acc.* **2008**, *120*, 215-241.
5. Breneman, C. M.; Wiberg, K. B., Determining Atom-Centered Monopoles from Molecular Electrostatic Potentials. The Need for High Sampling Density in Formamide Conformational Analysis. *J. Comp. Chem.* **1990**, *11*, 361-373.
6. Hine, J., Rate and Equilibrium in the Addition of Bases to Electrophilic Carbon and in S<sub>N</sub>1 Reactions. *J. Am. Chem. Soc.* **1971**, *93*, 3701-3708.
7. Wiberg, K. B., Application of the Pople-Santry-Segal CNDO Method to the Cyclopropylcarbinyl and Cyclobutyl Cation and to Bicyclobutane. *Tetrahedron* **1968**, *24*, 1083-1096.
8. Foster, J. P.; Weinhold, F., Natural Hybrid Orbitals. *J. Am. Chem. Soc.* **1980**, *102*, 7211-7218.
